# Supplementary material
Source: PubMed Central journal article supplement (PMC6525522)
Supplement: pnas.1820863116.sapp.pdf [file pnas.1820863116.sapp.pdf]

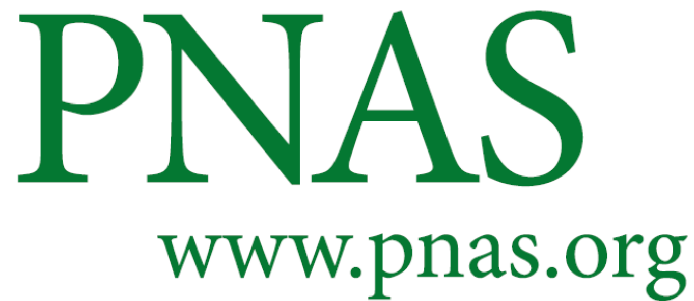

## Supplementary Information for

Assembly of modern mammal community structure driven by Late Cretaceous dental evolution, rise of flowering plants, and dinosaur demise

Meng Chen, Caroline A.E. Strömberg, and Gregory P. Wilson

Meng Chen and Gregory P. Wilson

Emails: [mengchen@nju.edu.cn](mailto:mengchen@nju.edu.cn); [gpwilson@uw.edu](mailto:gpwilson@uw.edu)

### **This PDF file includes:**

Supplementary text  
Figs. S1 to S15  
Tables S1 to S20  
References for SI reference citations

### **Other supplementary materials for this manuscript include the following:**

Dataset S1

## Supplementary Information Text

This study is the first to analyze the ecological structure of Mesozoic mammaliaform communities with the aim of identifying evolutionary and ecological drivers that have shaped mammaliaform communities through time. We used three ecological parameters of mammaliaform species to calculate two taxon-free ecological indices for each community, and we analyze the ecospace occupation of each extinct mammaliaform community in comparison to extant counterparts from diverse biomes. Our results indicate that Mesozoic mammaliaform communities and extant, small-bodied mammalian communities differ significantly, and these differences might stem from the intrinsic and extrinsic factors, such as developmental constraints, ecological selective pressures, and environmental changes. Here, we provide full description of the materials and methods and the results of our study.

### Materials and Methods

**Environmental and taxonomic data for extant, small-bodied mammalian communities.** To develop modern analogs against which we interpret the ecology of extinct mammaliaform communities, we surveyed the literature to find the available studies on extant, small-bodied mammalian communities (mid-range body mass mostly  $\leq 5$  kg, following 1, 2). We then assembled a dataset based on whether the publication provided the details of the species composition of the community and had environmental factors (habitat type, climate type, vegetation type) listed and compiled their taxonomic and ecological data for our analyses. The 98 extant, small-bodied mammalian communities in our dataset cover most continents and all major environmental types (see Fig. 1, *SI Appendix*, Dataset S1). Because no Mesozoic flying mammaliaform has been recovered so far, we excluded only the volant taxa (bats) from the extant communities in order to keep the extant small-bodied mammalian communities maximally analogous to their Mesozoic counterparts (3, 4). In total, 410 extant, small-bodied mammalian species (57 families, 25 orders) were included in the dataset (*SI Appendix*, Dataset S1). Each community was categorized using three environmental classification schemes: (i) habitat openness (i.e., open or closed); (ii) climate type (i.e., tropical, arid, temperate, or cold [5]); and (iii) vegetation type (i.e., tropical rainforest, tropical seasonal forest, savanna, grassland, shrubland, desert, temperate forest, or boreal forest [6]; World Wild Fund (WWF) Ecoregions [<https://www.worldwildlife.org/biomes>]; International Geosphere-Biosphere Programme [IGBP, <http://www.igbp.net>]). The climate type of each local community was assigned primarily on the basis of criteria in the Köppen-Geiger climate classification and was verified using a high-resolution (5 arc minute) Köppen-Geiger map (7, 8; <http://koeppen-geiger.vu-wien.ac.at/present.htm>) in Google Earth Pro (version 7.3.2.5491, 64-bit). We recognize that vegetation classifications vary depending on different environmental criteria used, and there is no universal approach for classifying vegetation types of local communities. Thus, we integrated multiple classification schemes, including IGBP land classification, Whittaker Biomes (6), and WWF Terrestrial Ecoregions (<https://www.worldwildlife.org/biome-categories/terrestrial-ecoregions>), to ensure accurate and consistent vegetation assignment for each local community (*SI Appendix*, Dataset S1). Habitat openness was also inferred on the basis of these vegetation classes, with savanna, grassland, shrubland, and desert considered open and the rest closed. For each community, we also compiled available geographic and environmental data for the locality (i.e., latitude, longitude, elevation, mean annual precipitation [MAP], and mean annual temperature [MAT]) from the primary literature (*SI Appendix*, Dataset S1).

**Taxonomic and autecology data for five extinct, small-bodied mammaliaform communities.** Most Mesozoic mammaliaform fossil localities yield isolated elements, predominantly teeth and fragmentary jaws; delicate skulls and associated postcranial skeletons are very rarely preserved. Thus, the opportunity to comprehensively infer the paleoecology of the represented paleocommunities is limited. The Konservat Lagerstätten from the Mid-Upper Jurassic and Lower Cretaceous of northeastern China represent possible exceptions (9). Many of the fossil taxa known from these Lagerstätten are represented by nearly complete skulls and skeletons (9–12), such that robust paleoecological inferences are possible for most members of the paleocommunities (*sensu* 13). Using recent stratigraphic and biostratigraphic correlations of the assemblages (14, 15, but see 16), we compiled four Mesozoic mammaliaform paleocommunities (*SI Appendix*, Table S1): two from the Mid-Late Jurassic, approximately 164–160 million years ago (Ma), namely the Jiulongshan (JLS) paleocommunity from the Jiulongshan Formation and the Tiaojiashan (TJS) paleocommunity from the

Tiaojishan Formation, and two from the Early Cretaceous, approximately 125–122 Ma, namely the Lujiatun-Jianshangou (LJT-JSG) and Dawangzhangzi (DWZZ), both from the Yixian Formation. More precise age data are available for each of these assemblages in the *SI Appendix*, Table S1. The Jiulongshan fossil assemblage was recovered from one locality, whereas the other three assemblages are each a composite of two to three localities correlated to the same stratigraphic horizon and within 80 km of each other. *Acristatherium yanensis*, *Gobiconodon zofiae*, *Juchilestes liaoningensis*, and *Meemanodon lujiatunensis* are all represented by specimens with relatively complete, well-preserved skulls but no postcranial elements. For each, we inferred locomotor mode on the basis of inferences of the phylogenetically closest relative with a well-preserved postcranial skeleton. We excluded three eutriconodontans, *Liaotherium gracile* and *Manchurodon simplicidens* from the Mid-Late Jurassic paleocommunities and *Gobiconodon luoiianus* from the Early Cretaceous paleocommunities, due to poor stratigraphic correlation or poor fossil preservation (17–19); our qualitative assessment is that the inclusion of these taxa would not strongly affect the ecospace occupation. As a Cenozoic point of comparison, we included small-bodied species ( $\leq 5$  kg) from the middle Eocene mammalian assemblage from the Messel Oil Shale Lagerstätte in Germany, which is approximately 47 Ma in age (*SI Appendix*, Table S1).

**Ecological parameters.** We categorized each species in each community according to three ecological parameters: body size, dietary preference, and locomotor mode (*SI Appendix*, Table S2). These ecological parameters reflect important aspects of a species autecology, including physiology, food resource use, habitat use, and survival strategies (20). For most extant, small-bodied mammals, these traits are documented in natural history compendia and the primary literature (21–23), and, for extinct taxa, they can be inferred from well-preserved fossils (24–27). It should be noted that the ecological parameters in the literature are often provided either as descriptive information or explicit details based on the field experiments. In cases in which ecological assessments of different authors were contradictory, we made an assessment based on the evidenced presented. We used body mass as a proxy for body size, with the mid-range value when it was reported as a range in the literature (*SI Appendix*, Dataset S1). For extinct species, we used published estimates of body mass, or estimated it ourselves by applying taxon- and morphology-appropriate regression formulae (28, 29) to relevant skeletal measurements from the literature or from personal observations of available specimens (*SI Appendix*, Table S1). We acknowledge that it would be best to use the same skeletal measurement and same formula to estimate the body mass for all of the fossil species. However, the incomplete nature of the fossil record prevents us from doing so. A secondary analysis to estimate body mass indicates that our body-size ranking scheme of the Mesozoic species is robust to the variation introduced by the skeletal measurement and formula used (*SI Appendix*, Table S3). We transformed all body masses to a  $\log_2$ -scale (as opposed to a  $\log_{10}$ -scale) so as to not overly compress the subtle differences in body mass among small-bodied mammaliaforms. Based on the transformed body mass, we ranked the body size from one to five (*SI Appendix*, Table S2).

For dietary preference, we categorized extant, small-bodied species into one of six dietary categories (carnivory, insectivory, omnivory, granivory, frugivory, or herbivory; *SI Appendix*, Table S2). Carnivory refers to species preying on animals as their primary food source; insectivory is restricted to species primarily feeding on insects; omnivory refers to species eating both animal and plant products. Herbivory is used broadly to include extant, small-bodied mammalian species that consume diverse plant materials (seeds, fruits, leaves, roots, etc.); whereas frugivory and granivory are restricted to those species that have diets predominantly of fruits or seeds, respectively. We note that the dietary preference of many extant, small-bodied mammalian species can vary according to fluctuating ecological and environmental conditions (e.g., competition, seasonality, and geography [30]), but for practical reasons we did not incorporate that level of detail into the dataset in this study.

We created an ordinal scale of the six dietary preferences following the ordinal scale from the orientation patch count (OPC) of extant mammalian species. OPC, which is a measure of dental complexity, strongly correlates with dietary preferences among extant mammals (e.g., carnivorans, rodents, chiropterans, and marsupials; [26, 31, 32]); namely, values increase from carnivory to omnivory to herbivory (26). It has been used as a predictor of primary dietary preference of extinct mammals (e.g., plesiadapids and multituberculates [33, 34]). We re-visited published OPC datasets (26, 31) and refined the dietary preferences of the sampled extant taxa according to our six categories. Then, we re-calculated the OPC range for each category. These new

ranges provided an ordinal ranking scheme for our dietary categories; carnivory has the lowest mean OPC values, followed by insectivory, omnivory, granivory, frugivory, and herbivory (*SI Appendix*, Table S2).

Ideally, OPC (or some other quantitative proxy) should be used to infer the dietary preference of each fossil species. However, because most of the fossil specimens in this study are preserved as flattened (two-dimensional) slabs, they are less amenable to OPC and other quantitative methods that require undistorted three-dimensional preservation of the tooth crowns. Thus, to infer the dietary preference of each fossil species in our study we relied on our own assessment of gross dental morphology, wear facets, and gut contents as well as assessments by previous studies (*SI Appendix*, Table S4). Because of the importance of the possible co-evolution of mammals and angiosperms, we designated an herbivorous and omnivorous diets that included fruit by using “\*” in *SI Appendix*, Table S1. Future studies will aim to directly measure OPC and other dental shape metrics in these and other extinct taxa (35).

Chen and Wilson (27) conducted quantitative analyses of osteological indices derived from linear measurements of appendicular skeletons of 107 extant, small-bodied mammalian species. The results of those analyses were used to infer locomotor mode in a sample of Mesozoic mammaliaform taxa. They identified a major morphofunctional continuum that extends from terrestrial to scansorial, arboreal, and gliding modes, reflecting an increasingly slender postcranial skeleton with longer limb output levers adapted for speed and agility. The continuum also extends from terrestrial to semiaquatic/semifossorial, and fossorial modes, reflecting an increasingly robust postcranial skeleton with shorter limb output levers adapted for powerful, propulsive strokes (27). Following that study (27), we categorized the locomotor mode of each extant and extinct species as gliding, arboreal, scansorial, terrestrial, semiaquatic, semifossorial, fossorial, or saltatorial (*SI Appendix*, Table S2). The locomotor mode information of extant, small-bodied mammalian species was taken from the primary literature (*SI Appendix*, Dataset S1). We ranked locomotor modes from one to eight according to the locomotor continuum established in (27:fig. 4A), where all modes but the saltatorial mode were assigned in a more-or-less linear fashion along Canonical Function 2 from gliding to fossoriality. To verify this continuum, we used the published dataset of (27) to calculate the morphological distances using the centroid of the gliding mode against the centroid of each other seven locomotor modes (*SI Appendix*, Table S2). We designated the gliding mode as rank 1 and the other locomotor modes were assigned successive ranks according to increasing morphological distance from the gliding mode along the locomotor continuum (*SI Appendix*, Table S2). Because the continuum is not absolutely linear, particularly for the saltatorial mode, we explored the alternative ordinations by applying three alternative ranking schemes of the locomotor modes. We placed the saltatorial at locomotor ranks 5, 6, or 7 in each alternative ranking scheme because the function and morphology of the postcranial skeletons of saltatorial species more closely resemble ground-dwelling species (terrestrial, semiaquatic, semifossorial, and fossorial) than they resemble tree-living species (gliding, arboreal, and scansorial). As a result, three alternative schemes to rank locomotor modes from 1 to 8 are (a) gliding, arboreal, scansorial, terrestrial, saltatorial, semiaquatic, semifossorial, fossorial; (b) gliding, arboreal, scansorial, terrestrial, semiaquatic, saltatorial, semifossorial, fossorial; and (c) gliding, arboreal, scansorial, terrestrial, semiaquatic, semifossorial, saltatorial, fossorial. We ultimately chose the scheme in *SI Appendix* Table S2 for our analysis, see Results for details.

For the fossil species, we assigned locomotor mode based on published studies of the functional morphology or morphometrics of the fossil taxa and their closest relatives (*SI Appendix*, Table S1).

**Ecological structure analysis.** Ecological parameters (body size, dietary preference, and locomotor mode) were used to form a three-dimensional theoretical ecospace of 240 ecological-parameter-value combinations (~“niches,” hereafter, eco-cells) (5 body-size ranks  $\times$  6 dietary preference ranks  $\times$  8 locomotor ranks). Using the parameter values for each species, we plotted the ecospace occupation of each extant, small-bodied mammalian community in our study. We then quantified the magnitude of the filled ecospace of each community using two indices: ecological disparity (EDisp) and ecological richness (ERich). Ecological disparity measures the magnitude of ecological differences among species in a given ecospace. It is calculated as the mean pairwise distance of all species pairs in the same community. The calculation for one pair of species ( $i, j$ ) is:

$$EDisp_{(i,j)} = |BS_i - BS_j| + |DT_i - DT_j| + |LM_i - LM_j|$$

where  $BS$  is the body-size rank,  $DT$  is the dietary preference rank, and  $LM$  is the locomotor mode rank for species  $i$  and  $j$ . As an example of a species-pair comparison, the elegant fat-tailed opossum *Thylamys elegans*, which weighs between 18 g and 55 g (mid-range body mass 37 g), primarily eats insects, and uses scansorial



locomotion, was assigned to eco-cell 2-2-3; whereas the Bolivian chinchilla rat *Abrocoma bennetti* was assigned to eco-cell 3-6-3 because it weighs slightly more (mid-range body mass 263 g), primarily eats a range of plant materials, and uses scansorial locomotion. The ecological disparity between *T. elegans* and *A. bennetti* is calculated as  $EDisp_{(M. elegans, A. bennetti)} = |2 - 3| + |2 - 6| + |3 - 3| = 5$ . ERich measures the number of cells occupied by a community in the theoretical ecospace. Both EDisp and ERich are taxon-free indices; the latter resembles the functional richness index, which can be used with continuous or ordinal variables (36, 37). However, ERich differs from functional richness in measuring the number of occupied eco-cells rather than the smallest convex hull volume that encloses all species (37). We expect ERich is highly correlated with species richness: the higher the number of species, the higher the ERich in a community. It should be noted that the results of EDisp analyses may be changed by using alternative ranking schemes of locomotor modes (see Results for details); ERich analyses as well as the rest of other analyses, however, could not be altered regardless of ranking schemes.

We calculated 95% confidence intervals for EDisp values by resampling extant, small-bodied mammalian communities in each of the two habitat types, four different climate types, and eight vegetation types with replacements (1,000 bootstraps). To assess whether species richness influences EDisp, we constrained the number of species in each community in successive resampling runs. More specifically, we constrained successive resampling runs to five, seven, and ten species to mirror the species richness of the four assembled Mesozoic mammaliaform paleocommunities and, in turn, provide more balanced comparisons.

It is commonly assumed that extant mammalian communities are ultimately shaped by climate change at local, regional, and global scales (38–40). To test this assumption, we investigated whether ecological structure of the extant communities is correlated with environmental factors. Specifically, we tested whether EDisp and ERich are correlated with latitude, mean annual temperature (MAT), mean annual precipitation (MAP), and elevation. For each combination of ecological structure metric (EDisp and ERich) and environmental factor, we ran a simple linear regression analysis and calculated 95% confidence intervals.

**Ecospace occupation analysis.** We also compared ecospace occupation of small-bodied mammaliaform communities (i.e., which eco-cells were filled) within and across environmental categories. For extant communities, we calculated ecological beta diversity within each environmental type (habitat, climate or vegetation) using multivariate dispersion (41, 42). We calculated the Euclidean distance of the centroid of each community from the grand centroid of all communities within that environmental category (e.g., tropical climate) (43). Ecological beta diversity of that environmental category was then calculated as the mean Euclidean distance of all communities in that category from the grand centroid—smaller values indicate smaller variations in ecospace occupation among communities in that environmental category. Because we do not have more than two extinct communities from any time horizon or any paleoenvironmental grouping, we could not apply multivariate dispersion to measure beta diversity among extinct mammaliaform communities. Instead, to compare ecospace occupations of extinct communities to extant communities, we calculated Jaccard dissimilarity index for each pairwise combination of an extinct and an extant community.

To compare ecospace plots across environmental types that are represented by variable numbers of communities, we used resampling to construct exemplar plots of ecospace occupation for each environmental type. First, we determined the number of species typical for each environmental type by resampling the number of species of each community in that environmental type (e.g., grassland). Then, we bootstrapped the occupied eco-cells of all communities in that environmental type (e.g., grassland) up to that number of species for that environmental type.

**Discriminant function analysis.** We conducted a series of discriminant function analyses (DFA) using data of extant, small-bodied mammalian communities to assess how well ecological parameters can be used to infer the environmental categories of both extinct and extant mammaliaform communities (44, 45). We standardized the data by calculating the relative proportion of each rank for each ecological parameter for each environmental type (44; *SI Appendix*, Table S5) and then arcsine-transformed these data prior to the DFA (46). The results of the DFA provide a quantitative assessment on how well the extant, small-bodied mammalian communities can be used for categorizing habitat openness, climate type, and vegetation type. We then used this training set as a

basis to predict the paleoenvironment of each of the five extinct mammaliaform communities for which we had also performed the same data transformation.

**Null model test.** To evaluate the significance of patterns of ecospace occupation across different environmental types, we calculated a checkerboard score. This metric was originally developed for evaluating species co-occurrence pattern by measuring the number of “checkerboard units” of all species in an assemblage (47). In our study we instead treat each unique eco-cell (e.g., 2-2-3 and 3-6-3 in the example above) as a “species.” The number of checkerboard units for each possible pair of eco-cells is calculated as

$$C_{i,j} = (r_i - S) \times (r_j - S),$$

where  $r_i$  and  $r_j$  are the row totals of eco-cells  $i$  and  $j$ , respectively, and  $S$  is the total number of co-occurrences of eco-cells  $i$  and  $j$  (47). The  $C$ -score is the mean of checkerboard units across all eco-cell pairs and was evaluated for eco-cell occurrence matrices for all environmental categories. Eco-cells that always occur together will have zero  $C$ -score, whereas the eco-cells that are largely segregated will have a large  $C$ -score. Observed  $C$ -scores were used to compare to the average  $C$ -scores generated from 1000 randomized co-occurrence matrices (47). We used the EcoSimR with the fixed-fixed model (SIM9; 48) that is developed for R language programming to generate the null distribution of the  $C$ -scores. The SIM9 preserves the number of occurrences of the row and column totals in data metrics and is robust against the Type I and II errors (49).

Because our extant, small-bodied mammalian communities differ from each other in the number of species, we cannot directly compare the community  $C$ -score to one another in each environmental type. Thus, we calculated the standard effect size ( $SES$ ) of each environment. The  $SES$  measures the number of standard deviations that the observed index is above or below the mean of simulated communities (50). The  $SES$  is calculated as

$$SES = (I_{obs} - I_{sim}) / S_{sim},$$

where  $I_{obs}$  corresponds to the index of the observed community,  $I_{sim}$  corresponds to the simulated community and  $S_{sim}$  is the standard deviation of the simulated communities.

**Software.** We performed all analyses and constructed all figures using the R statistical environment (51) and Mathematica 11.

## Results

**Ecological structure.** Ecological disparity (EDisp) and ecological richness (ERich) vary according to habitat openness, climate type, and vegetation type. On average, both closed- and open-habitat communities have relatively high ecological disparity (student t-test,  $P = 0.083$ ; *SI Appendix*, Tables S6, S7 and Fig. S1), although the closed-habitat communities fill significantly more eco-cells than open-habitat communities do ( $ERich_{closed} = 8.40$ ,  $ERich_{open} = 4.75$ ; student’s t-test,  $P < 0.001$ ; *SI Appendix*, Tables S6, S8 and Fig. S1). Among the four climate types, tropical mammalian communities have, on average, low ecological disparity ( $EDisp_{tropical} = 3.49$ ) but high ecological richness ( $ERich_{tropical} = 8.63$ ); whereas mammalian communities in arid climates occupy more disparate regions of the ecospace ( $EDisp_{arid} = 3.75$ ) and have lower ecological richness ( $ERich_{arid} = 4.31$ ; *SI Appendix*, Table S6 and Figs. S1, S2). Temperate and cold climate communities have significantly higher ecological disparity than communities in both tropical and arid climates ( $EDisp_{temperate} = 4.12$ ,  $EDisp_{cold} = 4.54$ ; pairwise Student’s t-test,  $P < 0.015$ ) and intermediate ecological richness ( $ERich_{temperate} = 7.10$ ,  $ERich_{cold} = 6.04$ ; *SI Appendix*, Tables S6–S8 and Figs. S1, S2). Among the eight vegetation types, tropical communities differ from each other in that tropical rain forest communities have markedly lower ecological disparity than tropical seasonal forest communities do ( $EDisp_{tropicalrainforest} = 3.20$ ,  $EDisp_{tropicalseasonalforest} = 4.07$ ,  $P < 0.000$ ), though both types of tropical forest communities have high ecological richness ( $ERich_{tropicalrainforest} = 9.33$ ,  $ERich_{tropicalseasonalforest} = 10.13$ ,  $P = 0.764$ ; *SI Appendix*, Tables S6–S8 and Figs. S1, S2). Conversely, communities in more open vegetation types (i.e., savanna, grassland, shrubland, and desert) tend to have low ecological richness ( $ERich_{[range]} = 3.78$ – $5.65$ ), and, with the exception of savanna communities, have relatively high ecological disparity ( $EDisp_{[range]} = 3.54$ – $4.22$ ; *SI Appendix*, Tables S6, S7). Communities in temperate and boreal forests are high in ecological disparity ( $EDisp_{temperateforest} = 4.27$ ,  $EDisp_{borealforest} = 4.26$ ), but have low ecological richness ( $ERich_{temperateforest} = 8.19$ ,  $ERich_{borealforest} = 6.00$ ; *SI Appendix*, Tables S6, S7). The resampled ecological disparity of each environmental category shows no or little difference from the observed average values (*SI*

*Appendix*, Table S9). However, the resampled ecological disparity shows significant difference across most of environmental categories; only three pairwise comparisons show insignificant difference (tropical seasonal forest vs. grassland, tropical seasonal forest vs. shrubland, and desert vs. temperate forest; *SI Appendix*, Table S10). The three alternative ranking schemes for locomotor mode produced similar EDisp patterns across different environmental types (*SI Appendix*, Tables S11).

Among Mesozoic mammaliaform communities, Tiaojishan (TJS) and Dawangzhangzi (DWZZ) mammaliaform communities are both low in ecological disparity ( $\text{EDisp}_{\text{range}} = 2.87\text{--}3.40$ ) and ecological richness ( $\text{ERich}_{\text{range}} = 5.00\text{--}6.00$ ; *SI Appendix*, Table S6). In contrast, Jiulongshan (JLS) mammaliaform community has high ecological disparity ( $\text{EDisp}_{\text{JLS}} = 4.40$ ) but low ecological richness ( $\text{ERich}_{\text{JLS}} = 5.00$ ), whereas Lujiatun-Jianshangou (LJT-JSG) mammaliaform community is low in ecological disparity ( $\text{EDisp}_{\text{LJT-JSG}} = 3.27$ ) but high in ecological richness ( $\text{ERich}_{\text{LJT-JSG}} = 9.00$ ; *SI Appendix*, Table S6). Unlike all of the Mesozoic mammaliaform communities, the Messel Oil Shale Pit mammalian communities are high in both ecological disparity and ecological richness ( $\text{EDisp}_{\text{Messel}} = 5.73$ ,  $\text{ERich}_{\text{Messel}} = 19.0$ ; *SI Appendix*, Table S6).

In addition, our analyses indicate that ecological disparity is not highly correlated with environmental factors except that it is positively correlated with latitude (*SI Appendix*, Fig. S4A). In contrast, ecological richness is highly positively correlated with latitude, mean annual precipitation (MAP), and mean annual temperature (MAT), and negatively correlated with elevation (*SI Appendix*, Fig. S4E, F, G, H). These correlations might reflect that ecological richness, as we expected, is highly correlated with species richness ( $r^2 = 0.955$ ,  $P < 0.001$ ).

**Ecospace occupation.** Together, all extant, small-bodied mammalian communities occupy only 41% of the theoretically possible modes of life in our ecospace (i.e., 99 of the 240 eco-cells; *SI Appendix*, Tables S12). Very small- (< 32 g) to medium body-size categories (128–512 g), ground dwellers predominate in our dataset of extant, small-bodied mammalian species (*SI Appendix*, Table S13 and Fig. S5). The most frequently occupied eco-cell is that for very small (< 32 g), terrestrial insectivores (67 unique occurrences), followed closely by small (32–128 g), terrestrial herbivores (61 unique occurrences) and very small (< 32 g), scansorial omnivores (38 unique occurrences) (*SI Appendix*, Table S13). Large regions of the ecospace are unoccupied, in some cases because those ecological combinations might not be viable (20). For example, we do not record any semiaquatic, semifossorial, fossorial, or saltatorial frugivores, likely because of the limited availability of fleshy fruit in the habitats where these locomotor modes are most advantageous (open environments and aquatic environments, respectively; *SI Appendix*, Table S13; 50). Similarly, the restriction of extant, small-bodied gliding mammals to omnivory might reflect selective pressure to maintain a broad diet, but it might reflect competitive exclusion from more specialized diets by volant mammals (i.e., bats, not included in this study; *SI Appendix*, Table S13). A conspicuous, sparsely filled region of the ecospace is that for medium- to large body-size (128–2048 g) mammals with locomotor modes associated with open habitats (i.e., saltatorial, fossorial, and semifossorial; *SI Appendix*, Table S13 and Fig. S6). It does not seem a case of ecological inviability because those eco-cells are filled by some fossil taxa in our study (see *SI Appendix*, Table S1).

The different environmental types show distinctive patterns of ecospace occupation (Figs. 1, 2 and *SI Appendix*, Table S13 and Figs. S5–S7). Our analysis shows that, within the realized ecospace of extant, small-bodied mammalian communities, ecological structure varies with habitat openness (*SI Appendix*, Tables S12, S13 and Figs. S5A, S6A, S7A). Open-habitat communities fill 56 eco-cells, with the most ones being small-bodied (32–128 g) terrestrial herbivores, very small-bodied (< 32 g) terrestrial insectivores, and small-bodied (32–128 g) terrestrial omnivores (*SI Appendix*, Tables S5, S13 and Fig. S5A). Granivory is also a common dietary preference in open-habitat communities (*SI Appendix*, Tables S5, S13 and Fig. S5A). Closed-habitat communities differ from open-habitat communities in filling more ecospace (86 eco-cells), densely populating the region of ecospace that corresponds to tree-dwelling locomotor modes, and occupying the full range of diet types (*SI Appendix*, Tables S5, S13 and Figs. S5A, S6A); frugivory is not recorded in open-habitat communities (*SI Appendix*, Table S13 and Figs. S5A, S6A).

Ecospace occupation of extant, small-bodied mammalian communities also varies with climate type. A caveat is that some climate categories are a composite of multiple vegetation types with divergent ecological signals; thus, our characterization of ecological structure in these climate types might be influenced by differential sampling of vegetation types. Tropical climate communities, for example, are predominantly drawn

from tropical forests; in turn, the ecological signal from these forests overwhelms the signal from savannas, which have a markedly different ecospace occupation (see below in vegetation type). Nevertheless, like closed-habitat communities, tropical communities (filling 69 eco-cells) are shifted toward the region of the ecospace that corresponds to tree-dwelling locomotor modes (Figs. 2E [left side of ecospace] and *SI Appendix*, Table S13 and Figs. S5B, S6B, S7B). Many species are small- (32–128 g) to medium-sized (128–512 g) omnivores (*SI Appendix*, Tables S5, S13 and Fig. S5B). Arid, temperate, and cold communities more densely populate the regions of the ecospace that correspond to ground-dwelling and subterranean locomotion (Figs. 2E [right side] and *SI Appendix*, Tables S5, S13 and Fig. S6B), and are generally more spread out in the ecospace than tropical communities are (although temperate communities less so). In arid climate, the very small- (< 32 g) to small-bodied (32–128 g) species are more predominant than they are in temperate and cold climates (*SI Appendix*, Tables S5, S13 and Figs. S5B, S6B).

At the level of vegetation types, our results show the clearest pattern of variation in ecological structure. Tropical forest communities, including both tropical rain forest and tropical seasonal forest communities, form a tight and densely packed cluster in the region of the ecospace corresponding to tree-dwelling locomotor modes (*SI Appendix*, Tables S5, S13 and Figs. S5C, S6C, S7C), with tropical seasonal forest communities showing slightly greater variation in locomotor type. Arboreal and scansorial locomotion are the most predominant in those communities (*SI Appendix*, Tables S5, S13 and Fig. S5C). Savanna communities more sparsely populate the ecospace, with focus on its central parts (*SI Appendix*, Fig. S6C) and nearly all species adopt terrestrial locomotor mode (*SI Appendix*, Table S5 and Fig. S5C). All other vegetation types have communities that better span the ecospace and are less densely packed than tropical forest communities.

The beta diversity of ecospace occupation among closed-habitat communities is lower than it is in open-habitat communities (*SI Appendix*, Fig. S8A). This pattern likely relates to the fact that temperate and boreal forest mammalian communities have low beta diversity (*SI Appendix*, Fig. S8C). Likewise, many extant, small-bodied mammalian communities in temperate climates have relatively low beta diversity of ecospace occupation (*SI Appendix*, Fig. S8B).

The results of the null model test indicate that extant, small-bodied mammalian communities of most environmental types show non-random occupation of the ecospace (*SI Appendix*, Table S14 and Fig. S9). The observed *C*-scores of the communities, except in tropical seasonal forest and savanna, are much higher than those of the simulated communities. This result indicates that the pattern of ecospace occupation of those environments is not random. Extant, small-bodied mammalian communities in tropical seasonal forests and savannas cover a great range of ecological variation with limited sample sizes. Savannas, for example, show different tree coverage, rainfall seasonality, soil texture, and fire frequency in Africa, Australia, and South America (52), each of which is represented by two communities in our dataset. Together, this large ecological variation and limited sample size might have led to simulated *C*-scores that are indistinguishable from the observed ones.

**DFA.** The DFA results strongly segregate extant, small-bodied mammalian communities according to different environmental types. Although some ecologies are common in both open- and closed-habitat types (scansorial and terrestrial locomotion, omnivorous and insectivorous diets; *SI Appendix*, Table S5 and Figs. S5A), the DFA indicates that the ecological compositions of these communities are distinct from each other (Figs. 1D and *SI Appendix*, Fig. S10). The discriminant function 1 (DF1) accounts for 100% of variance in the dataset (*SI Appendix*, Table S15). Open- and closed-habitat communities were well segregated along DF1, which is strongly positively correlated with small body size (32–128 g), granivory, and semifossorial and saltatorial locomotion, but negatively correlated with medium to very large body size (> 128 g), omnivory, frugivory, and tree-dwelling locomotor modes (gliding, arboreal, and scansorial; *SI Appendix*, Table S15). It correctly classified 77.55% of all extant, small-bodied mammalian communities (80.00% and 75.47% of closed and open habitats, respectively; *SI Appendix*, Table S16). In total, 22 out of 98 communities were misclassified (*SI Appendix*, Table S16). In closed-habitat communities, the distribution of body sizes is more even, whereas in open-habitat communities smaller-bodied species (< 128 g) predominate (*SI Appendix*, Table S5 and Fig. S5A). Open-habitat communities also have more granivores (they lack frugivores entirely) and more ground-dwelling (saltatorial) and subterranean (semifossorial) mammals; whereas closed-habitat communities have more

mammals that climb and live within trees (gliding, arboreal, and scansorial) and, in addition to frugivores, have more carnivores and omnivores (*SI Appendix*, Table S5 and Fig. S5A).

The DFA discriminates well among climate types (Fig. 1D and *SI Appendix*, Fig. S11A, C). The first three DFs together account for 100% of the variance in the dataset (DF1=56.68%, DF2=31.75%, DF3=11.57%; *SI Appendix*, Table S15). In the ecospace formed by DF1 and DF2, the tropical and cold communities are well separated from each other and the remaining communities (*SI Appendix*, Fig. S11A). In contrast, the arid and temperate communities overlap in the ecospace. However, in the ecospace formed by DF1 and DF3, all types of extant, small-bodied mammalian communities segregate well (*SI Appendix*, Fig. S11C). DF1 is strongly positively correlated with omnivory, frugivory, arboreality, and negatively correlated with very small body size (< 32 g), herbivory, and saltatorial locomotion (*SI Appendix*, Table S15 and Fig. S11B, D). DF2 is strongly correlated with medium to large body size (128–2048 g), frugivory, arboreality, and negatively correlated with very small body size (< 32 g), carnivory, and fossoriality (*SI Appendix*, Table S15 and Fig. S11B, D). DF3 shows strong positive correlation with the carnivory and scansoriality and negative correlation with fossoriality and saltatorial locomotion (*SI Appendix*, Table S15 and Fig. S11D, F). In total, the DFA correctly classified 84.69% of the communities (83.33% of tropical communities, 72.00% of arid communities, 90% of temperate communities, and 93.10% of cold communities), and 15 of 98 communities were misclassified (*SI Appendix*, Table S17). Tropical communities are characterized by mammals of above the small body-size category (> 128 g), frugivorous and omnivorous diets, and arboreal locomotion (*SI Appendix*, Figs. S5B). Cold communities strongly segregate by herbivorous, gliding, semiaquatic, semifossorial, and saltatorial mammals. Although temperate and arid communities both have many mammals of the very small body-size category (< 32 g), temperate communities differ from arid ones in having more carnivorous, insectivorous, and scansorial mammals; whereas arid communities tend to have more mammals with granivorous diets and fossorial locomotion (*SI Appendix*, Fig. S11E, F).

The DFA clearly separates communities in the ecospace according to the eight vegetation types (*SI Appendix*, Fig. S12). The first three DFs account for 87.02% of variance of the dataset (DF1=56.00%, DF2=19.81%, DF3=11.21%; *SI Appendix*, Table S15). In the ecospace formed by DF1 and DF2, tropical rain forest, tropical seasonal forest, and savanna communities are well separated from all other vegetation types (*SI Appendix*, Fig. S12A), whereas the temperate forest communities are well separated from all others in the ecospace formed by DF1 and DF3 (*SI Appendix*, Fig. S12C). Most communities related to open habitats (grasslands, shrublands, and deserts) largely overlap (*SI Appendix*, Fig. S12A, C, E). DF1 is strongly positively correlated with medium to large body size (128–2048 g), frugivory, and arboreality (*SI Appendix*, Table S15 and Fig. S12B, D). Tropical rain forest and tropical seasonal forest communities are separated from others, primarily due to their mammals of the medium body-size category or larger (> 128 g), frugivory, and arboreality (*SI Appendix*, Figs. S12A–D). DF2 is strongly negatively correlated with omnivory and terrestrial locomotion (*SI Appendix*, Table S15 and Fig. S12B, D), which drives savanna communities to form a relatively distinct grouping (*SI Appendix*, Fig. S11A). DF3 is strongly positively correlated with very small (< 32 g) and very large (> 2048 g) body size, carnivorous and omnivorous diets, and gliding, scansorial, terrestrial, and semiaquatic locomotion (*SI Appendix*, Table S15 and Fig. S12D, F). As a result, boreal and temperate forest communities segregate from most open-habitat communities (savannas, grasslands, shrublands, and deserts) in the ecospace formed by DF1 and DF3 (*SI Appendix*, Fig. S12C). In total, the DFA correctly classified 70.41% of the communities (75.00% of tropical rain forest communities, 62.50% of tropical seasonal forest communities, 100% of savanna communities, 55% of grassland communities, 55.56% of shrubland communities, 77.78% of desert communities, 87.50% of temperate forest communities, and 77.78% of boreal forest communities), and 29 of 98 communities were misclassified (*SI Appendix*, Table S18).

**Paleoenvironmental inference.** The DFA predictions of the environmental types of the extant, small-bodied mammalian communities was relatively reliable. Thus, we used those results as a framework to infer the paleoenvironments of five extinct mammaliaform communities. For each extinct community, we inferred paleoenvironment using three different environmental criteria (habitat openness, climate type, vegetation type) (*SI Appendix*, Table S19). The inferences varied considerably across these criteria. Two Mid-Late Jurassic mammaliaform communities (Jiulongshan and Tiaojishan) were both inferred as having lived in a closed-habitat, cold-climate, or tropical rain forest environment, respectively, depending on the environmental criterion

used. In contrast, the inferred paleoenvironments of the two Early Cretaceous mammaliaform communities were drastically different when using habitat openness vs. climate type, despite both paleoenvironments being inferred as tropical seasonal forest when using vegetation type. The Lujiatun mammaliaform community was reconstructed in a closed, tropical environment, and the Dawangzhangzi mammaliaform community in an open, arid environment. Unlike the other extinct mammaliaform communities, the Eocene Messel mammalian community was reconstructed in an open, tropical rain forest in a tropical climate.

In addition, DF1 of each analysis shows strong correlations with MAT and MAP (*SI Appendix*, Figs. S13B, D, F, S14). We used these correlations to predict the paleo MAT and MAP for each extinct mammaliaform community (*SI Appendix*, Table S20). We used these predicted paleo MAT and MAP to plot each extinct community in Whittaker biome plots. The Jiulongshan community (Mid-Late Jurassic, China) falls in either temperate forest or shrubland/woodland, the Tiaojishan community (Mid-Late Jurassic, China) in either tropical seasonal forest/savanna or shrubland/woodland, the Lujiatun-Tiaojishan community (Early Cretaceous, China) in temperate seasonal forest or tropical seasonal forest/savanna, the Dawangzhangzi community (Early Cretaceous, China) in shrubland/woodland, and the Messel community (Eocene, Germany) in either shrubland/woodland or tropical seasonal forest/savanna (*SI Appendix*, Table S19 and Fig. S15). The results of the inferences from these Whittaker biome plots show some discrepancies with the paleoenvironmental inferences from the DFAs as well as with other paleoenvironmental proxy data from the literature.

## Supplementary figures

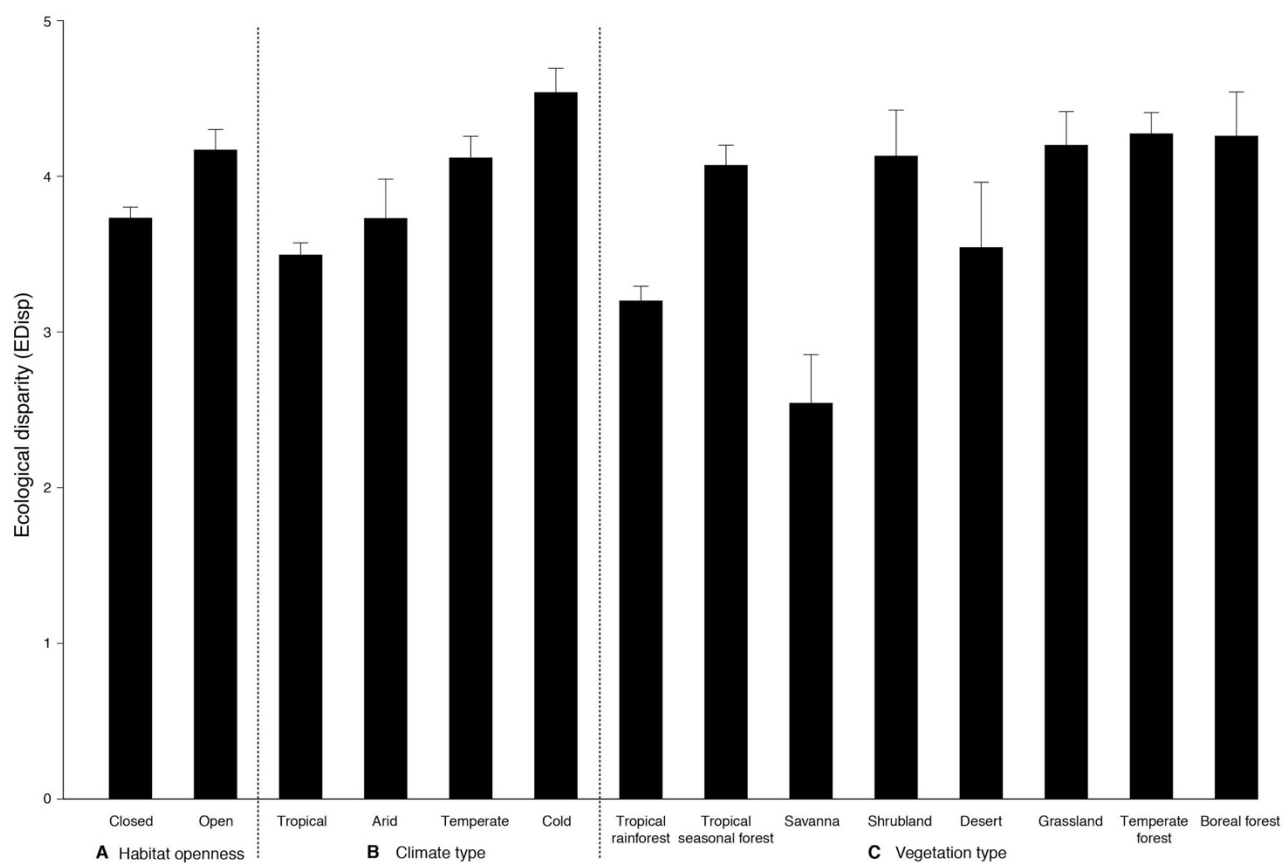

**Fig. S1.** Ecological disparity (EDisp) of 98 extant, small-bodied mammalian communities arranged by environmental classification: habitat openness (A), climate type (B), and vegetation type (C).

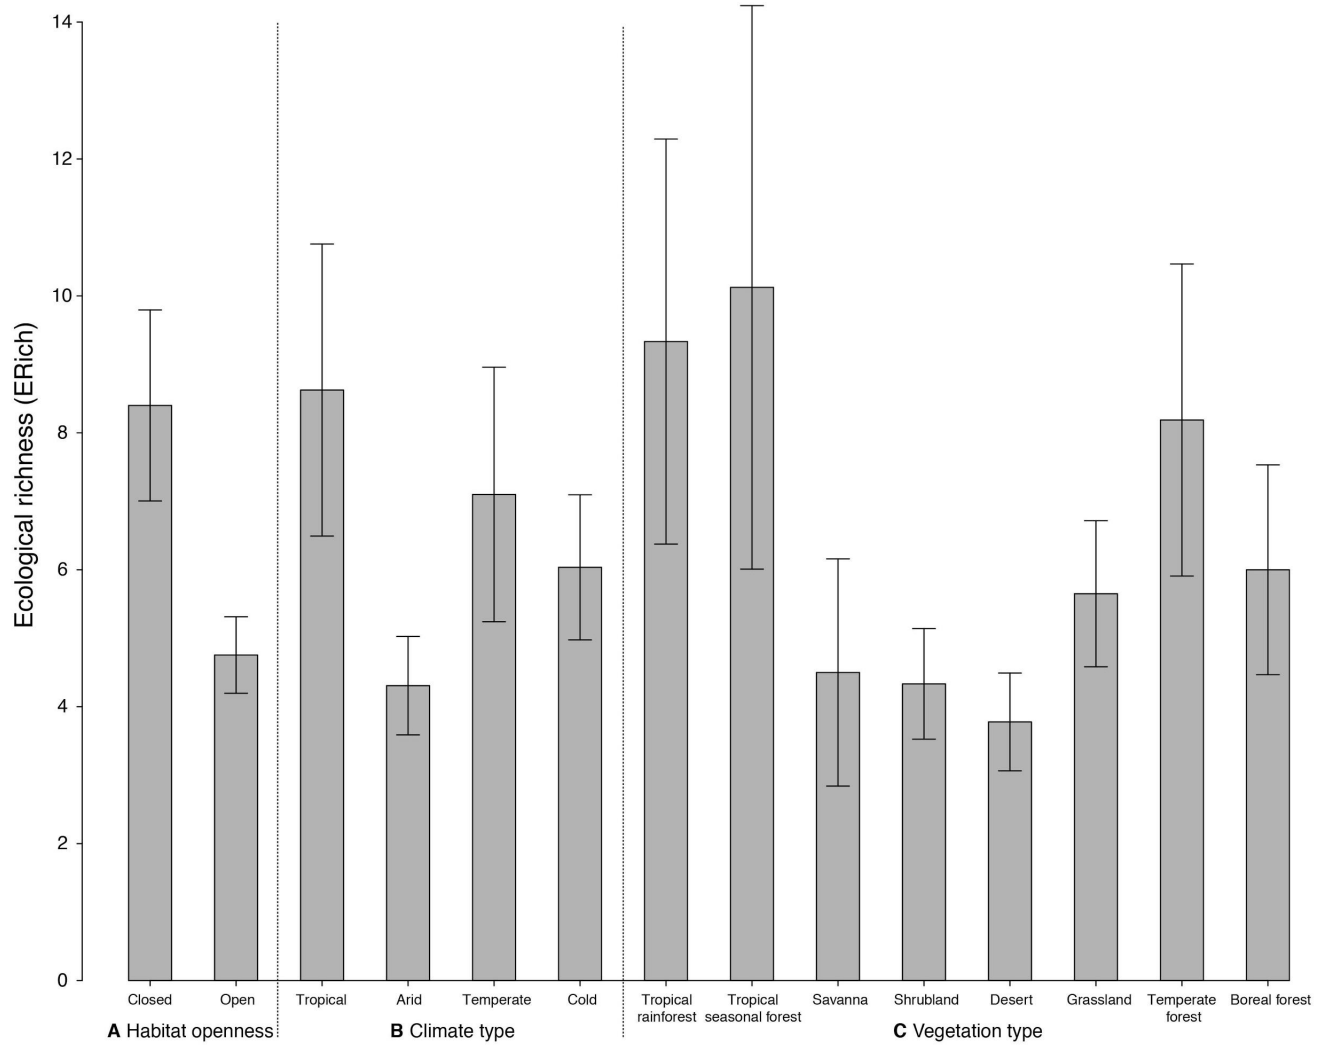

**Fig. S2.** Ecological richness (ERich) of 98 extant, small-bodied mammalian communities arranged by environmental classification: habitat openness (A), climate type (B), and vegetation type (C).



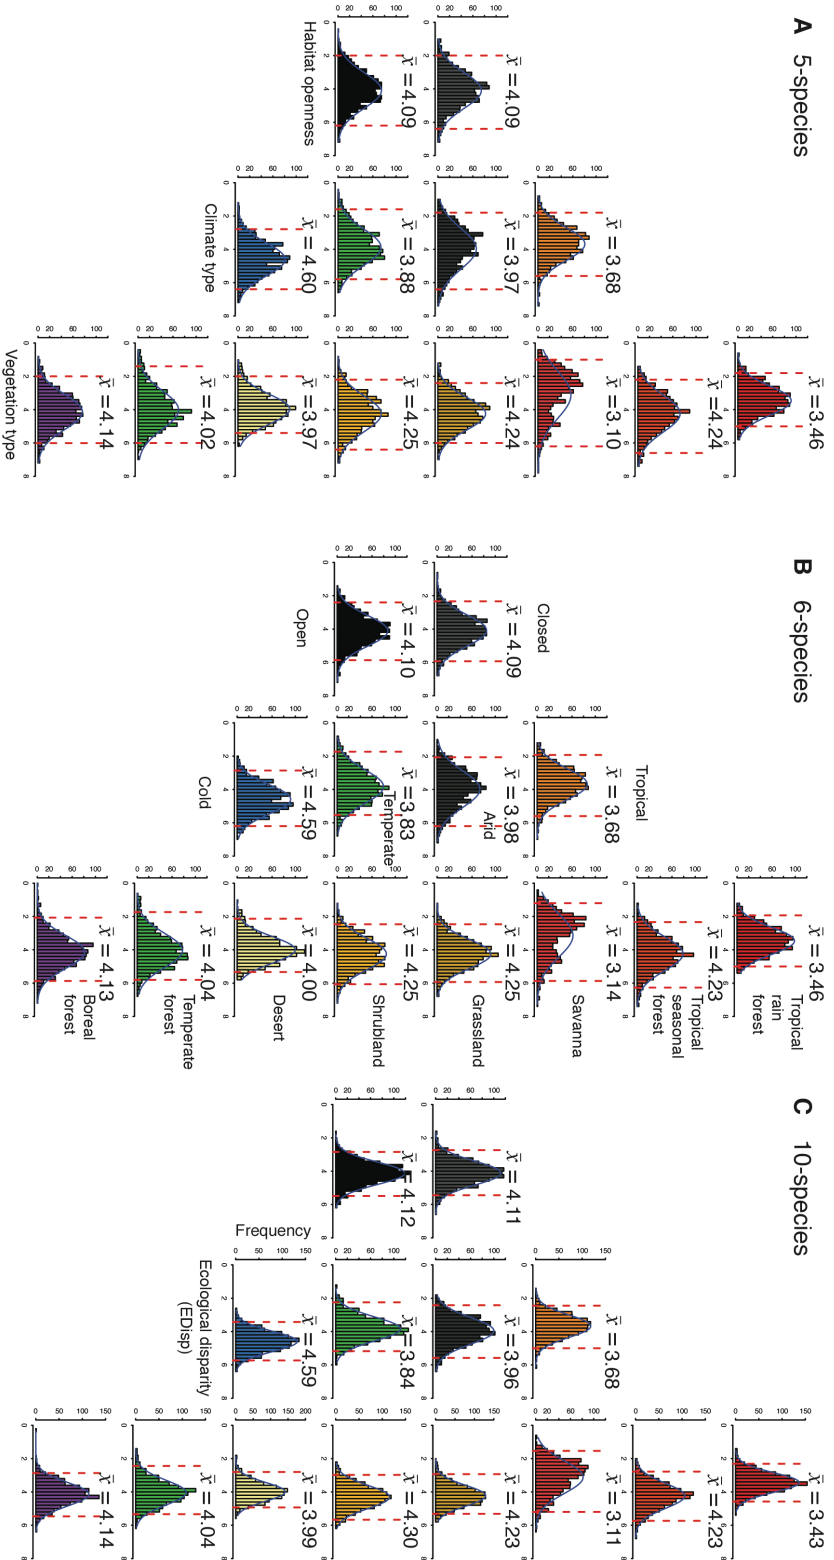

**Fig. S3.** Resampled ecological disparity by habitat openness, climate type, and vegetation type. The numbers of species (five, six, and ten) correspond to the number of species in the Mesozoic mammaliaform communities. The mean value of each resampled ecological disparity is listed above its histogram.

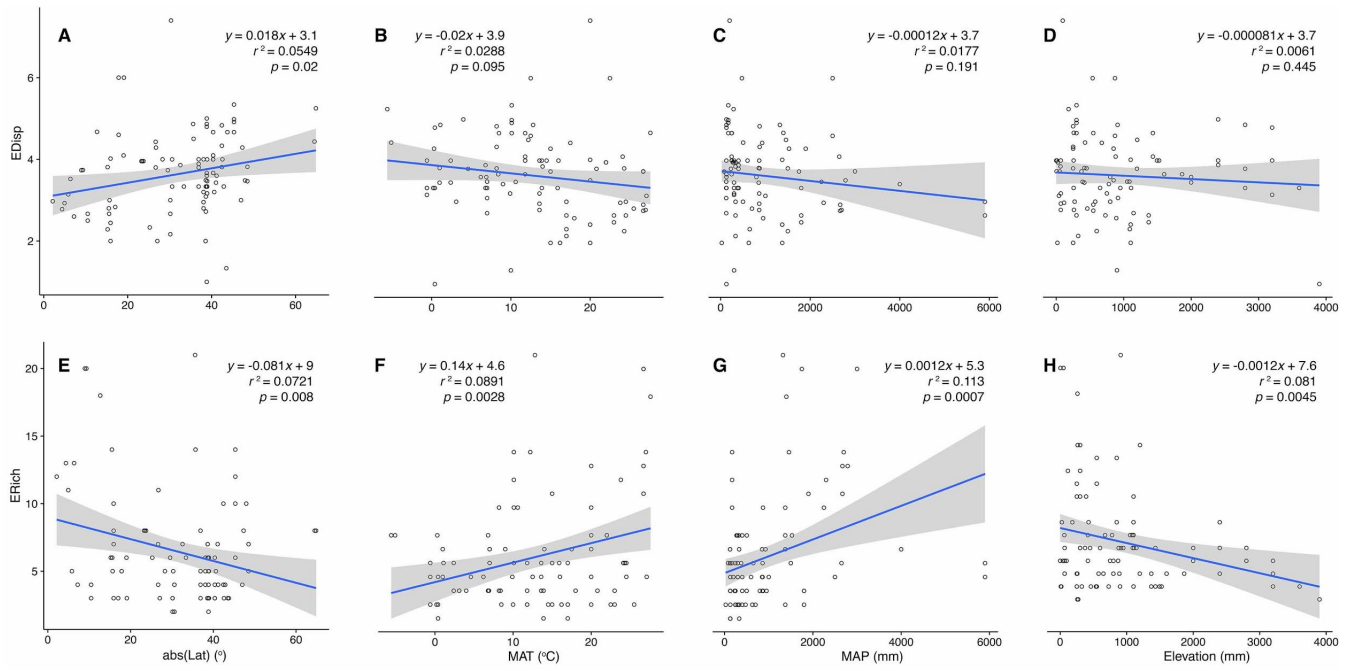

**Fig. S4.** Linear regression analyses of ecological disparity (EDisp, A–D) and ecological richness (ERich, E–H) of 98 extant small-bodied mammalian communities versus environmental factors: latitude (A, E), mean annual temperature (B, F), mean annual precipitation (C, G), and elevation (D, H). Grey area indicates the 95% confidence intervals. Abbreviations: abs, absolute value; Lat, latitude; MAP, mean annual precipitation; MAT, mean annual temperature.

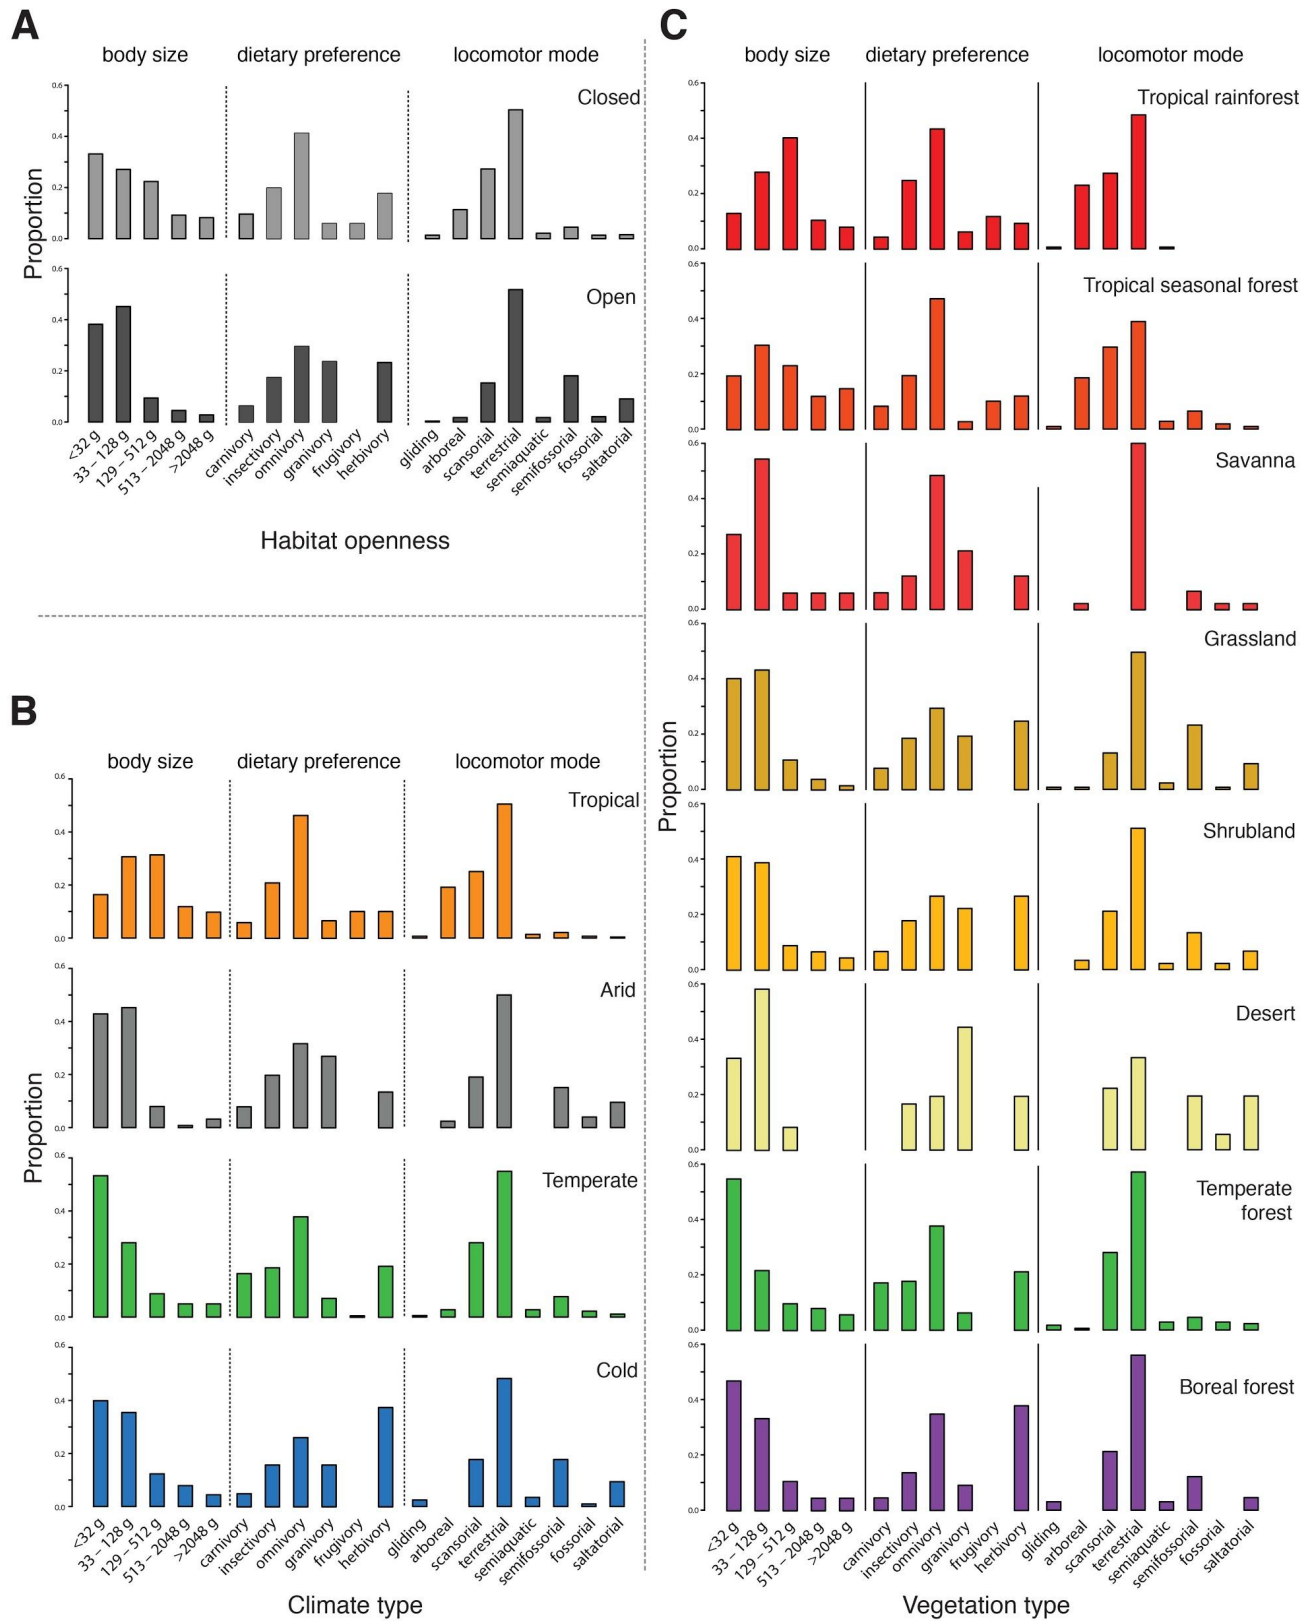

**Fig. S5.** Proportion (%) of ecological parameters for 98 extant, small-bodied mammalian communities arranged by environmental classification: habitat openness (A), climate type (B), and vegetation type (C).

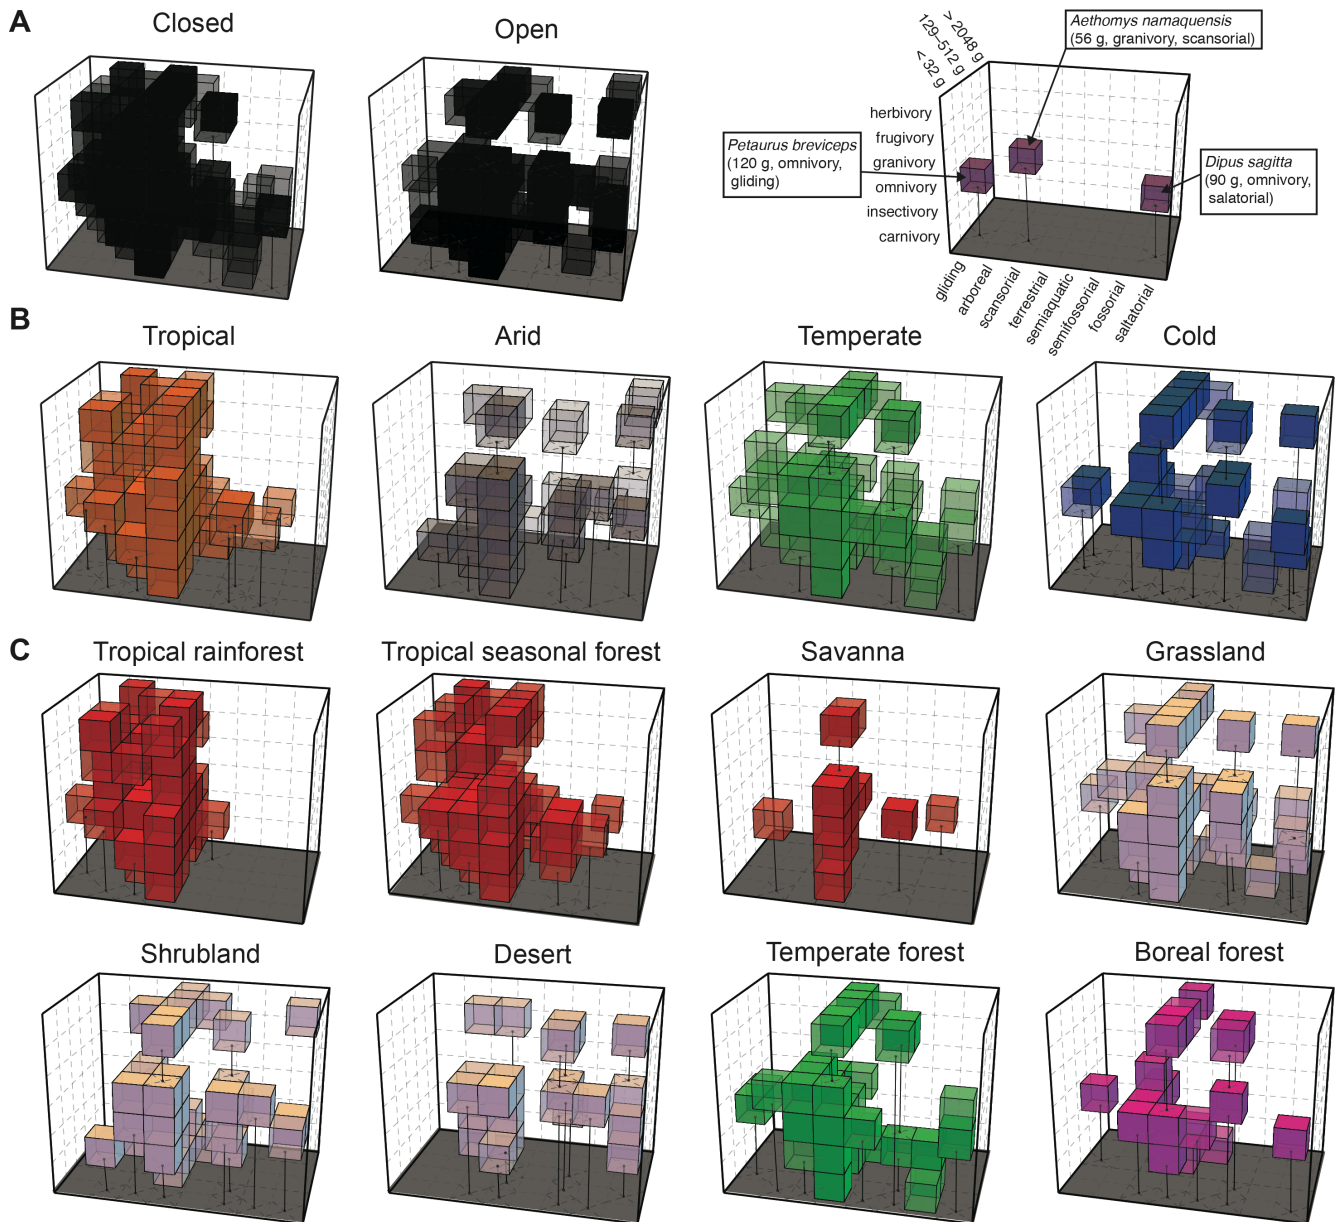

**Fig. S6.** Composite plots of ecospace occupation of 98 extant, small-bodied mammalian communities arranged by environmental classification: habitat openness (A), climate type (B), and vegetation type (C). The composite plots show all occupied eco-cells for the communities in that environmental type. Each composite plot was generated by plotting all eco-cells in each environmental type. See *SI Appendix*, Materials and Methods for details.

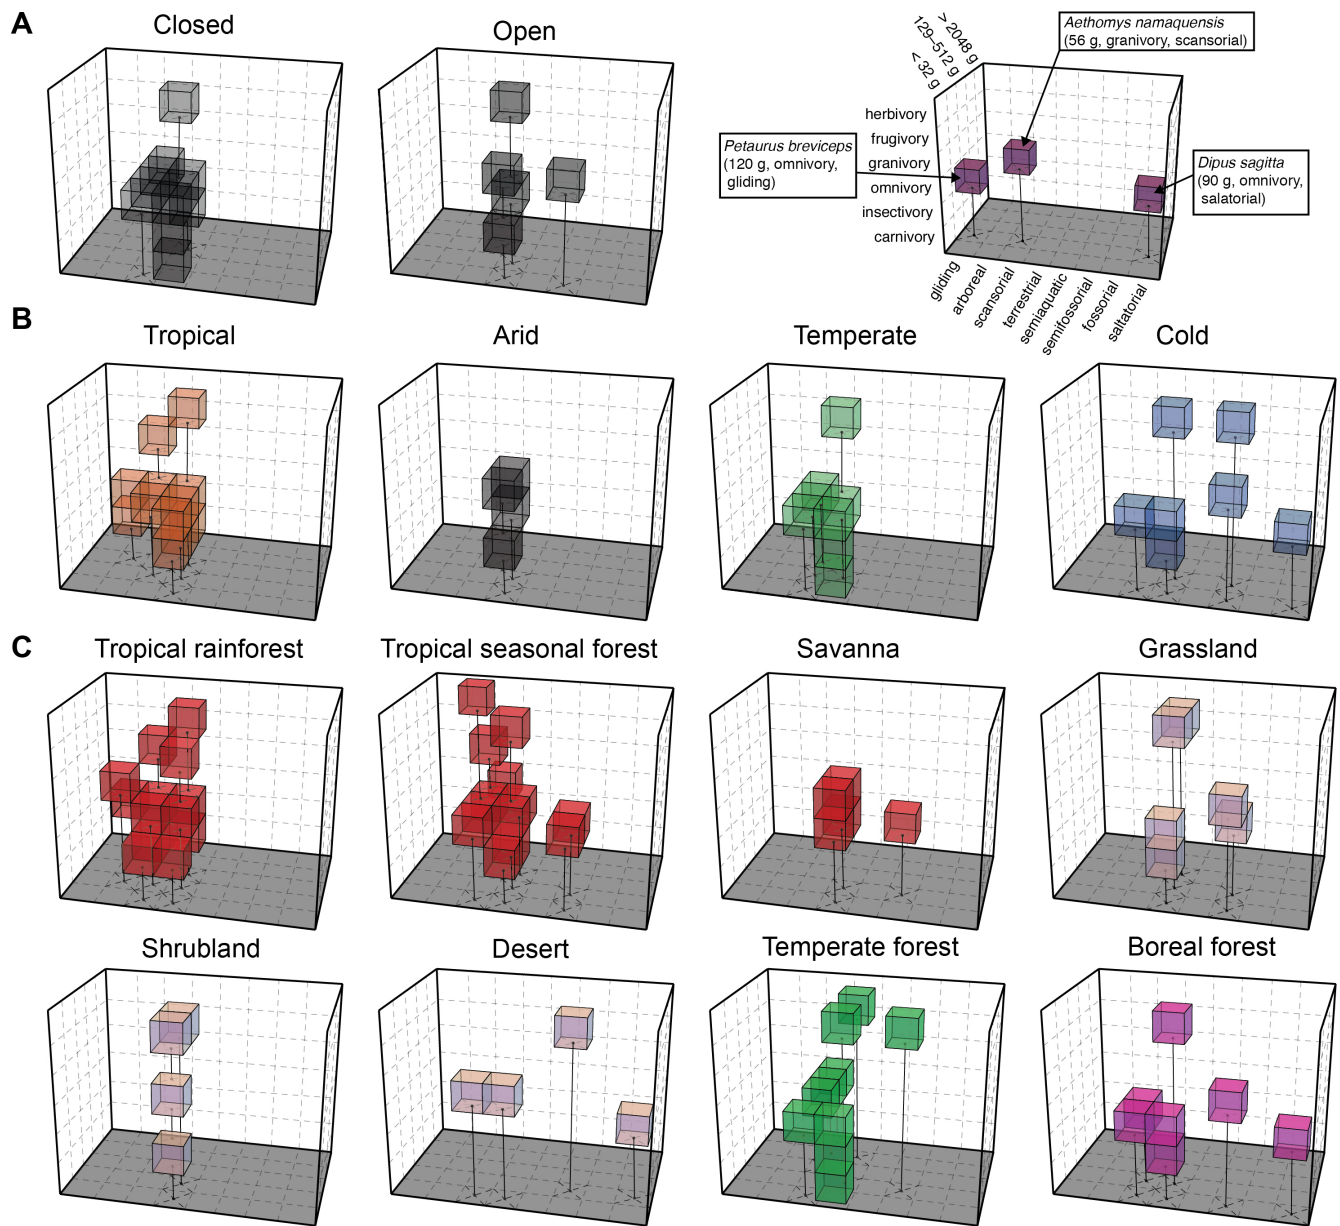

**Fig. S7.** Exemplar plots of ecospace occupation of 98 extant, small-bodied mammalian communities arranged by environmental classification: habitat openness (A), climate type (B), and vegetation type (C). Each exemplar plot was generated by bootstrapping the eco-cells in each environmental type. See *SI Appendix*, Materials and Methods for details.

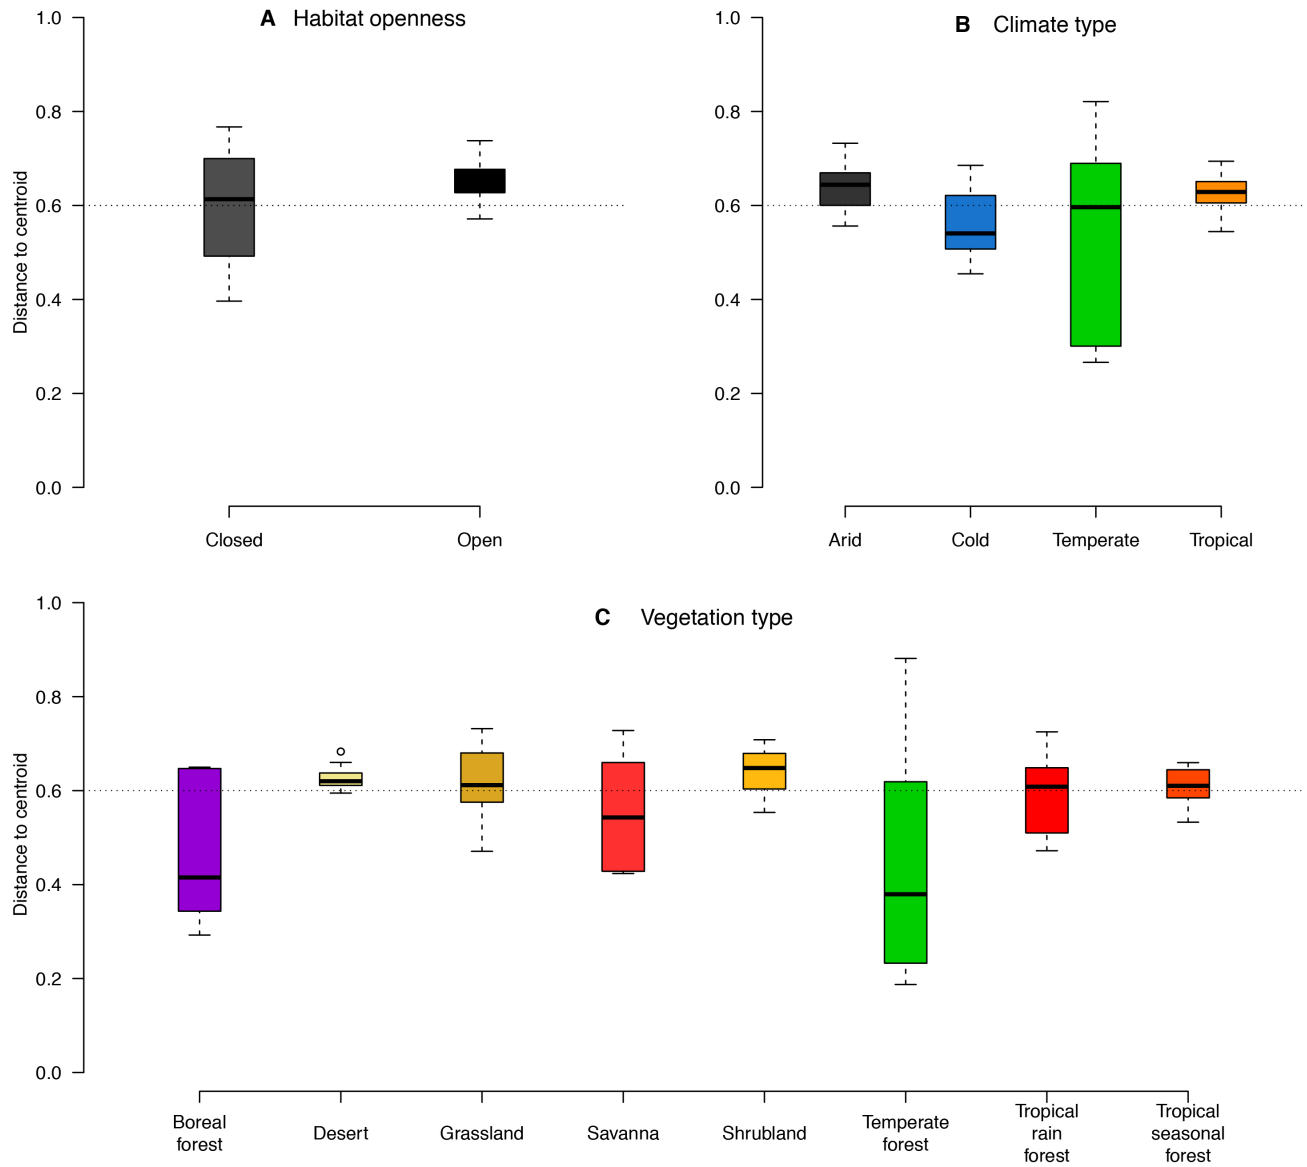

**Fig. S8.** Beta diversity of ecospace occupation of extant, small-bodied mammalian communities arranged by environmental classification: habitat openness (A), climate type (B), and vegetation type (C).



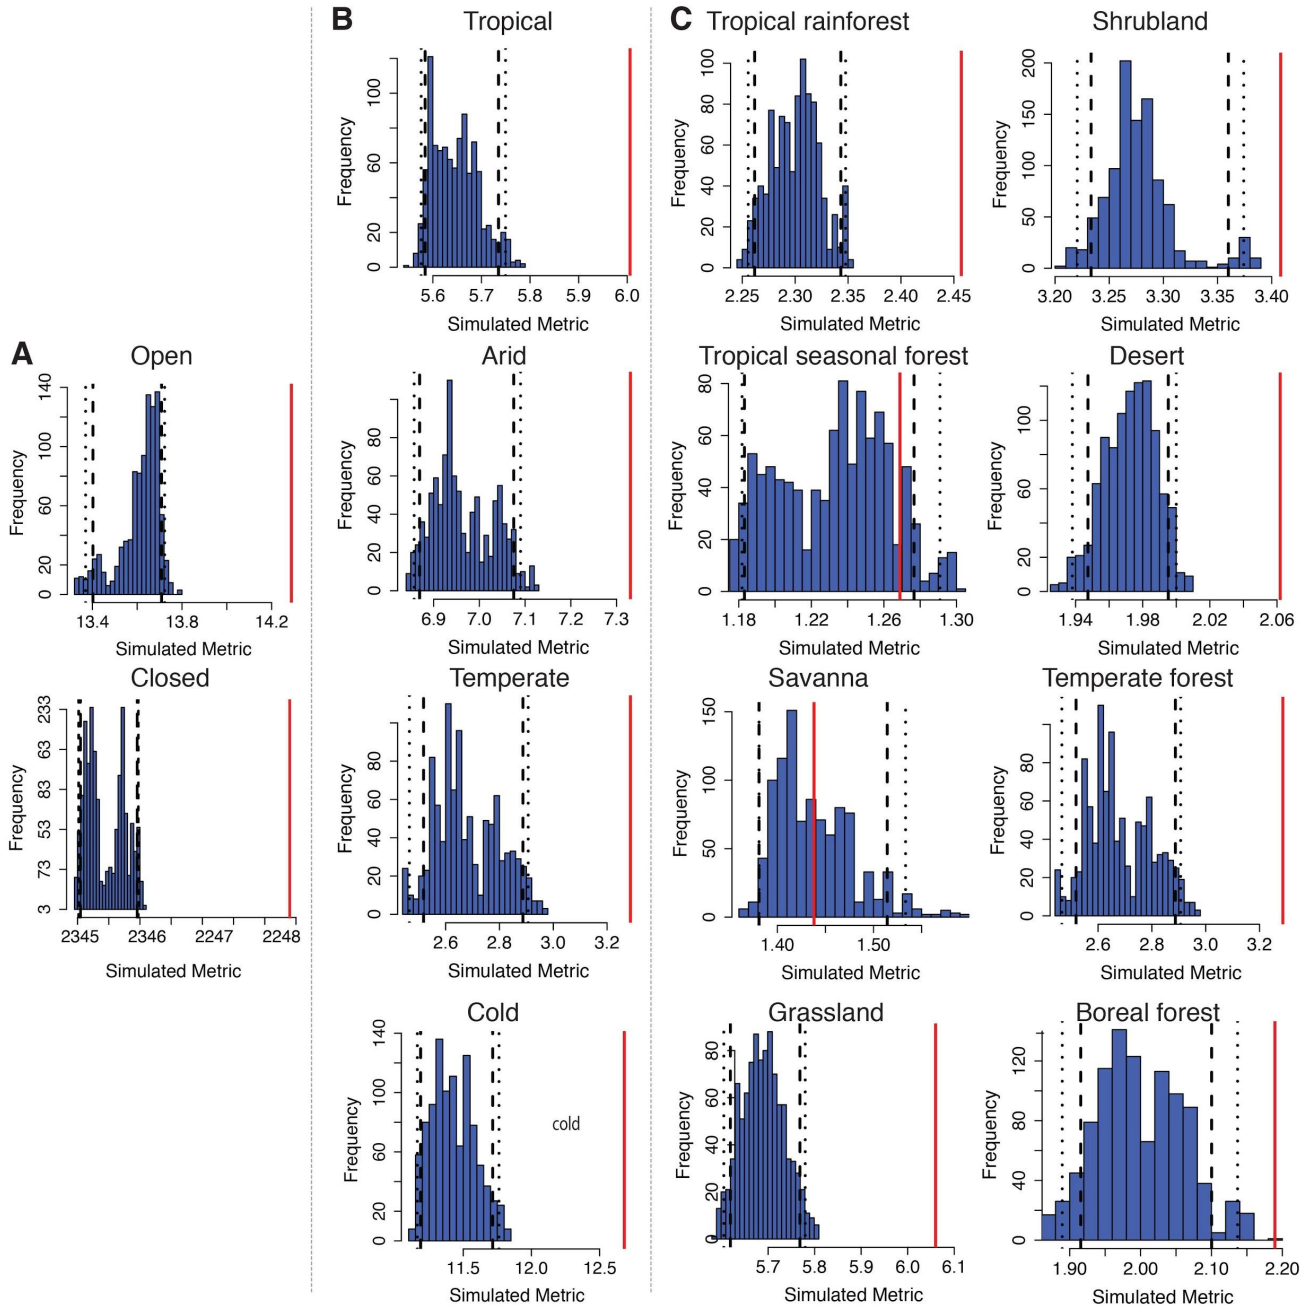

**Fig. S9.** Results of the null model tests for significance of patterns of ecospace occupation arranged by environmental classification: habitat openness (A), climate type (B), and vegetation type (C). The solid red vertical lines indicate the observed metrics for the collected data. The long-dash lines indicate the 95% one-tailed cutoff point, and the short-dash lines indicate the 95% two-tailed cutoff points.

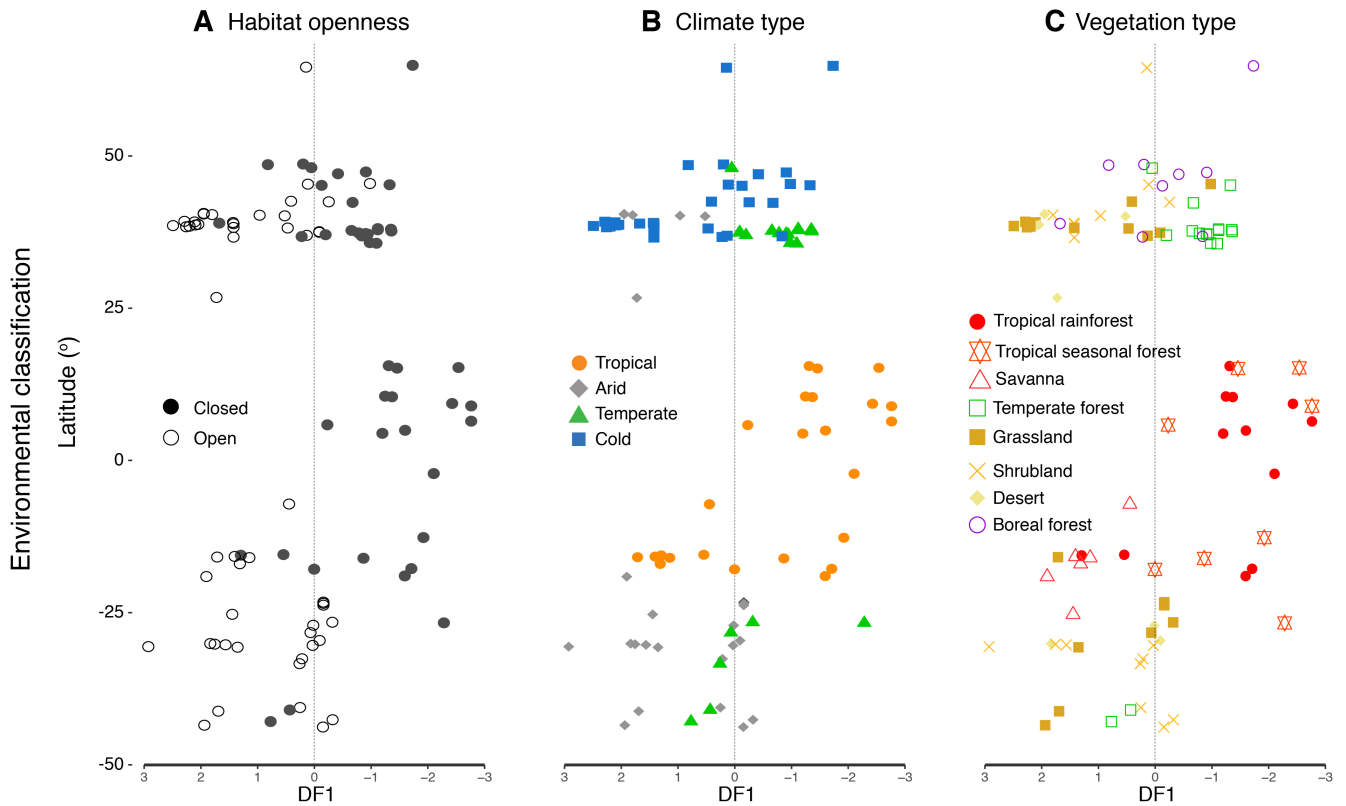

**Fig. S10.** Ordination of habitat openness of 98 extant, small-bodied mammalian communities by DF1 scores and latitude. The plots are annotated by environmental classification: habitat openness (A), climate type (B), and vegetation type (C). Abbreviations: DF1, discriminant function 1, MAP, mean annual precipitation; MAT, mean annual temperature.



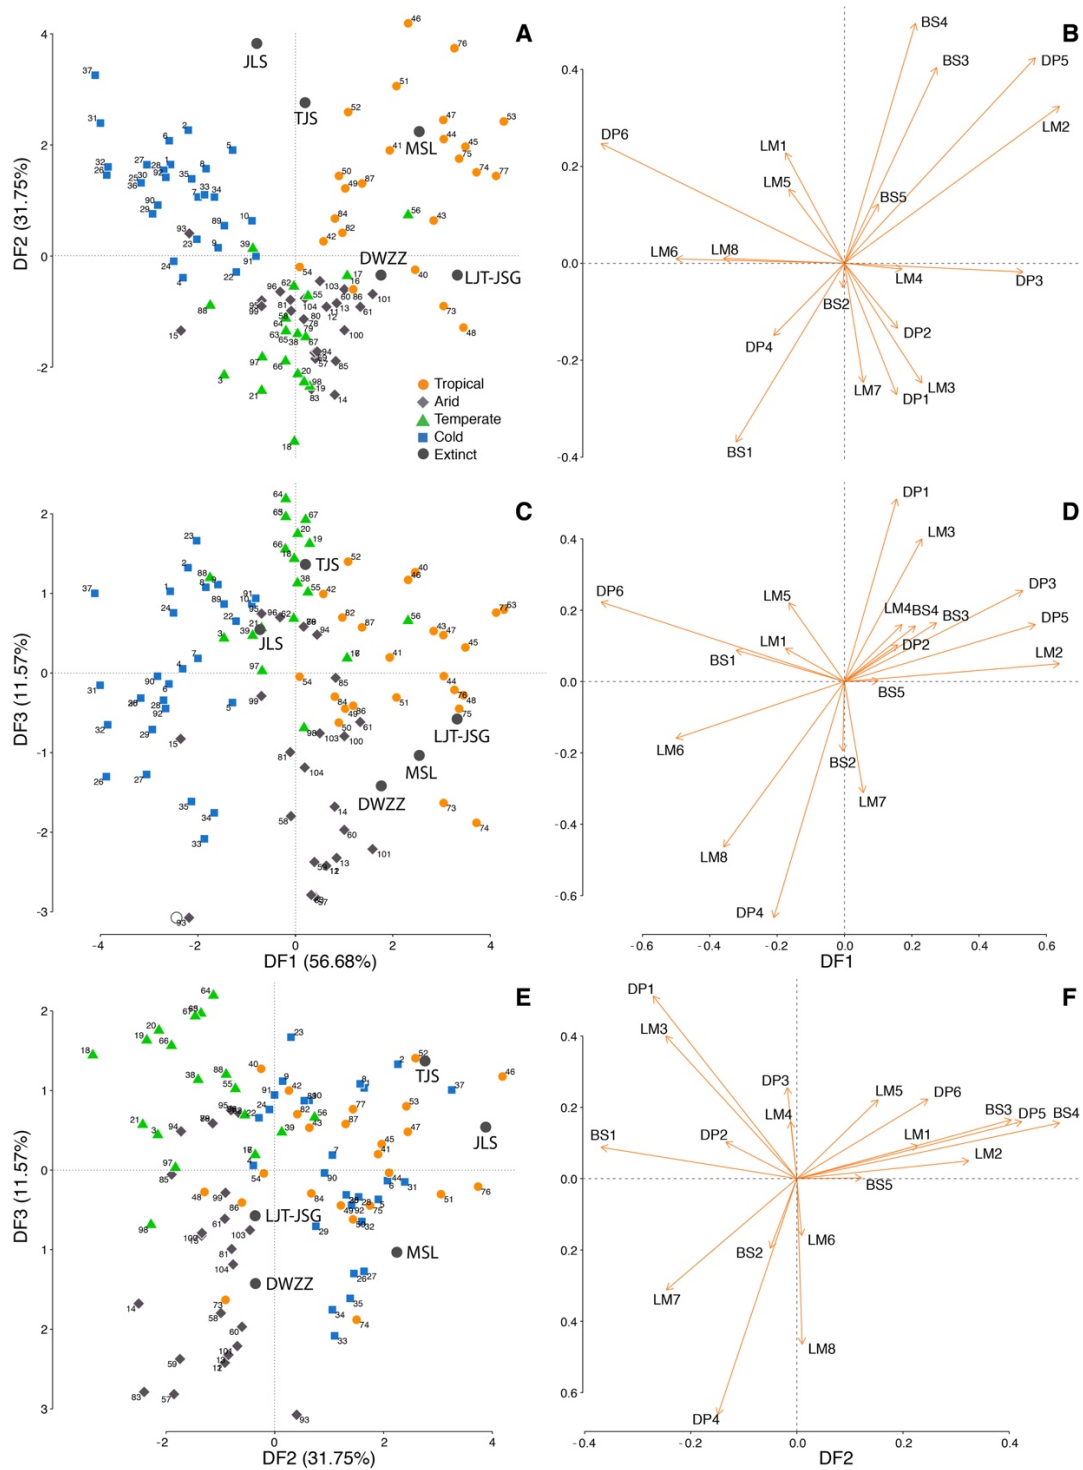

**Fig. S11.** Projection of five extinct mammaliaform communities in the discriminant function analysis (DFA) of four climate types. A, Plot of discriminant function (DF) 1 vs. DF2; C, Plot of DF1 vs. DF3; E, Plot of DF2 vs. DF3; B, D, and F, plots of structure correlations between the ecological parameters and the first three DFs. Abbreviations: DWZZ, Dawangzhangzi mammaliaform community (Early Cretaceous, China); JLS, Jiulongshan mammaliaform community (Mid-Late Jurassic, China); LJT-JSG, Lujiatun-Jianshangou mammaliaform community (Early Cretaceous, China); MSL, Messel mammalian community (Eocene, Germany); TJS, Tiaojishan mammaliaform community (Mid-Late Jurassic, China). Abbreviations for the ecological parameters with prefixes BS (body size), DP (dietary preference), and LM (locomotor mode) are in Table S2.

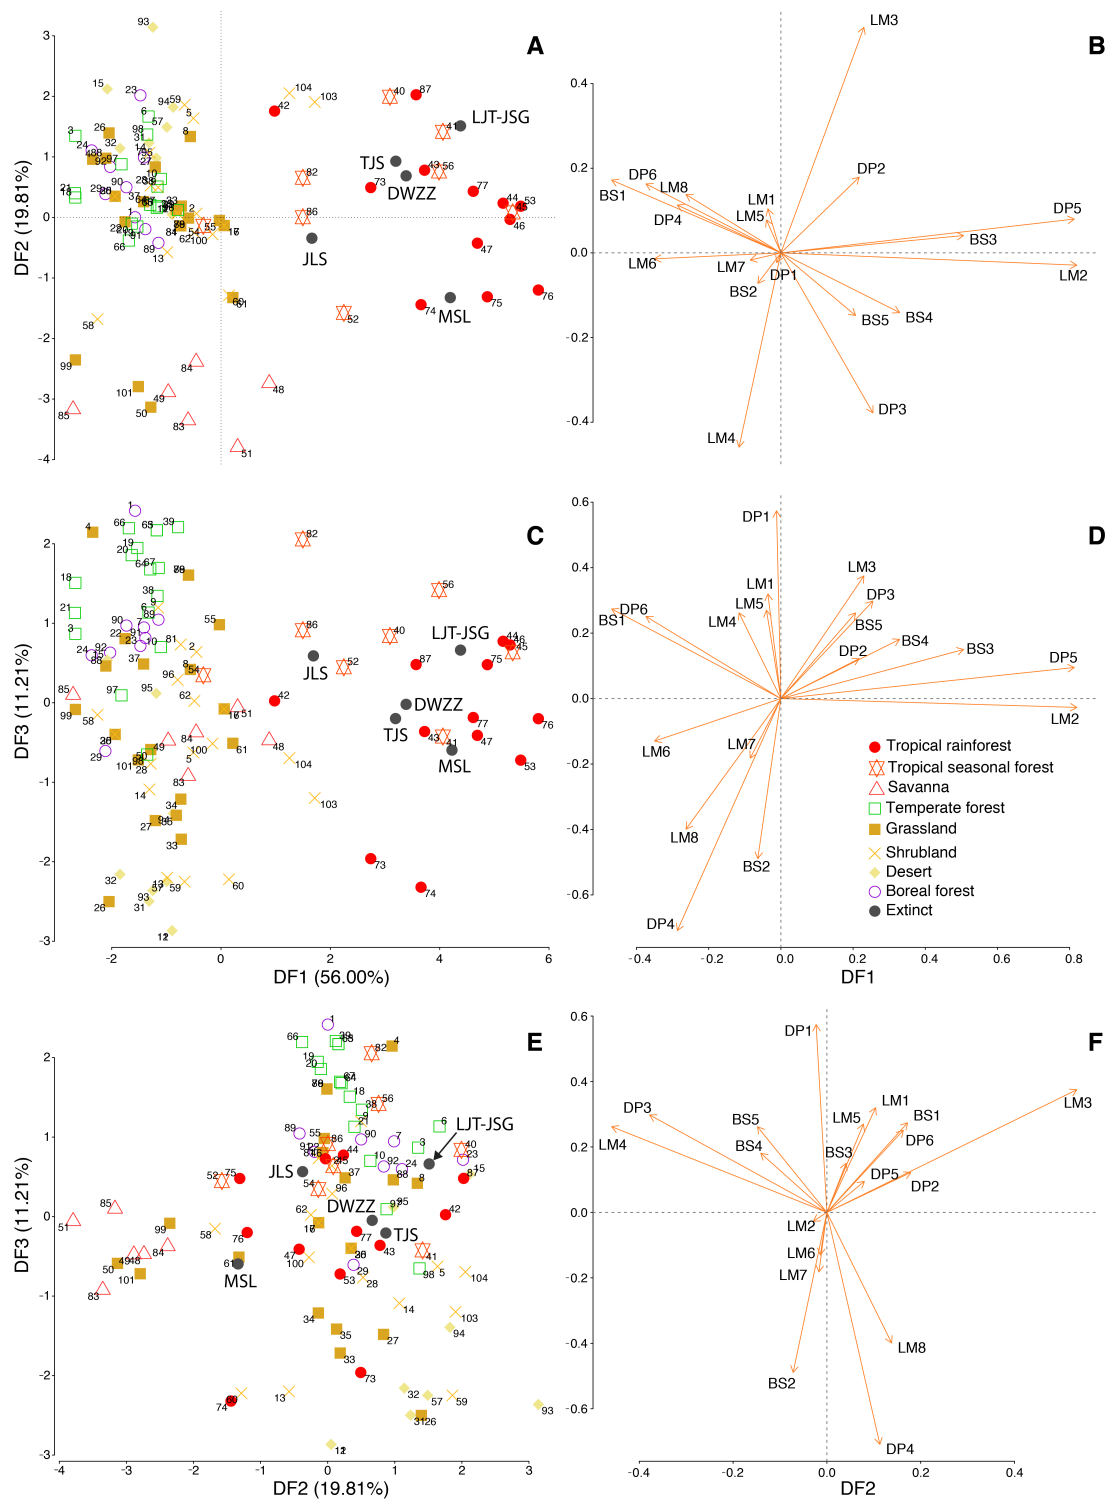

**Fig. S12.** Projection of five extinct mammaliaform communities in the discriminant function analysis (DFA) of eight vegetation types. A, Plot of discriminant function (DF) 1 vs. DF2 from the DFA; C, Plot of DF1 vs. DF3; E, Plot of DF2 vs. DF3; B, D, and F, plots of structure correlations between the ecological parameters and the first three DFs. Abbreviations: DWZZ, Dawangzhangzi mammaliaform community (Early Cretaceous, China); JLS, Jiulongshan mammaliaform community (Mid-Late Jurassic, China); LJT-JSG, Lujiatun-Jianshangou mammaliaform community (Early Cretaceous, China); MSL, Messel mammalian community (Eocene, Germany); TJS, Tiaojishan mammaliaform community (Mid-Late Jurassic, China). Abbreviations for the

ecological parameters with prefixes BS (body size), DP (dietary preference), and LM (locomotor mode) are in Table S2.

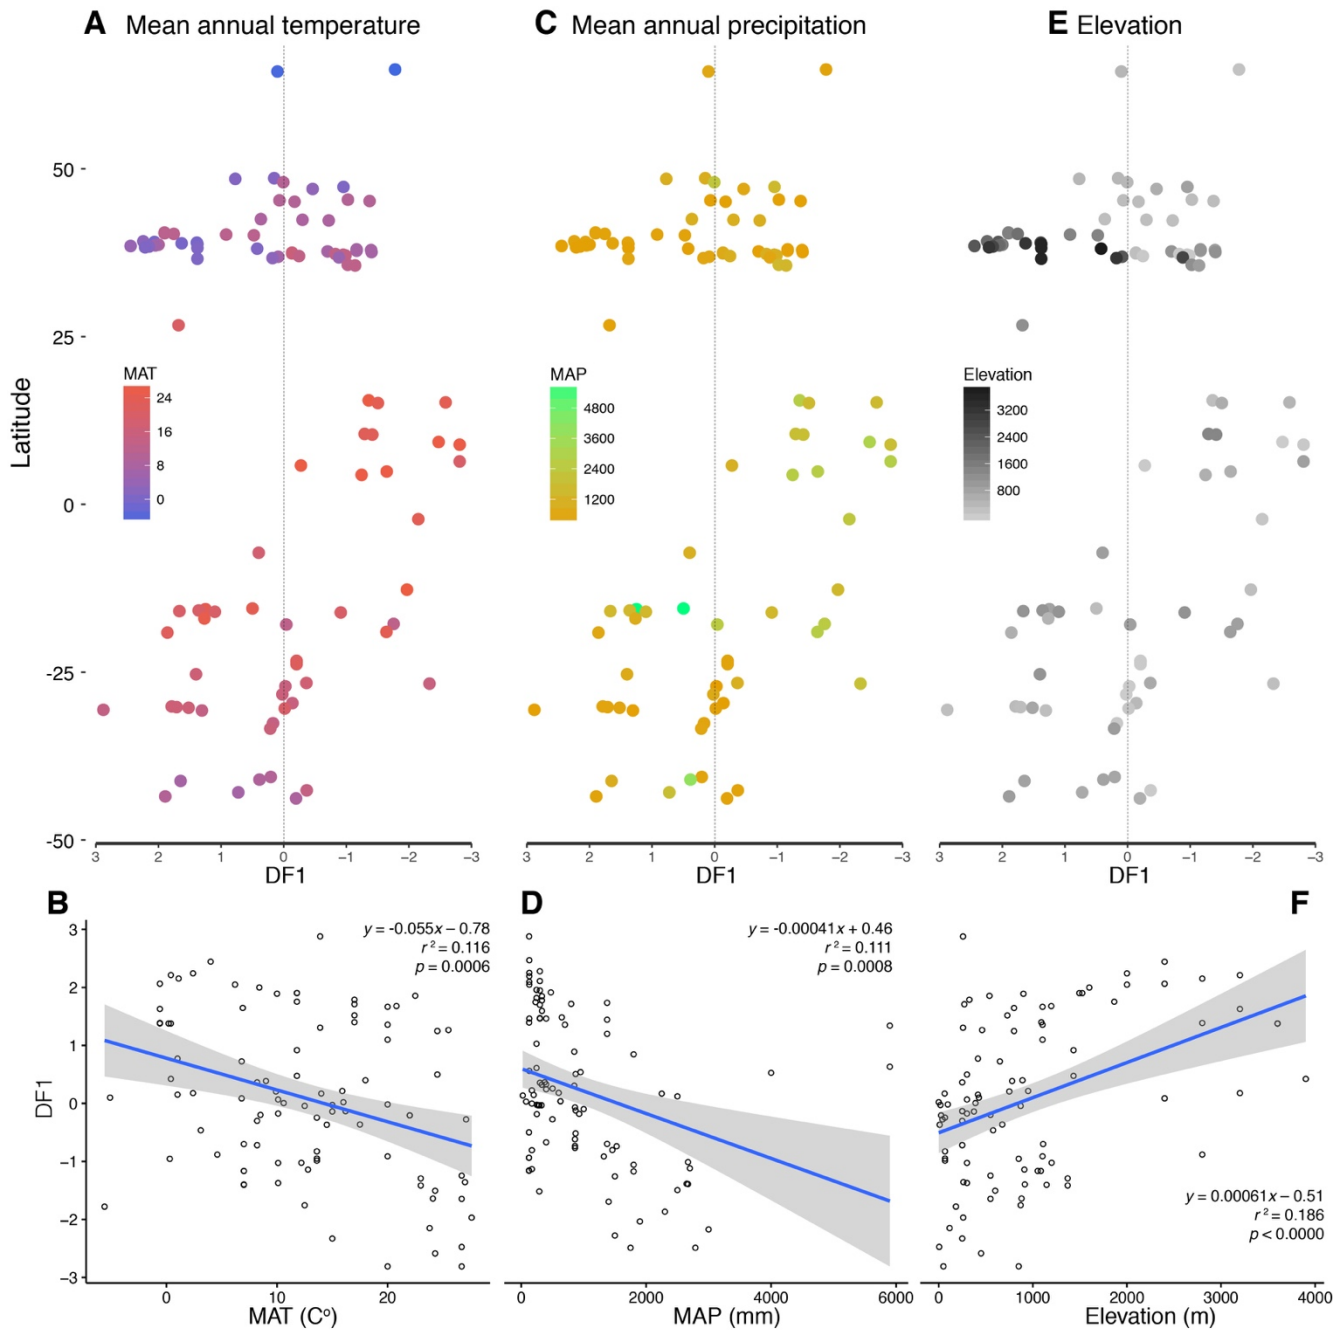

**Fig. S13.** Plot of discriminant function (DF) 1 scores from the discriminant function analysis (DFA) of habitat openness vs. latitude with markers color-coded for environmental factors: MAT (A), MAP (C), and elevation (E); Correlation analysis of the DF1 scores and environmental factors: MAT (B), MAP (D), and elevation (F). Abbreviations: MAP, mean annual precipitation; MAT, mean annual temperature. The blue line and grey shaded area indicate the best fit and 95% confidence interval, respectively.

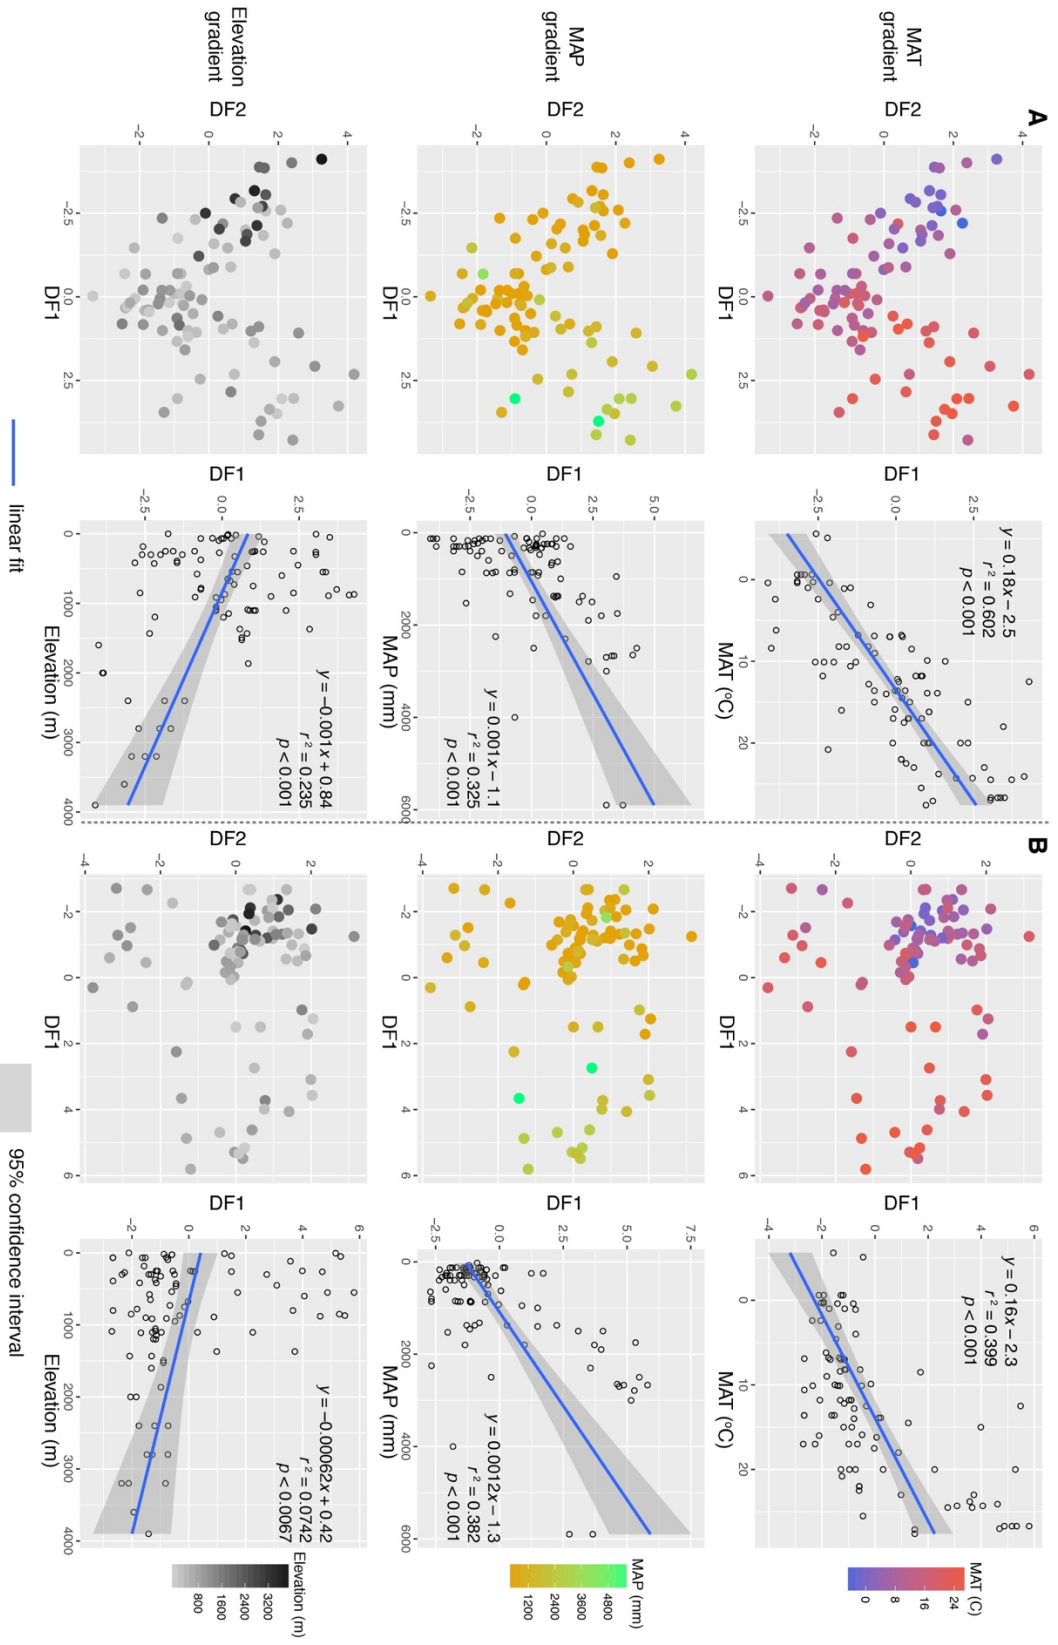

**Fig. S14.** Plots of discriminant function (DF) 1 vs. DF2 of the discriminant function analysis (DFA) of four climate types (A) and eight vegetation types (B) with markers color-coded for environmental factors: MAT, MAP, and elevation (top to bottom). Correlation analysis are of the DF1 scores and the same environmental factors. Abbreviations: MAP, mean annual precipitation; MAT, mean annual temperature.

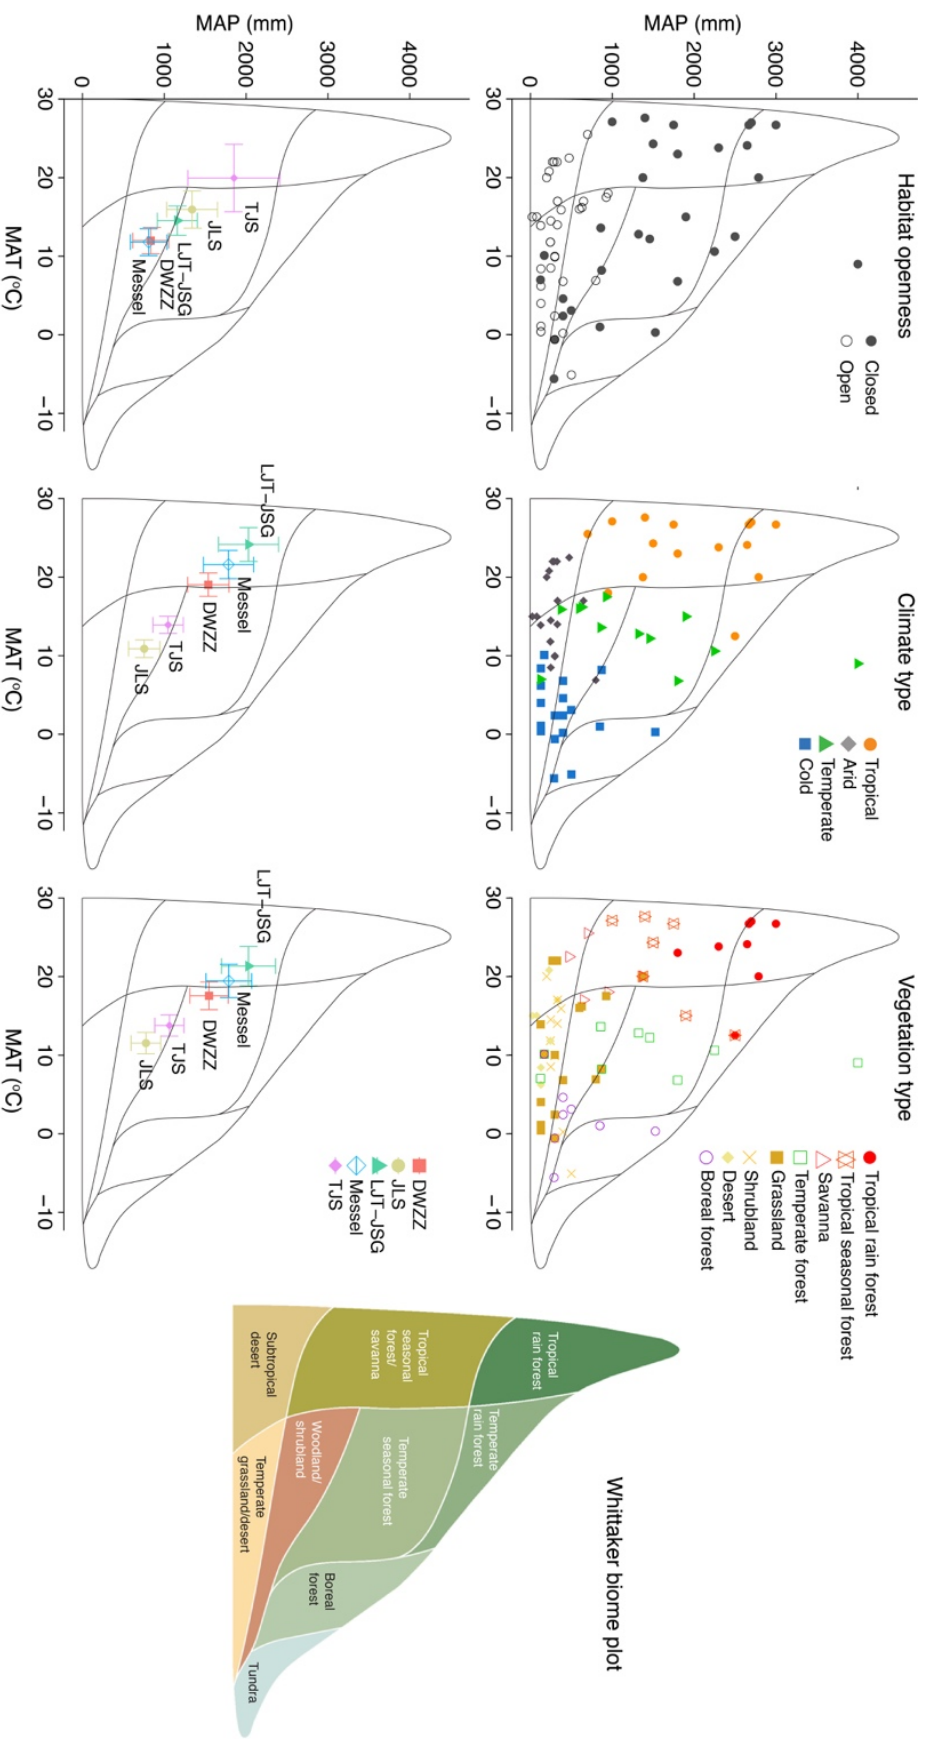

**Fig. S15.** Whitaker biome plot of the 98 extant mammalian communities (top row) according to environmental classification: habitat openness, climate type, and vegetation type (left to right); and the Whitaker biome plot of the inferred mean annual temperature (MAT) and mean annual precipitation (MAP) of four Mesozoic and one Eocene mammalian communities (bottom row) according to the environmental classification (left to right). Abbreviations: DWZZ, Dawangzhangzi mammalian community (Early Cretaceous, China); JLS, Jiulongshan mammalian community (Mid-Late Jurassic, China); LJT-JSG, Lujiatun-Jianshangou community (Early Cretaceous, China); MSL, Messel mammalian community (Eocene, Germany); TJS, Tiaojishan mammalian community (Mid-Late Jurassic, China).



## Supplementary tables

**Table S1.** Mesozoic and Eocene mammaliaform paleocommunity lists and inferred ecological parameters of associated taxa.

| CM <sup>a</sup> | Specimen No <sup>b</sup> | Higher-level taxon | Species <sup>c</sup>                   | Age (Ma) <sup>d</sup>       | Formation   | Locality                    | Biota   | Body size (g) | Dietary preference <sup>e</sup> | Locomotor mode <sup>f</sup> |
|-----------------|--------------------------|--------------------|----------------------------------------|-----------------------------|-------------|-----------------------------|---------|---------------|---------------------------------|-----------------------------|
| TJS             | STM 33-9                 | Haramiyida         | <i>Arboroharamiya jenkinsi</i> (53)    | 160 (15)                    | Tiaojishan  | Mutoudeng                   | Yanliao | 354           | o                               | a                           |
| TJS             | LDN HMF2001              | Haramiyida         | <i>Shenshou lui</i> (54)               | 160.89–160.25 (55)          | Tiaojishan  | Daxishan, Linglongta        | Yanliao | 300           | o                               | a (sc)                      |
| TJS             | BMNH PM003253            | Haramiyida         | <i>Xianshou songae</i> (54)            | 160.89–160.25 (55)          | Tiaojishan  | Daxishan, Linglongta        | Yanliao | 40            | o                               | a (sc)                      |
| TJS             | IVPP V16707              | Haramiyida         | <i>Xianshou linglong</i> (54)          | 160.89–160.25 (55)          | Tiaojishan  | Daxishan, Linglongta        | Yanliao | 83            | o                               | a (sc)                      |
| TJS             | BMNH 2940                | Haramiyida         | <i>Maiopatagium furculiferum</i> (56)  | 160.89–160.25 (55)          | Tiaojishan  | Daxishan, Linglongta        | Yanliao | 120-178       | h                               | g                           |
| TJS             | BMNH 1142                | Multituberculata   | <i>Rugosodon eurasiaticus</i> (57)     | 160.89–160.25 (55)          | Tiaojishan  | Daxishan, Linglongta        | Yanliao | 65–80         | o                               | sc                          |
| TJS             | BMNH PM1143              | Eutheria           | <i>Juramaia sinensis</i> (58)          | 160.7±0.4 (58)              | Tiaojishan  | Daxigou, Jianchang          | Yanliao | 13–15         | i                               | sc (a)                      |
| TJS             | BMNH 2942                | Haramiyida         | <i>Vilevolodon diplomylos</i> (59)     | 160±0.99 (60)               | Tiaojishan  | Qinglong County, Hebei      | Yanliao | 35-55         | o                               | a                           |
| TJS             | HG M018                  | Haramiyida         | <i>Arboroharamiya allinopsoni</i> (61) | 160±0.99 (60)               | Tiaojishan  | Nanshimen, Gangou           | Yanliao | 17-87         | o                               | g                           |
| TJS             | BMNH 131735              | Docodonta          | <i>Docofossor brachydactylus</i> (62)  | 160±0.99 (60)               | Tiaojishan  | Nanshimen, Gangou           | Yanliao | 9–17          | i                               | f                           |
| JLS             | BMNH 001138              | Docodonta          | <i>Agilodocodon scansorius</i> (63)    | 164 (63)                    | Jiulongshan | Daohugou, Ningcheng         | Yanliao | 27–40         | o                               | a                           |
| JLS             | PMOL AM00007A            | Haramiyida         | <i>Megaconus mammaliaformis</i> (64)   | 165-164 (60, 65)            | Jiulongshan | Daohugou, Ningcheng         | Yanliao | 120–280       | o                               | t                           |
| JLS             | JZMP 04-117              | Docodonta          | <i>Castorocauda lutrasimilis</i> (66)  | 165-164 (60, 65)            | Jiulongshan | Daohugou, Ningcheng         | Yanliao | 500–800       | c                               | sq                          |
| JLS             | IVPP V14739              | Eutriconodonta     | <i>Volaticotherium antiquum</i> (67)   | 165-164 (60, 65)            | Jiulongshan | Daohugou, Ningcheng         | Yanliao | 70            | i                               | g                           |
| JLS             | CAG S040811              | Yinothoria         | <i>Pseudotribos robustus</i> (68)      | 164 (68)                    | Jiulongshan | Daohugou, Ningcheng         | Yanliao | 19            | i                               | t                           |
| DWZZ            | CAG S01-IG1              | Eutheria           | <i>Eomaia scansoria</i> (69)           | 122.2–124.6 (70–72)         | Yixian      | Dawangzhangzi, Lingyuan     | Jehol   | 11–49         | i                               | a                           |
| DWZZ            | NJU P06001               | Eutriconodonta     | <i>Yanoconodon allini</i> (73)         | 122.2–124.6 (70–72)         | Yixian      | Daluozigou, Fengning, Hebei | Jehol   | 9–28          | i                               | sq                          |
| DWZZ            | CAGS 00-IG03             | Eutheria           | <i>Sinodelphys szalayi</i> (74)        | 122.2–124.6 (70–72)         | Yixian      | Dawangzhangzi, Lingyuan     | Jehol   | 29            | i                               | sc                          |
| DWZZ            | IVPP V12517              | Multituberculata   | <i>Sinobaatar lingyuanensis</i> (75)   | 122.2–124.6 (70–72)         | Yixian      | Dawangzhangzi, Lingyuan     | Jehol   | 61            | o                               | a                           |
| DWZZ            | NIGPAS139381             | Symmetrodonta      | <i>Akidolestes cifellii</i> (76)       | 122.2–124.6 (70–72)         | Yixian      | Dawangzhangzi, Lingyuan     | Jehol   | 3–9           | i                               | sf                          |
| DWZZ            | JZT 005-2010             | Eutriconodonta     | <i>Chaoyangodens lii</i> (77)          | 122.2–124.6 (70–72)         | Yixian      | Dawangzhangzi, Lingyuan     | Jehol   | 18–53         | i                               | t                           |
| LJT-JSG         | IVPP V15004              | Eutheria           | <i>Acristatherium yanensis</i> (78)    | 123.2±1.0 (79)              | Yixian      | Lujiatun village, Beipiao   | Jehol   | 26            | i                               | sc                          |
| LJT-JSG         | IVPP V12585              | Eutriconodonta     | <i>Gobiconodon zofiae</i> (80)         | 123.2±1.0 (79)              | Yixian      | Lujiatun village, Beipiao   | Jehol   | 152           | c                               | t                           |
| LJT-JSG         | DMHN 2607                | Eutriconodonta     | <i>Juchilestes liaoningensis</i> (81)  | 123.2±1.0 (79)              | Yixian      | Lujiatun village, Beipiao   | Jehol   | 101           | c                               | sc                          |
| LJT-JSG         | IVPP V13102              | Eutriconodonta     | <i>Meemannodon lujiatunensis</i> (82)  | 123.2±1.0 (79)              | Yixian      | Lujiatun village, Beipiao   | Jehol   | 1959          | c                               | t                           |
| LJT-JSG         | IVPP V12549              | Eutriconodonta     | <i>Repenomamus giganticus</i> (83)     | 123.2±1.0 (79)              | Yixian      | Lujiatun village, Beipiao   | Jehol   | 2528–6514     | c                               | t                           |
| LJT-JSG         | IVPP V14155              | Eutriconodonta     | <i>Repenomamus robustus</i> (84)       | 123.2±1.0 (79)              | Yixian      | Lujiatun village, Beipiao   | Jehol   | 1336–2638     | c                               | sf                          |
| LJT-JSG         | GMV 2139                 | Eutriconodonta     | <i>Jeholodens jenkinsi</i> (85)        | 125±0.18–124.6±0.3 (71, 72) | Yixian      | Sihetun, Chaoyang           | Jehol   | 3–15          | i                               | a                           |
| LJT-JSG         | HGM 41H-III-0321         | Symmetrodonta      | <i>Maotherium asiaticus</i> (86)       | 123.2±1.0 (79)              | Yixian      | Lujiatun village, Beipiao   | Jehol   | 72–135        | i                               | t                           |

|         |                   |               |                                                    |                  |        |                           |       |           |    |         |
|---------|-------------------|---------------|----------------------------------------------------|------------------|--------|---------------------------|-------|-----------|----|---------|
| LJT-JSG | NGMC 97-4-15      | Symmetrodonta | <i>Maothierium sinensis</i> (87)                   | 123.2±1.0 (79)   | Yixian | Lujiatun village, Beipiao | Jehol | 62–114    | i  | t       |
| LJT-JSG | IVPP V7466        | Symmetrodonta | <i>Zhangheotherium quinquecuspidens</i> (88)       | 124.6±0.1 (71)   | Yixian | Jiangshangou valley       | Jehol | 56–248    | i  | sc      |
| MSL     | HLMD ME 8035      | Metatheria    | <i>"Peradectes"</i> sp. (89, 90, 91, 92)           | 48.25–47.61 (93) | Messel | Messel Pit fossil site    |       | 12–50     | o* | a       |
| MSL     | SMNK PAL 464      | Pantolestia   | <i>Buxolestes piscator</i> (94, 95)                | 48.25–47.61 (93) | Messel | Messel Pit fossil site    |       | 563–1589  | o* | sq (sf) |
| MSL     | IRScNB I.G. 26533 | "Creodonta"   | <i>Lesmesodon edingeri</i> (91, 94, 96)            | 48.25–47.61 (93) | Messel | Messel Pit fossil site    |       | 300–570   | c  | t       |
| MSL     | HLMD ME 15566     | "Creodonta"   | <i>Lesmesodon behnkeae</i> (91, 94, 96)            | 48.25–47.61 (93) | Messel | Messel Pit fossil site    |       | 3000–4000 | o  | t       |
| MSL     | SMF MEA 263       | Pholidota     | <i>Eomanis waldi</i> (91, 94, 95, 97)              | 48.25–47.61 (93) | Messel | Messel Pit fossil site    |       | 520–1696  | o  | f       |
| MSL     | SMF MEA 261       | Pholidota     | <i>Eurotamandua joresi</i> (94, 95)                | 48.25–47.61 (93) | Messel | Messel Pit fossil site    |       | 237–3693  | i  | f       |
| MSL     | HLMD Me 1288      | Eulipotyphla  | <i>Macrocranium tenerum</i> (91, 98, 99)           | 48.25–47.61 (93) | Messel | Messel Pit fossil site    |       | 15–121    | i  | sa      |
| MSL     | SMF ME 2691a      | Eulipotyphla  | <i>Macrocranium tupaiodon</i> (91, 95, 99, 100)    | 48.25–47.61 (93) | Messel | Messel Pit fossil site    |       | 114–611   | o  | t       |
| MSL     | HLMD ME 8011      | Leptictida    | <i>Leptictidium tobieni</i> (91, 101, 102, 103)    | 48.25–47.61 (93) | Messel | Messel Pit fossil site    |       | 500–1000  | i  | sa      |
| MSL     | SMF ME 1143       | Leptictida    | <i>Leptictidium nasutum</i> (91, 101, 102, 103)    | 48.25–47.61 (93) | Messel | Messel Pit fossil site    |       | 500–1000  | c  | sa      |
| MSL     | SMF ME 11377      | Leptictida    | <i>Leptictidium auderiense</i> (91, 102, 103, 104) | 48.25–47.61 (93) | Messel | Messel Pit fossil site    |       | 466–627   | i  | sa      |
| MSL     | HLMD ME 7577      | Eulipotyphla  | <i>Pholidocercus hassiacus</i> (99, 105, 106)      | 48.25–47.61 (93) | Messel | Messel Pit fossil site    |       | 285       | i  | sf      |
| MSL     | HLMD ME 8850      | Apatotheria   | <i>Heterohyus nanus</i> (91, 94, 95)               | 48.25–47.61 (93) | Messel | Messel Pit fossil site    |       | 27–165    | i  | a       |
| MSL     | SMF ME 1228       | Primates      | <i>Europolemur koenigswaldi</i> (91, 94, 101)      | 48.25–47.61 (93) | Messel | Messel Pit fossil site    |       | 500       | o  | a       |
| MSL     | SMF ME 3379       | Primates      | <i>Europolemur kelleri</i> (89, 94, 101)           | 48.25–47.61 (93) | Messel | Messel Pit fossil site    |       | 2200      | c  | a       |
| MSL     | PMO 214.214       | Primates      | <i>Darwinius masillae</i> (101, 107)               | 48.25–47.61 (93) | Messel | Messel Pit fossil site    |       | 650–900   | h* | a       |
| MSL     | GMH L-2           | Primates      | <i>Godinotia neglecta</i> (91, 94, 108)            | 48.25–47.61 (93) | Messel | Messel Pit fossil site    |       | 957–2009  | o  | a       |
| MSL     | SMF ME 4554       | Rodentia      | <i>Masillamys beegeri</i> (91, 94, 105)            | 48.25–47.61 (93) | Messel | Messel Pit fossil site    |       | 31–254    | o* | t       |
| MSL     | WDC C-MG202       | Rodentia      | <i>Eoglibiravus wildi</i> (91, 109)                | 48.25–47.61 (93) | Messel | Messel Pit fossil site    |       | 8–36      | h* | a       |
| MSL     | SMF ME 510        | Artiodactyla  | <i>Messelobunodon schaeferi</i> (91, 95)           | 48.25–47.61 (93) | Messel | Messel Pit fossil site    |       | 1446–2061 | h* | t       |
| MSL     | SMF ME 1527a      | Artiodactyla  | <i>Aumelasia cf. A. gabineaudi</i> (91, 95)        | 48.25–47.61 (93) | Messel | Messel Pit fossil site    |       | 1036–2074 | h* | t       |

a. Extinct small-bodied mammaliaform community (CM): DWZZ, Dawangzhangzi community; JLS, Jiulongshan community; LJT-JSG, Lujiatun-Jianshangou community; MSL, Messel community; TJS, Tiaojishan community.

b. Institutional abbreviations: BMNH, Beijing Museum of Natural History, Beijing (China); CAG, Chinese Academy of Geology, Beijing (China); DMNH, Dalian Museum of Natural History, Dalian (China); GMH, Geiseltalmuseum der Martin Luther-Universität, Halle (Germany); GMV, National Geological Museum of China, Beijing (China); HG, Paleontological Center, Bohai University, Bohai (China); HGM, Henan Geological Museum, Zhengzhou (China); HLMD Me, Hessisches Landmuseum, Darmstadt (Germany); IRScNB, Institut Royal des Sciences naturelles de Belgique, Bruxelles (Belgium); IVPP, Institute of Vertebrate Paleontology and Paleoanthropology, Academy of Science, Beijing (China); JZMP, Jinzhou Museum of Paleontology, Jinzhou (China); JZT, Jizantang Paleontological Museum (China); LND, Lande Museum of Natural History (China); NGMC, National Geological Museum of China, Beijing (China); NIGPAS, Nanjing Institute of Geology and Paleontology, Academy of Science, Nanjing (China); NJU, Nanjing University, Nanjing (China); PMO, Geological Museum, Natural History Museum, University of Oslo

(Norway); PMOL, Paleontological Museum of Liaoning, Shenyang (China); SMF Me, Messel collection of the Forschungsinstitut Senckenberg, Frankfurt (Germany); SMNK, Staatliches Museum für Naturkunde Karlsruhe (Germany); STM, Tianyu Museum of Nature, Pingyi (China); WDC, Wyoming Dinosaur Center, Wyoming (USA).

c. Species name with numbered reference in parentheses.

d. Age (Ma) based on radioisotopic dates: 55, 60, 65, 70–72, 89, 93.

e. Dietary preference: c, carnivory; fr, frugivory; gr, granivory; h, herbivory; i, insectivory; o, omnivory;

\* denotes omnivorous or herbivorous diet that includes fruit and/or seeds based on either tooth morphology and/or gut contents (90, 110).

f. Locomotor mode: a, arboreal; f, fossorial; g, gliding; sa, saltatorial; sc, scansorial; sf, semifossorial; sq, semiaquatic; t, terrestrial.

**Table S2.** Description and ranking schema of the ecological parameters used in the ecological structure analyses.

| Body size          | Description                                                                                                                  | Log <sub>2</sub> -transformed             |          | Abbreviation | Rank |
|--------------------|------------------------------------------------------------------------------------------------------------------------------|-------------------------------------------|----------|--------------|------|
| < 32 g             | (very small)                                                                                                                 | < 5                                       |          | 1            | BS1  |
| 32–128 g           | (small)                                                                                                                      | 5–7                                       |          | 2            | BS2  |
| 128–512 g          | (medium)                                                                                                                     | 7–9                                       |          | 3            | BS3  |
| 512–2048 g         | (large)                                                                                                                      | 9–11                                      |          | 4            | BS4  |
| > 2048 g           | (very large)                                                                                                                 | > 11                                      |          | 5            | BS5  |
|                    |                                                                                                                              | OPC                                       |          |              | Rank |
| Dietary preference | Descriptive definition                                                                                                       | Lower                                     | Upper    |              | Rank |
| Carnivory          | Consumes animals as their primary food source                                                                                | 91 ± 54                                   | 126 ± 62 | c            | DP1  |
| Insectivory        | Consumes insects as their primary food source                                                                                | 139 ± 39                                  | 174 ± 43 | i            | DP2  |
| Omnivory           | Consumes a considerable amount of both animal and plant materials                                                            | 170 ± 41                                  | 187 ± 36 | o            | DP3  |
| Granivory          | Consumes seeds as their primary food source                                                                                  | 180 ± 31                                  | 205 ± 27 | gr           | DP4  |
| Frugivory          | Consumes fruits as their primary food source                                                                                 | 189 ± 56                                  | 208 ± 48 | fr           | DP5  |
| Herbivory          | Consumes diverse plant materials (seeds, fruits, leaves, roots, etc.)                                                        | 219 ± 43                                  | 255 ± 49 | h            | DP6  |
|                    |                                                                                                                              | Locomotor disparity (relative to Gliding) |          |              | Rank |
| Gliding            | Bridges gaps between trees by gliding usually with a patagium                                                                | 0.00                                      |          | g            | LM1  |
| Arboreal           | Spends most of the time in trees foraging, traveling, resting, but occasionally travels on the ground                        | 3.55                                      |          | a            | LM2  |
| Scansorial         | Capable of climbing for escape, eating, or leisure; spends a considerable amount of time both in the trees and on the ground | 5.02                                      |          | sc           | LM3  |
| Terrestrial        | Spends most of the time on the ground, but able to swim, climb, and burrow occasionally, but not specialized for those modes | 5.16                                      |          | t            | LM4  |
| Semiaquatic        | Capable of swimming for dispersal, escape, or foraging but also active on the ground                                         | 6.32                                      |          | sq           | LM5  |
| Semifossorial      | Regularly digs for food or to build burrows for shelter, but does not exclusively live underground                           | 6.58                                      |          | sf           | LM6  |
| Fossorial          | Efficiently digs burrows for shelter or foraging underground exclusively                                                     | 8.59                                      |          | f            | LM7  |
| Saltatorial        | Capable of jumping using both hind limbs simultaneously for high-speed transportation over long distances                    | 9.34                                      |          | sa           | LM8  |



**Table S3.** The evaluation of the body size estimation of Mesozoic mammaliaform species using seven different formulae from skull length, dentary length, humerus length and femur length.

| CM      | Specimen No      | Higher-level taxon | Species                            | Measurements (mm) |       |      |      | BM estimation (g) |         |        |        |        |        |        | Range (g)  | Midrange (g) | Rank | <i>SI Appendix</i> |      |
|---------|------------------|--------------------|------------------------------------|-------------------|-------|------|------|-------------------|---------|--------|--------|--------|--------|--------|------------|--------------|------|--------------------|------|
|         |                  |                    |                                    | SL                | DL    | HL   | FL   | F1                | F2      | F3     | F4     | F5     | F6     | F7     |            |              |      | BM (g)             | Rank |
| TJS     | STM33-9          | Haramiyida         | <i>Arboroharamiya jenkinsi</i>     | -                 | 35.0  | -    | 44.8 | -                 | -       | 131.2  | 360.9  | 502.2  | 0.0    | 399.3  | 45–502     | 274          | 3    | 354                | 3    |
| TJS     | LDN HMF2001      | Haramiyida         | <i>Shenshou lui</i>                | 46.3              | 35.5  | 26.1 | 42.7 | 257.6             | 199.2   | 136.8  | 320.4  | 437.9  | 160.4  | 345.4  | 27–438     | 233          | 3    | 300                | 3    |
| TJS     | BMNHC-PM003253   | Haramiyida         | <i>Xianshou songae</i>             | 26.0              | -     | 18.0 | 19.9 | 35.2              | 23.8    | -      | 49.3   | 50.8   | 55.4   | 35.2   | 20–55      | 38           | 2    | 40                 | 2    |
| TJS     | IVPP V16707      | Haramiyida         | <i>Xianshou linglong</i>           | 32.0              | 27.2  | -    | 25.6 | 72.1              | 51.2    | 61.9   | 91.5   | 103.5  | -      | 74.9   | 51–104     | 78           | 2    | 83                 | 2    |
| TJS     | BMNH 2940        | Haramiyida         | <i>Maiopatagium furculiferum</i>   | 33.0              | -     | 26.5 | 30.0 | 80.1              | 57.3    | -      | 134.9  | 161.8  | 168.5  | 120.2  | 120–169    | 145          | 3    | 120–178            | 3    |
| TJS     | BMNH 1142        | Multituberculata   | <i>Rugosodon eurasiaticus</i>      | 36.0              | 28.0  | 21.1 | 29.9 | 108.2             | 78.9    | 67.9   | 133.7  | 160.1  | 87.8   | 118.9  | 67–160     | 114          | 2    | 65–80              | 2    |
| TJS     | BMNH PM1143      | Eutheria           | <i>Juramaia sinensis</i>           | 22.0              | 17.0  | -    | -    | 19.8              | 12.9    | 15.4   | -      | -      | -      | -      | 13–20      | 17           | 1    | 13–15              | 1    |
| TJS     | BMNH 2942        | Haramiyida         | <i>Vilevolodon diplomylos</i>      | 24.0              | 16.0  | 17.2 | 21.5 | 26.7              | 17.7    | 12.9   | 59.6   | 63.1   | 48.9   | 44.4   | 13–63      | 38           | 2    | 35–55              | 2    |
| TJS     | HG-M018          | Haramiyida         | <i>Arboroharamiya allinhopsoni</i> | 30.8              | 17.3  | 17.9 | 21.0 | 63.2              | 44.4    | 16.3   | 56.2   | 59.1   | 54.4   | 41.3   | 16–64      | 40           | 2    | 17–87              | 2    |
| TJS     | BMNH 131735      | Docodonta          | <i>Docofossor brachydactylus</i>   | 22.0              | 17.0  | -    | 12.5 | 19.8              | 12.9    | 15.4   | 15.7   | 13.6   | -      | 8.8    | 9–20       | 15           | 1    | 9–17               | 1    |
| JLS     | BMNH 001138      | Docodonta          | <i>Agilodocodon scansorius</i>     | 30.0              | 23.0  | 14.0 | 13.5 | 57.7              | 40.3    | 37.9   | 19.0   | 17.0   | 27.1   | 11.0   | 11–58      | 35           | 2    | 27–40              | 2    |
| JLS     | PMOL AM00007A    | Haramiyida         | <i>Megaconus mammaliaformis</i>    | -                 | 35.5  | 30.0 | 39.0 | -                 | -       | 137.3  | 256.8  | 339.4  | 240.3  | 263.7  | 138–340    | 239          | 3    | 120–280            | 3    |
| JLS     | JZMP 04-117      | Docodonta          | <i>Castorocauda lutrasimilis</i>   | 65.0              | 55.0  | -    | -    | 829.7             | 694.3   | 503.4  | -      | -      | -      | -      | 503–830    | 667          | 4    | 500–800            | 4    |
| JLS     | IVPP V14739      | Eutriconodonta     | <i>Volaticotherium antiquum</i>    | -                 | 28.3  | 26.5 | 30.7 | -                 | -       | 70.1   | 142.8  | 172.6  | 168.5  | 128.8  | 70–173     | 122          | 2    | 70                 | 2    |
| JLS     | CAG S040811      | Yinothoria         | <i>Pseudotribos robustus</i>       | -                 | 17.0  | 7.1  | 8.5  | -                 | -       | 15.3   | 6.2    | 4.6    | 3.9    | 2.8    | 3–16       | 10           | 1    | 19                 | 1    |
| DWZZ    | CAG S01-IG1      | Eutheria           | <i>Eomaia scansoria</i>            | 27.5              | 22.7  | 13.6 | 16.1 | 42.7              | 29.3    | 36.2   | 29.3   | 27.9   | 25.1   | 18.7   | 18–43      | 30           | 1    | 11–49              | 1    |
| DWZZ    | NJU P06001       | Eutriconodonta     | <i>Yanoconodon allini</i>          | -                 | 20.7  | 12.5 | 14.1 | -                 | -       | 27.8   | 21.1   | 19.2   | 19.7   | 12.5   | 13–28      | 21           | 1    | 9–29               | 1    |
| DWZZ    | CAGS00-IG03      | Eutheria           | <i>Sinodelphys szalayi</i>         | -                 | 20.9  | 10.2 | 13.6 | -                 | -       | 28.6   | 19.4   | 17.3   | 11.0   | 11.3   | 11–20      | 16           | 1    | 29                 | 1    |
| DWZZ    | IVPP V12517      | Multituberculata   | <i>Sinobaatar lingyuanensis</i>    | 32.3              | 21.8  | 12.6 | 18.1 | 74.3              | 52.8    | 32.1   | 38.8   | 38.5   | 20.1   | 26.3   | 20–75      | 48           | 2    | 61                 | 2    |
| DWZZ    | NIGPAS139381     | Symmetrodonta      | <i>Akidolestes cifellii</i>        | -                 | -     | 9.1  | 9.8  | -                 | -       | -      | 8.7    | 6.9    | 7.9    | 4.2    | 4–9        | 7            | 1    | 3–9                | 1    |
| DWZZ    | JZT005-2010      | Eutriconodonta     | <i>Chaoyangodens lii</i>           | 31.3              | -     | 15.9 | 17.7 | 66.9              | 47.2    | -      | 37.1   | 36.6   | 39.0   | 24.9   | 25–67      | 46           | 2    | 18–53              | 2    |
| LJT-JSG | IVPP V15004      | Eutheria           | <i>Acristatherium yanensis</i>     | 24.3              | 19.7  | -    | -    | 28.1              | 18.7    | 24.0   | -      | -      | -      | -      | 18–28      | 23           | 1    | 26                 | 1    |
| LJT-JSG | IVPP V12585      | Eutriconodonta     | <i>Gobiconodon zofiae</i>          | 43.2              | 36.7  | -    | -    | 202.7             | 154.2   | 151.8  | -      | -      | -      | -      | 152–203    | 178          | 3    | 152                | 3    |
| LJT-JSG | DMHN 2607        | Eutriconodonta     | <i>Juchilestes liaoningensis</i>   | -                 | 32.0  | -    | -    | -                 | -       | 101.0  | -      | -      | -      | -      | 101        | 101          | 2    | 101                | 2    |
| LJT-JSG | IVPP V13102      | Eutriconodonta     | <i>Meemannodon lujiatunensis</i>   | -                 | 86.9  | -    | -    | -                 | -       | 1958.4 | -      | -      | -      | -      | 1959       | 1959         | 4    | 1959               | 4    |
| LJT-JSG | IVPP V12549      | Eutriconodonta     | <i>Repenomamus giganticus</i>      | 160               | 127.8 | 83.0 | 95.0 | 18527.0           | 19105.6 | 6145.8 | 2282.9 | 4198.3 | 4425.4 | 3787.3 | 2282–19106 | 10694        | 5    | 2528–6514          | 5    |
| LJT-JSG | IVPP V 14155     | Eutriconodonta     | <i>Repenomamus robustus</i>        | -                 | 80.8  | 67.1 | 69.3 | -                 | -       | 1578.1 | 1051.9 | 1720.7 | 2404.2 | 1472.0 | 1052–2405  | 1729         | 4    | 1336–2638          | 4    |
| LJT-JSG | GMV 2139         | Eutriconodonta     | <i>Jeholodens jenkinsi</i>         | -                 | 15.3  | 8.8  | 11.5 | -                 | -       | 11.3   | 12.7   | 10.7   | 7.2    | 6.8    | 7–13       | 10           | 1    | 3–15               | 1    |
| LJT-JSG | HGM 41H-III-0321 | Symmetrodonta      | <i>Maotherium asiaticus</i>        | 36.5              | 28.5  | 18.5 | 24.5 | 113.4             | 83.0    | 71.5   | 82.1   | 91.3   | 60.2   | 65.6   | 60–114     | 87           | 2    | 72–135             | 2    |

|         |              |               |                                         |   |      |      |      |   |   |      |       |       |       |       |         |     |   |        |   |
|---------|--------------|---------------|-----------------------------------------|---|------|------|------|---|---|------|-------|-------|-------|-------|---------|-----|---|--------|---|
| LJT-JSG | NGMC-97-4-15 | Symmetrodonta | <i>Maothierium sinensis</i>             | - | 27.1 | -    | 23.1 | - | - | 61.6 | 71.0  | 77.3  | -     | 55.0  | 55-78   | 67  | 2 | 62-114 | 2 |
| LJT-JSG | IVPP V7466   | Symmetrodonta | <i>Zhangheotherium quinquecuspidens</i> | - | 31.9 | 23.2 | 30.3 | - | - | 99.6 | 138.5 | 166.7 | 114.9 | 124.1 | 100-167 | 134 | 3 | 56-248 | 3 |

**Abbreviations:** CM, Mesozoic community; BM, body mass; FL, femur length; HL, humerus length; DL, dentary length; SL, skull length.

**Body mass estimation formulae:** F1,  $BM = 3.488 \times \log SL - 3.332$  (128); F2,  $\log BM = 3.68 \times \log SL - 3.83$  (129); F3,  $\ln BM = 2.9677 \times \ln ML - 5.6712$  (28); F4,  $BM = 0.032 \times FL2.454$  (130); F5,  $\log BM = 2.825 \times \log FL - 1.964$  (128); F6,  $\log BM = 2.8626 \times \log HL - 1.8476$  (29); F7,  $\log BM = 2.993 \times \log FL - 2.341$  (29).

**Table S4.** Dietary inference based on gross dental morphology of fossil species

| Gross dental morphology               | Function                                     | Dietary inference                           |
|---------------------------------------|----------------------------------------------|---------------------------------------------|
| cusps-in-line/three-cusps-in-triangle | cutting/shearing                             | carnivory/insectivory                       |
| tribosphenic/pseudo-tribosphenic      | shearing and crushing, and possibly grinding | insectivory possibly omnivory and herbivory |
| multiple-cusp-rows                    | crushing and grinding                        | omnivory/herbivory                          |

**Table S5.** Percentages of ecological parameters for the 98 extant, small-bodied mammalian communities arranged by environmental classification.

| Environmental category   | Body size <sup>a</sup> |      |      |      |      | Dietary preference <sup>b</sup> |      |      |      |      |      | Locomotor preference <sup>c</sup> |      |      |      |     |      |     |      |
|--------------------------|------------------------|------|------|------|------|---------------------------------|------|------|------|------|------|-----------------------------------|------|------|------|-----|------|-----|------|
|                          | 1                      | 2    | 3    | 4    | 5    | c                               | i    | o    | gr   | fr   | h    | g                                 | a    | sc   | t    | sq  | sf   | f   | s    |
| Closed                   | 33.1                   | 27.1 | 22.4 | 9.2  | 8.2  | 9.6                             | 19.8 | 41.2 | 5.9  | 5.9  | 17.6 | 1.4                               | 11.4 | 27.3 | 50.4 | 2.2 | 4.5  | 1.4 | 1.6  |
| Open                     | 38.2                   | 45.1 | 9.4  | 4.5  | 2.8  | 6.3                             | 17.4 | 29.5 | 23.6 | 0.0  | 23.3 | 0.3                               | 1.7  | 15.3 | 51.7 | 1.7 | 18.1 | 2.1 | 9.0  |
| Tropical                 | 16.4                   | 30.7 | 31.4 | 11.8 | 9.8  | 5.9                             | 20.9 | 46.3 | 6.6  | 10.1 | 10.1 | 0.7                               | 19.2 | 25.1 | 50.5 | 1.4 | 2.1  | 0.7 | 0.3  |
| Arid                     | 42.9                   | 45.2 | 7.9  | 0.8  | 3.2  | 7.9                             | 19.8 | 31.7 | 27.0 | 0.0  | 13.5 | 0                                 | 2.4  | 19.0 | 50.0 | 0.0 | 15.1 | 4.0 | 9.5  |
| Temperate                | 53.3                   | 28.0 | 8.8  | 4.9  | 4.9  | 16.5                            | 18.7 | 37.9 | 7.1  | 0.5  | 19.2 | 0.5                               | 2.7  | 28.0 | 54.9 | 2.7 | 7.7  | 2.2 | 1.1  |
| Cold                     | 39.9                   | 35.5 | 12.3 | 7.9  | 4.4  | 4.9                             | 15.8 | 26.1 | 15.8 | 0.0  | 37.4 | 2.5                               | 0.0  | 17.7 | 48.3 | 3.4 | 17.7 | 1.0 | 9.4  |
| Tropical rainforest      | 13.0                   | 28.0 | 40.4 | 10.6 | 8.1  | 4.3                             | 24.8 | 43.5 | 6.2  | 11.8 | 9.3  | 0.6                               | 23.0 | 27.3 | 48.4 | 0.6 | 0.0  | 0.0 | 0.0  |
| Tropical seasonal forest | 19.4                   | 30.6 | 23.1 | 12.0 | 14.8 | 8.3                             | 19.4 | 47.2 | 2.8  | 10.2 | 12.0 | 0.9                               | 18.5 | 29.6 | 38.9 | 2.8 | 6.5  | 1.9 | 0.9  |
| Savanna                  | 27.3                   | 54.5 | 6.1  | 6.1  | 6.1  | 6.1                             | 12.1 | 48.5 | 21.2 | 0.0  | 12.1 | 0.0                               | 3.0  | 0.0  | 81.8 | 0.0 | 9.1  | 3.0 | 3.0  |
| Grassland                | 40.3                   | 43.4 | 10.9 | 3.9  | 1.6  | 7.8                             | 18.6 | 29.5 | 19.4 | 0.0  | 24.8 | 0.8                               | 0.8  | 13.2 | 49.6 | 2.3 | 23.3 | 0.8 | 9.3  |
| Shrubland                | 41.1                   | 38.9 | 8.9  | 6.7  | 4.4  | 6.7                             | 17.8 | 26.7 | 22.2 | 0.0  | 26.7 | 0.0                               | 3.3  | 21.1 | 51.1 | 2.2 | 13.3 | 2.2 | 6.7  |
| Desert                   | 33.3                   | 58.3 | 8.3  | 0.0  | 0.0  | 0.0                             | 16.7 | 19.4 | 44.4 | 0.0  | 19.4 | 0.0                               | 0.0  | 22.2 | 33.3 | 0.0 | 19.4 | 5.6 | 19.4 |
| Temperate forest         | 54.9                   | 21.7 | 9.7  | 8.0  | 5.7  | 17.1                            | 17.7 | 37.7 | 6.3  | 0.0  | 21.1 | 1.7                               | 0.6  | 28.0 | 57.1 | 2.9 | 4.6  | 2.9 | 2.3  |
| Boreal forest            | 47.0                   | 33.3 | 10.6 | 4.5  | 4.5  | 4.5                             | 13.6 | 34.8 | 9.1  | 0.0  | 37.9 | 3.0                               | 0.0  | 21.2 | 56.1 | 3.0 | 12.1 | 0.0 | 4.5  |

<sup>a</sup>**Abbreviations:** 1, < 32 g; 2, 32–128 g; 3, 128–512 g; 4, 512–2048 g; 5, > 2048 g

<sup>b</sup>**Abbreviations:** c, carnivory; fr, frugivory; gr, granivory; h, herbivory; i, insectivory; o, omnivory.

<sup>c</sup>**Abbreviations:** a, arboreal; f, fossorial; g, gliding; sa, saltatorial; sc, scansorial; sf, semifossorial; sq, semiaquatic; t, terrestrial.

**Table S6.** Descriptive statistics of ecological disparity (EDisp) and ecological diversity (ERich) of 98 extant, small-bodied mammalian communities arranged by environmental classification and of five extinct mammaliaform paleocommunities.

| Environmental category |                          | MAT (°C)     | MAP (mm/year) | NPP <sup>a</sup> (g C m <sup>-2</sup> yr <sup>-1</sup> ) | Mean No. of species | EDisp     |           | ERich     |           |
|------------------------|--------------------------|--------------|---------------|----------------------------------------------------------|---------------------|-----------|-----------|-----------|-----------|
|                        |                          |              |               |                                                          |                     | $\bar{x}$ | <i>sd</i> | $\bar{x}$ | <i>sd</i> |
| Habitat openness       | Closed                   | variable     | variable      | high                                                     | 11                  | 3.82      | 2.14      | 8.40      | 4.77      |
|                        | Open                     | variable     | variable      | low                                                      | 5                   | 3.97      | 2.32      | 4.75      | 2.07      |
| Climate type           | Tropical                 | high         | high          | high                                                     | 12                  | 3.49      | 1.96      | 8.63      | 5.33      |
|                        | Arid                     | high         | low           | low                                                      | 5                   | 3.75      | 2.34      | 4.31      | 1.87      |
|                        | Temperate                | variable     | variable      | intermediate                                             | 9                   | 4.12      | 2.29      | 7.10      | 4.24      |
|                        | Cold                     | low          | variable      | low                                                      | 7                   | 4.54      | 2.32      | 6.04      | 2.86      |
| Vegetation type        | Tropical rainforest      | high         | high          | high                                                     | 13                  | 3.20      | 1.82      | 9.33      | 5.23      |
|                        | Tropical seasonal forest | high         | intermediate  | high                                                     | 14                  | 4.07      | 2.07      | 10.13     | 5.94      |
|                        | Savanna                  | high         | intermediate  | intermediate                                             | 6                   | 2.54      | 1.54      | 4.50      | 2.07      |
|                        | Grassland                | intermediate | low           | low                                                      | 7                   | 4.22      | 2.39      | 5.65      | 2.43      |
|                        | Shrubland                | intermediate | low           | intermediate                                             | 5                   | 4.13      | 2.36      | 4.33      | 1.75      |
|                        | Desert                   | high         | low           | low                                                      | 4                   | 3.54      | 1.64      | 3.78      | 1.09      |
|                        | Temperate forest         | intermediate | intermediate  | high                                                     | 11                  | 4.27      | 2.34      | 8.19      | 4.65      |
|                        | Boreal forest            | low          | intermediate  | intermediate                                             | 7                   | 4.26      | 2.26      | 6.00      | 2.35      |
| Extinct Community      | Messel                   | 12–21*       | 834–1758*     | -                                                        | 21                  | 5.73      | 2.74      | 19.0      | -         |
|                        | Dawangzhangzi            | 12–14*       | 869–1025*     | -                                                        | 6                   | 2.87      | 1.36      | 6.0       | -         |
|                        | Lujiatun-Jianshangou     | 15–24*       | 1161–2031*    | -                                                        | 10                  | 3.27      | 1.76      | 9.0       | -         |
|                        | Tiaojishan               | 12–20*       | 881–1872*     | -                                                        | 10                  | 3.40      | 2.82      | 7.0       | -         |
|                        | Jiulongshan              | 11–17*       | 761–1433*     | -                                                        | 5                   | 4.40      | 1.65      | 5.0       | -         |

\*estimated values from Table S20.

**Abbreviations:** MAP, mean annual precipitation; MAT, mean annual temperature; NPP, net primary productivity; EDisp, ecological disparity; ERich, ecological richness. MAT scale: high, > 20 °C; intermediate, 5–20 °C; low, < 5 °C; MAP scale: high, > 2000 mm; intermediate, 400–2000 mm; low, < 400 mm; based on (6).

<sup>a</sup>NPP ranges based on dataset of (111) reported in (6) and criteria from (112).

**Table S7.** Pairwise *t*-tests of mean ecological disparity (EDisp) of different environmental categories among extant, small-bodied mammalian communities.

| Pairwise comparisons*                         |                        | <i>t</i>                                         | <i>df</i> | <i>p</i> -value |
|-----------------------------------------------|------------------------|--------------------------------------------------|-----------|-----------------|
| Habitat openness                              | Closed vs. Open        | -1.737                                           | 1218.179  | 0.083           |
| Climate type                                  | Tropical vs. Arid      | -1.911                                           | 387.321   | 0.057           |
|                                               | Tropical vs. Temperate | -7.650                                           | 1713.452  | 0.000           |
|                                               | Tropical vs. Cold      | -11.717                                          | 1297.622  | 0.000           |
|                                               | Arid vs. Temperate     | -2.459                                           | 532.530   | 0.014           |
|                                               | Arid vs. Cold          | -5.147                                           | 582.345   | 0.000           |
|                                               | Temperate vs. Cold     | -3.933                                           | 1802.372  | 0.000           |
|                                               | Vegetation type        | Tropical rainforest vs. Tropical seasonal forest | -10.631   | 1919.141        |
| Tropical rainforest vs. Savanna               |                        | 3.951                                            | 110.829   | 0.000           |
| Tropical rainforest vs. Grassland             |                        | -8.426                                           | 647.682   | 0.000           |
| Tropical rainforest vs. Shrubland             |                        | -5.897                                           | 295.782   | 0.000           |
| Tropical rainforest vs. Desert                |                        | -1.564                                           | 64.043    | 0.123           |
| Tropical rainforest vs. Temperate forest      |                        | -12.652                                          | 2087.330  | 0.000           |
| Tropical rainforest vs. Boreal forest         |                        | -6.938                                           | 299.349   | 0.000           |
| Tropical seasonal forest vs. Savanna          |                        | 8.866                                            | 127.637   | 0.000           |
| Tropical seasonal forest vs. Grassland        |                        | -1.140                                           | 804.269   | 0.254           |
| Tropical seasonal forest vs. Shrubland        |                        | -0.389                                           | 343.579   | 0.697           |
| Tropical seasonal forest vs. Desert           |                        | 2.358                                            | 69.605    | 0.021           |
| Tropical seasonal forest vs. Temperate forest |                        | -2.101                                           | 2106.185  | 0.036           |
| Tropical seasonal forest vs. Boreal forest    |                        | -1.179                                           | 351.482   | 0.239           |
| Savanna vs. Grassland                         |                        | -8.640                                           | 195.793   | 0.000           |
| Savanna vs. Shrubland                         |                        | -7.256                                           | 256.746   | 0.000           |
| Savanna vs. Desert                            |                        | -3.750                                           | 117.487   | 0.000           |
| Savanna vs. Temperate forest                  |                        | -9.958                                           | 131.784   | 0.000           |
| Savanna vs. Boreal forest                     |                        | -7.975                                           | 246.153   | 0.000           |
| Grassland vs. Shrubland                       |                        | 0.443                                            | 500.679   | 0.658           |
| Grassland vs. Desert                          |                        | 2.803                                            | 92.443    | 0.006           |
| Grassland vs. Temperate forest                |                        | -0.419                                           | 848.194   | 0.675           |
| Grassland vs. Boreal forest                   |                        | -0.222                                           | 517.764   | 0.824           |
| Shrubland vs. Desert                          |                        | 2.261                                            | 122.996   | 0.025           |
| Shrubland vs. Temperate forest                | -0.829                 | 355.628                                          | 0.408     |                 |
| Shrubland vs. Boreal forest                   | -0.590                 | 486.199                                          | 0.555     |                 |
| Desert vs. Temperate forest                   | -3.245                 | 70.945                                           | 0.002     |                 |
| Desert vs. Boreal forest                      | -2.771                 | 117.399                                          | 0.007     |                 |
| Temperate vs. Boreal forest                   | 0.089                  | 364.700                                          | 0.929     |                 |

\*Grey rows indicate statistically significant results ( $p < 0.05$ ). **Abbreviations:** *df*, degrees of freedom; *t*, *t*-statistic.

**Table S8.** Pairwise *t*-tests of mean ecological richness (ERich) of different environmental categories among extant, small-bodied mammalian communities.

| Pairwise comparisons*          |                                                  | <i>t</i> | <i>df</i> | <i>p</i> -value |
|--------------------------------|--------------------------------------------------|----------|-----------|-----------------|
| Habitat openness               | Closed vs. Open                                  | 4.755    | 57.980    | 0.000           |
|                                | Tropical vs. Arid                                | 3.759    | 28.194    | 0.001           |
| Climate type                   | Tropical vs. Temperate                           | 1.056    | 41.928    | 0.297           |
|                                | Tropical vs. Cold                                | 2.131    | 33.992    | 0.040           |
|                                | Arid vs. Temperate                               | -2.746   | 24.695    | 0.011           |
|                                | Arid vs. Cold                                    | -2.645   | 46.868    | 0.011           |
|                                | Temperate vs. Cold                               | 0.975    | 31.047    | 0.337           |
| Vegetation type                | Tropical rainforest vs. Tropical seasonal forest | -0.306   | 13.764    | 0.764           |
|                                | Tropical rainforest vs. Savanna                  | 2.793    | 15.611    | 0.013           |
|                                | Tropical rainforest vs. Grassland                | 2.296    | 13.911    | 0.038           |
|                                | Tropical rainforest vs. Shrubland                | 3.196    | 12.657    | 0.007           |
|                                | Tropical rainforest vs. Desert                   | 3.578    | 12.262    | 0.004           |
|                                | Tropical rainforest vs. Temperate forest         | 0.601    | 22.198    | 0.554           |
|                                | Tropical rainforest vs. Boreal forest            | 1.961    | 16.101    | 0.067           |
|                                | Tropical seasonal forest vs. Savanna             | 2.485    | 9.123     | 0.034           |
|                                | Tropical seasonal forest vs. Grassland           | 2.063    | 7.959     | 0.073           |
|                                | Tropical seasonal forest vs. Shrubland           | 2.707    | 7.545     | 0.028           |
|                                | Tropical seasonal forest vs. Desert              | 2.979    | 7.422     | 0.019           |
|                                | Tropical seasonal forest vs. Temperate forest    | 0.807    | 11.449    | 0.436           |
|                                | Tropical seasonal forest vs. Boreal forest       | 1.841    | 8.925     | 0.099           |
|                                | Savanna vs. Grassland                            | -1.143   | 9.557     | 0.281           |
|                                | Savanna vs. Shrubland                            | 0.177    | 7.528     | 0.864           |
|                                | Savanna vs. Desert                               | 0.784    | 6.876     | 0.459           |
|                                | Savanna vs. Temperate forest                     | -2.564   | 19.054    | 0.019           |
|                                | Savanna vs. Boreal forest                        | -1.302   | 11.800    | 0.218           |
|                                | Grassland vs. Shrubland                          | 1.929    | 34.401    | 0.062           |
|                                | Grassland vs. Desert                             | 2.859    | 26.978    | 0.008           |
|                                | Grassland vs. Temperate forest                   | -1.977   | 21.479    | 0.061           |
|                                | Grassland vs. Boreal forest                      | -0.367   | 16.047    | 0.718           |
|                                | Shrubland vs. Desert                             | 1.010    | 23.484    | 0.323           |
| Shrubland vs. Temperate forest | -3.124                                           | 18.747   | 0.006     |                 |
| Shrubland vs. Boreal forest    | -1.886                                           | 12.609   | 0.083     |                 |
| Desert vs. Temperate forest    | -3.619                                           | 17.769   | 0.002     |                 |
| Desert vs. Boreal forest       | -2.577                                           | 11.318   | 0.025     |                 |
| Temperate vs. Boreal forest    | 1.561                                            | 22.866   | 0.132     |                 |

\*Grey rows indicate statistically significant results ( $p < 0.05$ ). **Abbreviations:** *df*, degrees of freedom; *t*, *t*-statistic.

**Table S9.** Estimated ecological disparity (EDisp) of extant, small-bodied mammalian communities when resampled at five, six, and ten species for comparison with extinct Mesozoic mammaliaform paleocommunities.

| Environmental category |                          | Five-species |      | Six-species |      | Ten-species |      |
|------------------------|--------------------------|--------------|------|-------------|------|-------------|------|
|                        |                          | Mean         | SD*  | Mean        | SD*  | Mean        | SD*  |
| Habitat openness       | Closed                   | 4.09         | 1.07 | 4.09        | 0.94 | 4.11        | 0.71 |
|                        | Open                     | 4.09         | 1.06 | 4.10        | 0.91 | 4.12        | 0.67 |
| Climate type           | Tropical                 | 3.68         | 0.99 | 3.68        | 0.92 | 3.68        | 0.67 |
|                        | Arid                     | 3.97         | 1.21 | 3.98        | 1.08 | 3.96        | 0.80 |
|                        | Temperate                | 3.88         | 1.08 | 3.83        | 1.00 | 3.84        | 0.72 |
|                        | Cold                     | 4.60         | 0.98 | 4.59        | 0.87 | 4.59        | 0.60 |
| Vegetation type        | Tropical rainforest      | 3.46         | 0.87 | 3.46        | 0.81 | 3.43        | 0.58 |
|                        | Tropical seasonal forest | 4.24         | 1.10 | 4.23        | 1.01 | 4.23        | 0.75 |
|                        | Savanna                  | 3.10         | 1.40 | 3.14        | 1.29 | 3.11        | 0.98 |
|                        | Grassland                | 4.24         | 0.97 | 4.25        | 0.86 | 4.23        | 0.62 |
|                        | Shrubland                | 4.25         | 1.07 | 4.25        | 0.94 | 4.30        | 0.69 |
|                        | Desert                   | 3.97         | 0.90 | 4.00        | 0.80 | 3.99        | 0.56 |
|                        | Temperate forest         | 4.02         | 1.14 | 4.04        | 1.02 | 4.04        | 0.74 |
|                        | Boreal forest            | 4.14         | 1.04 | 4.13        | 0.98 | 4.14        | 0.70 |

\*SD, standard deviation.

**Table S10.** Pairwise *t*-tests of mean ecological disparity (EDisp) of resampled, extant, small-bodied mammalian communities with five, six, and ten species for comparison with sampled extinct Mesozoic mammaliaform paleocommunities.

| Pairwise comparisons of resampled, extant, small-bodied mammalian communities* |                                                 | Five-species |           |                 | Six-species |           |                 | Ten-species |           |                 |
|--------------------------------------------------------------------------------|-------------------------------------------------|--------------|-----------|-----------------|-------------|-----------|-----------------|-------------|-----------|-----------------|
|                                                                                |                                                 | <i>t</i>     | <i>df</i> | <i>p</i> -value | <i>t</i>    | <i>df</i> | <i>p</i> -value | <i>t</i>    | <i>df</i> | <i>p</i> -value |
| Habitat openness                                                               | Closed vs Open                                  | 0.05         | 1997.99   | 0.963           | -0.39       | 1996.77   | 0.699           | -0.35       | 1991.84   | 0.724           |
| Climate type                                                                   | Tropical vs Arid                                | -5.77        | 1921.91   | 0.000           | -6.68       | 1950.12   | 0.000           | -8.50       | 1943.68   | 0.000           |
|                                                                                | Tropical vs Temperate                           | -4.21        | 1982.68   | 0.000           | -3.52       | 1986.20   | 0.000           | -5.31       | 1990.40   | 0.000           |
|                                                                                | Tropical vs Cold                                | -20.86       | 1997.99   | 0.000           | -22.79      | 1989.52   | 0.000           | -32.10      | 1974.85   | 0.000           |
|                                                                                | Arid vs Temperate                               | 1.76         | 1972.78   | 0.079           | 3.21        | 1985.11   | 0.001           | 3.40        | 1975.60   | 0.001           |
|                                                                                | Arid vs Cold                                    | -12.89       | 1920.37   | 0.000           | -13.95      | 1905.99   | 0.000           | -20.16      | 1861.73   | 0.000           |
|                                                                                | Temperate vs Cold                               | -15.71       | 1981.93   | 0.000           | -18.21      | 1958.70   | 0.000           | -25.42      | 1942.57   | 0.000           |
| Vegetation type                                                                | Tropical rainforest vs Tropical seasonal forest | -17.55       | 1898.85   | 0.000           | -18.79      | 1907.41   | 0.000           | -26.54      | 1879.33   | 0.000           |
|                                                                                | Tropical rainforest vs Savanna                  | 6.81         | 1667.20   | 0.000           | 6.79        | 1674.96   | 0.000           | 8.98        | 1631.33   | 0.000           |
|                                                                                | Tropical rainforest vs Grassland                | -18.91       | 1973.33   | 0.000           | -20.98      | 1989.30   | 0.000           | -29.50      | 1991.04   | 0.000           |
|                                                                                | Tropical rainforest vs Shrubland                | -18.03       | 1917.15   | 0.000           | -20.03      | 1952.66   | 0.000           | -30.39      | 1944.79   | 0.000           |
|                                                                                | Tropical rainforest vs Desert                   | -13.02       | 1996.06   | 0.000           | -14.98      | 1997.73   | 0.000           | -21.79      | 1995.44   | 0.000           |
|                                                                                | Tropical rainforest vs Temperate forest         | -12.29       | 1864.71   | 0.000           | -13.90      | 1895.93   | 0.000           | -20.37      | 1898.82   | 0.000           |
|                                                                                | Tropical rainforest vs Boreal forest            | -15.77       | 1934.51   | 0.000           | -16.58      | 1930.74   | 0.000           | -24.45      | 1937.84   | 0.000           |
|                                                                                | Tropical seasonal forest vs Savanna             | 20.10        | 1887.88   | 0.000           | 21.11       | 1885.17   | 0.000           | 28.78       | 1877.85   | 0.000           |
|                                                                                | Tropical seasonal forest vs Grassland           | -0.06        | 1969.75   | 0.948           | -0.40       | 1951.71   | 0.686           | 0.22        | 1924.76   | 0.826           |
|                                                                                | Tropical seasonal forest vs Shrubland           | -0.19        | 1996.82   | 0.846           | -0.43       | 1988.86   | 0.671           | -2.09       | 1982.09   | 0.037           |
|                                                                                | Tropical seasonal forest vs Desert              | 5.86         | 1922.07   | 0.000           | 5.64        | 1898.39   | 0.000           | 8.12        | 1848.35   | 0.000           |
|                                                                                | Tropical seasonal forest vs Temperate forest    | 4.37         | 1994.58   | 0.000           | 4.28        | 1997.56   | 0.000           | 5.86        | 1996.84   | 0.000           |
|                                                                                | Tropical seasonal forest vs Boreal forest       | 2.07         | 1993.14   | 0.038           | 2.33        | 1995.88   | 0.020           | 3.00        | 1985.74   | 0.003           |
|                                                                                | Savanna vs Grassland                            | -21.02       | 1778.71   | 0.000           | -22.60      | 1741.04   | 0.000           | -30.53      | 1689.95   | 0.000           |
|                                                                                | Savanna vs Shrubland                            | -20.45       | 1867.59   | 0.000           | -22.00      | 1825.54   | 0.000           | -31.50      | 1796.45   | 0.000           |
|                                                                                | Savanna vs Desert                               | -16.51       | 1698.29   | 0.000           | -18.00      | 1663.31   | 0.000           | -24.73      | 1596.61   | 0.000           |
|                                                                                | Savanna vs Temperate forest                     | -15.95       | 1919.56   | 0.000           | -17.26      | 1897.09   | 0.000           | -23.99      | 1857.15   | 0.000           |
|                                                                                | Savanna vs Boreal forest                        | -18.67       | 1845.48   | 0.000           | -19.35      | 1857.46   | 0.000           | -27.03      | 1807.07   | 0.000           |
|                                                                                | Grassland vs Shrubland                          | -0.14        | 1979.84   | 0.889           | -0.04       | 1982.96   | 0.968           | -2.54       | 1975.24   | 0.011           |
|                                                                                | Grassland vs Desert                             | 6.35         | 1985.01   | 0.000           | 6.63        | 1985.98   | 0.000           | 8.88        | 1980.23   | 0.000           |
|                                                                                | Grassland vs Temperate forest                   | 4.67         | 1947.91   | 0.000           | 5.00        | 1942.86   | 0.000           | 6.19        | 1940.75   | 0.000           |
|                                                                                | Grassland vs Boreal forest                      | 2.27         | 1988.04   | 0.024           | 2.92        | 1968.70   | 0.004           | 3.08        | 1970.42   | 0.002           |
|                                                                                | Shrubland vs Desert                             | 6.16         | 1938.42   | 0.000           | 6.35        | 1945.80   | 0.000           | 10.99       | 1921.12   | 0.000           |
|                                                                                | Shrubland vs Temperate forest                   | 4.61         | 1989.44   | 0.000           | 4.85        | 1984.47   | 0.000           | 8.24        | 1989.43   | 0.000           |
|                                                                                | Shrubland vs Boreal forest                      | 2.30         | 1996.74   | 0.022           | 2.84        | 1995.52   | 0.005           | 5.33        | 1997.75   | 0.000           |
| Desert vs Temperate forest                                                     | -0.95                                           | 1890.74      | 0.343     | -0.85           | 1886.53     | 0.396     | -1.58           | 1869.46     | 0.114     |                 |
| Desert vs Boreal forest                                                        | -3.75                                           | 1953.55      | 0.000     | -3.16           | 1922.68     | 0.002     | -5.08           | 1913.08     | 0.000     |                 |
| Temperate forest vs Boreal forest                                              | -2.44                                           | 1981.74      | 0.015     | -2.04           | 1993.51     | 0.041     | -3.05           | 1992.07     | 0.002     |                 |

\*Grey rows indicate statistically significant results ( $p < 0.05$ ). **Abbreviations:** *df*, degrees of freedom; *t*, *t*-statistic.

**Table S11.** Estimated ecological disparity (EDisp) of 98 extant, small-bodied mammalian communities with alternative ranking schemes of locomotor modes.

| Environmental category |                          | Scheme (a) |      | Scheme (b) |      | Scheme (c) |      |
|------------------------|--------------------------|------------|------|------------|------|------------|------|
|                        |                          | Mean       | SD*  | Mean       | SD*  | Mean       | SD*  |
| Habitat openness       | Closed                   | 4.03       | 2.41 | 3.93       | 2.29 | 3.82       | 2.16 |
|                        | Open                     | 4.31       | 2.55 | 4.22       | 2.44 | 3.86       | 2.24 |
| Climate type           | Tropical                 | 3.65       | 2.16 | 3.56       | 2.04 | 3.51       | 1.98 |
|                        | Arid                     | 3.92       | 2.29 | 4.01       | 2.34 | 3.63       | 2.14 |
|                        | Temperate                | 4.58       | 2.76 | 4.39       | 2.62 | 4.16       | 2.35 |
|                        | Cold                     | 4.81       | 2.56 | 4.67       | 2.44 | 4.44       | 2.29 |
| Vegetation type        | Tropical rainforest      | 3.26       | 1.91 | 3.20       | 1.82 | 3.20       | 1.82 |
|                        | Tropical seasonal forest | 4.41       | 2.39 | 4.28       | 2.26 | 4.10       | 2.11 |
|                        | Savanna                  | 2.65       | 1.71 | 2.63       | 1.65 | 2.54       | 1.53 |
|                        | Grassland                | 4.63       | 2.52 | 4.55       | 2.48 | 4.09       | 2.30 |
|                        | Shrubland                | 4.52       | 2.71 | 4.33       | 2.46 | 4.07       | 2.29 |
|                        | Desert                   | 3.75       | 2.09 | 3.64       | 1.94 | 3.31       | 1.58 |
|                        | Temperate forest         | 4.58       | 2.71 | 4.44       | 2.58 | 4.30       | 2.39 |
|                        | Boreal forest            | 4.50       | 2.50 | 4.41       | 2.40 | 4.14       | 2.17 |

\*SD, standard deviation.

Three alternative ranking schemes of locomotor modes from 1 to 8 sequentially: (a) gliding, arboreal, scansorial, terrestrial, saltatorial, semiaquatic, semifossorial, fossorial; (b) gliding, arboreal, scansorial, terrestrial, semiaquatic, saltatorial, semifossorial, fossorial; and (c) gliding, arboreal, scansorial, terrestrial, semiaquatic, semifossorial, saltatorial, fossorial.



**Table S12.** Descriptive statistics of the ecological occupation of 98 extant, small-bodied mammalian communities by environmental category.

| Environmental category |                          | No. of unique eco-cells occupied | Total count of eco-cells occupied | Average reoccurrence of an eco-cell | % of theoretical ecospace |
|------------------------|--------------------------|----------------------------------|-----------------------------------|-------------------------------------|---------------------------|
| Habitat openness       | Closed                   | 86                               | 510                               | 5.93                                | 35.83                     |
|                        | Open                     | 56                               | 288                               | 5.14                                | 23.33                     |
| Climate type           | Tropical                 | 65                               | 287                               | 4.42                                | 27.08                     |
|                        | Arid                     | 36                               | 126                               | 3.50                                | 15.00                     |
|                        | Temperate                | 49                               | 182                               | 3.71                                | 20.41                     |
|                        | Cold                     | 32                               | 203                               | 6.34                                | 13.33                     |
| Vegetation type        | Tropical rainforest      | 52                               | 161                               | 3.10                                | 21.67                     |
|                        | Tropical seasonal forest | 56                               | 108                               | 1.93                                | 23.33                     |
|                        | Savanna                  | 15                               | 33                                | 2.20                                | 6.25                      |
|                        | Grassland                | 38                               | 129                               | 3.39                                | 15.83                     |
|                        | Shrubland                | 37                               | 90                                | 2.43                                | 15.42                     |
|                        | Desert                   | 21                               | 36                                | 1.71                                | 8.75                      |
|                        | Temperate forest         | 37                               | 175                               | 4.73                                | 15.42                     |
| Boreal forest          | 20                       | 66                               | 3.30                              | 8.33                                |                           |
| Total                  |                          | 99                               | 798                               | 8.06                                | 41.25                     |

**Table S13.** The statistics of the occurrence in the eco-cells (ecological parameter value combinations) among different environmental categories.

|                                        |           | <b>Habitat openness</b>                |           |                                        |           |
|----------------------------------------|-----------|----------------------------------------|-----------|----------------------------------------|-----------|
| <b>All sampled communities</b>         |           | <b>Open habitat</b>                    |           | <b>Closed habitat</b>                  |           |
| Ecological parameter value combination | Frequency | Ecological parameter value combination | Frequency | Ecological parameter value combination | Frequency |
| <32 g – insectivory – terrestrial      | 67        | 32-128 g – herbivory – terrestrial     | 24        | <32 g – insectivory – terrestrial      | 46        |
| 32-128 g – herbivory – terrestrial     | 61        | <32 g – insectivory – terrestrial      | 21        | 32-128 g – herbivory – terrestrial     | 37        |
| <32 g – omnivory – scansorial          | 38        | 32-128 g – omnivory – terrestrial      | 17        | <32 g – omnivory – scansorial          | 29        |
| <32 g – omnivory – terrestrial         | 35        | <32 g – granivory – terrestrial        | 16        | <32 g – carnivory – terrestrial        | 25        |
| 32-128 g – omnivory – terrestrial      | 34        | <32 g – granivory – semifossorial      | 14        | 128-512 g – omnivory – scansorial      | 25        |
| <32 g – carnivory – terrestrial        | 31        | <32 g – omnivory – terrestrial         | 13        | 128-512 g – omnivory – terrestrial     | 23        |
| 32-128 g – omnivory – scansorial       | 30        | 32-128 g – granivory – terrestrial     | 11        | <32 g – omnivory – terrestrial         | 22        |
| 128-512 g – omnivory – terrestrial     | 28        | <32 g – omnivory – scansorial          | 9         | 32-128 g – omnivory – scansorial       | 22        |
| 128-512 g – omnivory – scansorial      | 25        | 32-128 g – omnivory – semifossorial    | 9         | 32-128 g – omnivory – terrestrial      | 17        |
| <32 g – granivory – terrestrial        | 19        | 32-128 g – granivory – semifossorial   | 9         | 128-512 g – insectivory – terrestrial  | 12        |
| <32 g – granivory – semifossorial      | 18        | 128-512 g – herbivory – terrestrial    | 9         | 512-2048 g – omnivory – scansorial     | 12        |
| 128-512 g – herbivory – terrestrial    | 18        | 32-128 g – omnivory – scansorial       | 8         | 128-512 g – frugivory – scansorial     | 9         |
| 32-128 g – herbivory – semifossorial   | 15        | <32 g – herbivory – terrestrial        | 7         | 128-512 g – herbivory – terrestrial    | 9         |
| 32-128 g – granivory – terrestrial     | 14        | 32-128 g – insectivory – saltatorial   | 7         | 32-128 g – herbivory – semifossorial   | 8         |
| 512-2048 g – omnivory – scansorial     | 13        | 32-128 g – herbivory – semifossorial   | 7         | 512-2048 g – herbivory – terrestrial   | 8         |
| 32-128 g – insectivory – terrestrial   | 12        | 32-128 g – herbivory – saltatorial     | 7         | >2048 g – omnivory – scansorial        | 8         |
| 32-128 g – omnivory – semifossorial    | 12        | <32 g – carnivory – terrestrial        | 6         | 128-512 g – omnivory – arboreal        | 7         |
| 128-512 g – insectivory – terrestrial  | 12        | <32 g – granivory – scansorial         | 6         | >2048 g – herbivory – terrestrial      | 7         |
| <32 g – herbivory – terrestrial        | 11        | 32-128 g – insectivory – terrestrial   | 6         | <32 g – insectivory – scansorial       | 6         |
| 512-2048 g – herbivory – terrestrial   | 10        | 32-128 g – omnivory – saltatorial      | 6         | <32 g – omnivory – saltatorial         | 6         |
| >2048 g – herbivory – terrestrial      | 10        | 128-512 g – omnivory – terrestrial     | 5         | 32-128 g – insectivory – terrestrial   | 6         |
| <32 g – insectivory – scansorial       | 9         | 128-512 g – omnivory – semifossorial   | 5         | 32-128 g – insectivory – scansorial    | 5         |
| 32-128 g – insectivory – scansorial    | 9         | <32 g – granivory – fossorial          | 4         | 32-128 g – omnivory – arboreal         | 5         |
| 32-128 g – granivory – semifossorial   | 9         | 32-128 g – insectivory – scansorial    | 4         | 32-128 g – frugivory – terrestrial     | 5         |
| 128-512 g – frugivory – scansorial     | 9         | 32-128 g – insectivory – semifossorial | 4         | 128-512 g – insectivory – arboreal     | 5         |
| <32 g – omnivory – saltatorial         | 8         | <32 g – insectivory – arboreal         | 3         | 128-512 g – granivory – scansorial     | 5         |
| <32 g – granivory – scansorial         | 8         | <32 g – insectivory – scansorial       | 3         | 512-2048 g – carnivory – semiaquatic   | 5         |
| >2048 g – omnivory – scansorial        | 8         | <32 g – omnivory – semifossorial       | 3         | >2048 g – carnivory – terrestrial      | 5         |
| 32-128 g – insectivory – semifossorial | 7         | 32-128 g – carnivory – scansorial      | 3         | >2048 g – herbivory – arboreal         | 5         |
| 32-128 g – insectivory – saltatorial   | 7         | 32-128 g – granivory – scansorial      | 3         | <32 g – granivory – semifossorial      | 4         |
| 32-128 g – herbivory – saltatorial     | 7         | 128-512 g – herbivory – scansorial     | 3         | <32 g – herbivory – arboreal           | 4         |
| 128-512 g – omnivory – arboreal        | 7         | 512-2048 g – omnivory – terrestrial    | 3         | <32 g – herbivory – terrestrial        | 4         |
| 128-512 g – granivory – scansorial     | 7         | >2048 g – herbivory – terrestrial      | 3         | 32-128 g – omnivory – gliding          | 4         |

|                                        |   |                                        |            |                                        |   |
|----------------------------------------|---|----------------------------------------|------------|----------------------------------------|---|
| 512-2048 g – carnivory – semiaquatic   | 7 | <32 g – omnivory – saltatorial         | 2          | 32-128 g – granivory – arboreal        | 4 |
| 512-2048 g – omnivory – terrestrial    | 7 | 128-512 g – carnivory – terrestrial    | 2          | 128-512 g – carnivory – terrestrial    | 4 |
| >2048 g – carnivory – terrestrial      | 7 | 128-512 g – granivory – scansorial     | 2          | 128-512 g – insectivory – scansorial   | 4 |
| 32-128 g – omnivory – saltatorial      | 6 | 512-2048 g – carnivory – semiaquatic   | 2          | 512-2048 g – omnivory – arboreal       | 4 |
| 128-512 g – carnivory – terrestrial    | 6 | 512-2048 g – omnivory – semiaquatic    | 2          | 512-2048 g – omnivory – terrestrial    | 4 |
| <32 g – omnivory – semifossorial       | 5 | 512-2048 g – herbivory – terrestrial   | 2          | >2048 g – omnivory – arboreal          | 4 |
| 32-128 g – carnivory – scansorial      | 5 | >2048 g – carnivory – terrestrial      | 2          | <32 g – omnivory – arboreal            | 3 |
| 32-128 g – omnivory – arboreal         | 5 | <32 g – omnivory – arboreal            | 1          | <32 g – omnivory – semiaquatic         | 3 |
| 32-128 g – granivory – arboreal        | 5 | <32 g – granivory – saltatorial        | 1          | <32 g – granivory – terrestrial        | 3 |
| 32-128 g – granivory – scansorial      | 5 | <32 g – herbivory – semifossorial      | 1          | 32-128 g – insectivory – semifossorial | 3 |
| 32-128 g – frugivory – terrestrial     | 5 | 32-128 g – carnivory – terrestrial     | 1          | 32-128 g – insectivory – fossorial     | 3 |
| 128-512 g – insectivory – arboreal     | 5 | 32-128 g – carnivory – fossorial       | 1          | 32-128 g – omnivory – semifossorial    | 3 |
| 128-512 g – omnivory – semifossorial   | 5 | 32-128 g – granivory – arboreal        | 1          | 32-128 g – granivory – terrestrial     | 3 |
| >2048 g – herbivory – arboreal         | 5 | 32-128 g – granivory – saltatorial     | 1          | 128-512 g – omnivory – gliding         | 3 |
| <32 g – omnivory – arboreal            | 4 | 32-128 g – herbivory – scansorial      | 1          | 128-512 g – frugivory – terrestrial    | 3 |
| <32 g – granivory – fossorial          | 4 | 128-512 g – omnivory – gliding         | 1          | 512-2048 g – insectivory – terrestrial | 3 |
| <32 g – herbivory – arboreal           | 4 | 512-2048 g – insectivory – terrestrial | 1          | 512-2048 g – granivory – arboreal      | 3 |
| 32-128 g – omnivory – gliding          | 4 | 512-2048 g – omnivory – scansorial     | 1          | >2048 g – frugivory – arboreal         | 3 |
| 128-512 g – insectivory – scansorial   | 4 | 512-2048 g – herbivory – semiaquatic   | 1          | <32 g – omnivory – semifossorial       | 2 |
| 128-512 g – omnivory – gliding         | 4 | 512-2048 g – herbivory – saltatorial   | 1          | <32 g – granivory – scansorial         | 2 |
| 512-2048 g – insectivory – terrestrial | 4 | >2048 g – carnivory – scansorial       | 1          | <32 g – frugivory – arboreal           | 2 |
| 512-2048 g – omnivory – arboreal       | 4 | >2048 g – insectivory – fossorial      | 1          | <32 g – herbivory – semifossorial      | 2 |
| >2048 g – omnivory – arboreal          | 4 | >2048 g – herbivory – saltatorial      | 1          | 32-128 g – carnivory – scansorial      | 2 |
| <32 g – insectivory – arboreal         | 3 | <b>Total</b>                           | <b>288</b> | 32-128 g – carnivory – terrestrial     | 2 |
| <32 g – omnivory – semiaquatic         | 3 |                                        |            | 32-128 g – granivory – scansorial      | 2 |
| <32 g – herbivory – semifossorial      | 3 |                                        |            | 32-128 g – frugivory – arboreal        | 2 |
| 32-128 g – carnivory – terrestrial     | 3 |                                        |            | 32-128 g – frugivory – scansorial      | 2 |
| 32-128 g – insectivory – fossorial     | 3 |                                        |            | 128-512 g – granivory – terrestrial    | 2 |
| 128-512 g – frugivory – terrestrial    | 3 |                                        |            | 512-2048 g – herbivory – scansorial    | 2 |
| 128-512 g – herbivory – scansorial     | 3 |                                        |            | >2048 g – insectivory – scansorial     | 2 |
| 512-2048 g – granivory – arboreal      | 3 |                                        |            | >2048 g – insectivory – terrestrial    | 2 |
| >2048 g – frugivory – arboreal         | 3 |                                        |            | >2048 g – omnivory – terrestrial       | 2 |
| <32 g – granivory – saltatorial        | 2 |                                        |            | >2048 g – frugivory – terrestrial      | 2 |
| <32 g – frugivory – arboreal           | 2 |                                        |            | <32 g – carnivory – fossorial          | 1 |
| 32-128 g – carnivory – fossorial       | 2 |                                        |            | <32 g – insectivory – semifossorial    | 1 |
| 32-128 g – frugivory – arboreal        | 2 |                                        |            | <32 g – omnivory – fossorial           | 1 |
| 32-128 g – frugivory – scansorial      | 2 |                                        |            | <32 g – granivory – arboreal           | 1 |
| 128-512 g – granivory – terrestrial    | 2 |                                        |            | <32 g – granivory – saltatorial        | 1 |

|                                        |            |                                        |            |
|----------------------------------------|------------|----------------------------------------|------------|
| 512-2048 g – omnivory – semiaquatic    | 2          | <32 g – frugivory – scansorial         | 1          |
| 512-2048 g – herbivory – scansorial    | 2          | 32-128 g – carnivory – fossorial       | 1          |
| 512-2048 g – herbivory – semiaquatic   | 2          | 32-128 g – insectivory – arboreal      | 1          |
| >2048 g – insectivory – scansorial     | 2          | 32-128 g – herbivory – arboreal        | 1          |
| >2048 g – insectivory – terrestrial    | 2          | 128-512 g – carnivory – arboreal       | 1          |
| >2048 g – insectivory – fossorial      | 2          | 128-512 g – omnivory – semiaquatic     | 1          |
| >2048 g – omnivory – terrestrial       | 2          | 128-512 g – herbivory – arboreal       | 1          |
| >2048 g – frugivory – terrestrial      | 2          | 512-2048 g – carnivory – arboreal      | 1          |
| >2048 g – herbivory – saltatorial      | 2          | 512-2048 g – carnivory – scansorial    | 1          |
| <32 g – carnivory – fossorial          | 1          | 512-2048 g – carnivory – terrestrial   | 1          |
| <32 g – insectivory – semifossorial    | 1          | 512-2048 g – insectivory – semiaquatic | 1          |
| <32 g – omnivory – fossorial           | 1          | 512-2048 g – frugivory – arboreal      | 1          |
| <32 g – granivory – arboreal           | 1          | 512-2048 g – herbivory – semiaquatic   | 1          |
| <32 g – frugivory – scansorial         | 1          | >2048 g – insectivory – fossorial      | 1          |
| 32-128 g – insectivory – arboreal      | 1          | >2048 g – herbivory – saltatorial      | 1          |
| 32-128 g – granivory – saltatorial     | 1          | <b>Total</b>                           | <b>510</b> |
| 32-128 g – herbivory – arboreal        | 1          |                                        |            |
| 32-128 g – herbivory – scansorial      | 1          |                                        |            |
| 128-512 g – carnivory – arboreal       | 1          |                                        |            |
| 128-512 g – omnivory – semiaquatic     | 1          |                                        |            |
| 128-512 g – herbivory – arboreal       | 1          |                                        |            |
| 512-2048 g – carnivory – arboreal      | 1          |                                        |            |
| 512-2048 g – carnivory – scansorial    | 1          |                                        |            |
| 512-2048 g – carnivory – terrestrial   | 1          |                                        |            |
| 512-2048 g – insectivory – semiaquatic | 1          |                                        |            |
| 512-2048 g – frugivory – arboreal      | 1          |                                        |            |
| 512-2048 g – herbivory – saltatorial   | 1          |                                        |            |
| >2048 g – carnivory – scansorial       | 1          |                                        |            |
| <b>Total</b>                           | <b>798</b> |                                        |            |

### Climate type

| Tropical                               |           | Arid                                   |           | Temperate                              |           |
|----------------------------------------|-----------|----------------------------------------|-----------|----------------------------------------|-----------|
| Ecological parameter value combination | Frequency | Ecological parameter value combination | Frequency | Ecological parameter value combination | Frequency |
| 128-512 g – omnivory – terrestrial     | 23        | <32 g – granivory – terrestrial        | 13        | <32 g – insectivory – terrestrial      | 23        |
| 32-128 g – omnivory – terrestrial      | 22        | <32 g – insectivory – terrestrial      | 8         | <32 g – carnivory – terrestrial        | 22        |
| 32-128 g – omnivory – scansorial       | 16        | <32 g – omnivory – terrestrial         | 8         | <32 g – omnivory – scansorial          | 21        |
| 128-512 g – omnivory – scansorial      | 15        | 32-128 g – omnivory – terrestrial      | 7         | 32-128 g – herbivory – terrestrial     | 18        |
| <32 g – insectivory – terrestrial      | 13        | 32-128 g – omnivory – semifossorial    | 7         | <32 g – omnivory – terrestrial         | 13        |

|                                        |    |                                        |            |                                        |   |
|----------------------------------------|----|----------------------------------------|------------|----------------------------------------|---|
| 128-512 g – insectivory – terrestrial  | 12 | 32-128 g – granivory – terrestrial     | 7          | 128-512 g – omnivory – scansorial      | 7 |
| 128-512 g – frugivory – scansorial     | 9  | <32 g – granivory – scansorial         | 6          | 32-128 g – omnivory – scansorial       | 6 |
| 128-512 g – herbivory – terrestrial    | 8  | 32-128 g – omnivory – saltatorial      | 6          | 32-128 g – omnivory – terrestrial      | 5 |
| <32 g – omnivory – terrestrial         | 7  | 32-128 g – herbivory – terrestrial     | 5          | 32-128 g – herbivory – semifossorial   | 4 |
| 32-128 g – insectivory – terrestrial   | 7  | <32 g – carnivory – terrestrial        | 4          | >2048 g – omnivory – scansorial        | 4 |
| 128-512 g – omnivory – arboreal        | 7  | <32 g – granivory – fossorial          | 4          | <32 g – omnivory – semifossorial       | 3 |
| 512-2048 g – omnivory – terrestrial    | 7  | 32-128 g – insectivory – semifossorial | 4          | 32-128 g – insectivory – semifossorial | 3 |
| 32-128 g – granivory – terrestrial     | 6  | 32-128 g – omnivory – scansorial       | 4          | 32-128 g – granivory – scansorial      | 3 |
| <32 g – carnivory – terrestrial        | 5  | 128-512 g – omnivory – semifossorial   | 4          | 512-2048 g – omnivory – scansorial     | 3 |
| <32 g – insectivory – scansorial       | 5  | <32 g – insectivory – arboreal         | 3          | 512-2048 g – herbivory – terrestrial   | 3 |
| 32-128 g – insectivory – scansorial    | 5  | <32 g – insectivory – scansorial       | 3          | <32 g – omnivory – semiaquatic         | 2 |
| 32-128 g – omnivory – arboreal         | 5  | 32-128 g – carnivory – scansorial      | 3          | <32 g – granivory – scansorial         | 2 |
| 32-128 g – omnivory – semifossorial    | 5  | 32-128 g – insectivory – scansorial    | 3          | <32 g – granivory – terrestrial        | 2 |
| 32-128 g – frugivory – terrestrial     | 5  | 32-128 g – insectivory – terrestrial   | 3          | 32-128 g – insectivory – terrestrial   | 2 |
| 128-512 g – insectivory – arboreal     | 5  | 32-128 g – herbivory – saltatorial     | 3          | 32-128 g – insectivory – fossorial     | 2 |
| >2048 g – herbivory – arboreal         | 5  | 128-512 g – omnivory – terrestrial     | 3          | 128-512 g – carnivory – terrestrial    | 2 |
| <32 g – omnivory – arboreal            | 4  | <32 g – herbivory – terrestrial        | 2          | 128-512 g – herbivory – terrestrial    | 2 |
| <32 g – granivory – terrestrial        | 4  | 32-128 g – granivory – scansorial      | 2          | 512-2048 g – carnivory – semiaquatic   | 2 |
| <32 g – herbivory – arboreal           | 4  | 128-512 g – herbivory – scansorial     | 2          | >2048 g – carnivory – terrestrial      | 2 |
| 32-128 g – granivory – arboreal        | 4  | <32 g – omnivory – semifossorial       | 1          | >2048 g – herbivory – terrestrial      | 2 |
| 128-512 g – insectivory – scansorial   | 4  | <32 g – granivory – semifossorial      | 1          | <32 g – carnivory – fossorial          | 1 |
| 512-2048 g – omnivory – arboreal       | 4  | <32 g – herbivory – semifossorial      | 1          | <32 g – insectivory – scansorial       | 1 |
| 512-2048 g – omnivory – scansorial     | 4  | 32-128 g – carnivory – terrestrial     | 1          | <32 g – insectivory – semifossorial    | 1 |
| 512-2048 g – herbivory – terrestrial   | 4  | 32-128 g – granivory – saltatorial     | 1          | <32 g – omnivory – saltatorial         | 1 |
| >2048 g – omnivory – arboreal          | 4  | 32-128 g – herbivory – semifossorial   | 1          | <32 g – granivory – arboreal           | 1 |
| >2048 g – omnivory – scansorial        | 4  | 128-512 g – herbivory – terrestrial    | 1          | <32 g – granivory – saltatorial        | 1 |
| 128-512 g – frugivory – terrestrial    | 3  | 512-2048 g – herbivory – saltatorial   | 1          | <32 g – frugivory – arboreal           | 1 |
| 512-2048 g – insectivory – terrestrial | 3  | >2048 g – carnivory – scansorial       | 1          | <32 g – herbivory – terrestrial        | 1 |
| 512-2048 g – granivory – arboreal      | 3  | >2048 g – carnivory – terrestrial      | 1          | <32 g – herbivory – semifossorial      | 1 |
| >2048 g – frugivory – arboreal         | 3  | >2048 g – insectivory – fossorial      | 1          | 32-128 g – carnivory – fossorial       | 1 |
| 32-128 g – carnivory – scansorial      | 2  | >2048 g – herbivory – saltatorial      | 1          | 32-128 g – insectivory – arboreal      | 1 |
| 32-128 g – carnivory – terrestrial     | 2  | <b>Total</b>                           | <b>126</b> | 32-128 g – insectivory – scansorial    | 1 |
| 32-128 g – omnivory – gliding          | 2  |                                        |            | 32-128 g – omnivory – gliding          | 1 |
| 32-128 g – frugivory – arboreal        | 2  |                                        |            | 32-128 g – granivory – arboreal        | 1 |
| 32-128 g – frugivory – scansorial      | 2  |                                        |            | 32-128 g – granivory – terrestrial     | 1 |
| 32-128 g – herbivory – terrestrial     | 2  |                                        |            | 32-128 g – granivory – semifossorial   | 1 |
| 128-512 g – granivory – terrestrial    | 2  |                                        |            | 32-128 g – herbivory – scansorial      | 1 |
| 512-2048 g – carnivory – semiaquatic   | 2  |                                        |            | 128-512 g – omnivory – terrestrial     | 1 |

|                                        |            |
|----------------------------------------|------------|
| 512-2048 g – herbivory – scansorial    | 2          |
| >2048 g – carnivory – terrestrial      | 2          |
| >2048 g – insectivory – scansorial     | 2          |
| >2048 g – insectivory – terrestrial    | 2          |
| >2048 g – frugivory – terrestrial      | 2          |
| <32 g – omnivory – semifossorial       | 1          |
| <32 g – omnivory – fossorial           | 1          |
| <32 g – frugivory – arboreal           | 1          |
| <32 g – frugivory – scansorial         | 1          |
| <32 g – herbivory – terrestrial        | 1          |
| 32-128 g – herbivory – arboreal        | 1          |
| 128-512 g – carnivory – arboreal       | 1          |
| 128-512 g – omnivory – semiaquatic     | 1          |
| 512-2048 g – carnivory – arboreal      | 1          |
| 512-2048 g – carnivory – scansorial    | 1          |
| 512-2048 g – carnivory – terrestrial   | 1          |
| 512-2048 g – insectivory – semiaquatic | 1          |
| 512-2048 g – frugivory – arboreal      | 1          |
| >2048 g – insectivory – fossorial      | 1          |
| >2048 g – omnivory – terrestrial       | 1          |
| >2048 g – herbivory – terrestrial      | 1          |
| >2048 g – herbivory – saltatorial      | 1          |
| <b>Total</b>                           | <b>287</b> |

|                                      |            |
|--------------------------------------|------------|
| 128-512 g – omnivory – semifossorial | 1          |
| 128-512 g – granivory – scansorial   | 1          |
| 128-512 g – herbivory – arboreal     | 1          |
| 128-512 g – herbivory – scansorial   | 1          |
| 512-2048 g – herbivory – semiaquatic | 1          |
| >2048 g – omnivory – terrestrial     | 1          |
| <b>Total</b>                         | <b>182</b> |

| <b>Cold</b>                            |           |
|----------------------------------------|-----------|
| Ecological parameter value combination | Frequency |
| 32-128 g – herbivory – terrestrial     | 36        |
| <32 g – insectivory – terrestrial      | 23        |
| <32 g – omnivory – scansorial          | 17        |
| <32 g – granivory – semifossorial      | 17        |
| 32-128 g – herbivory – semifossorial   | 10        |
| 32-128 g – granivory – semifossorial   | 8         |
| <32 g – omnivory – terrestrial         | 7         |
| <32 g – omnivory – saltatorial         | 7         |
| <32 g – herbivory – terrestrial        | 7         |

|                                        |            |
|----------------------------------------|------------|
| 32-128 g – insectivory – saltatorial   | 7          |
| 128-512 g – herbivory – terrestrial    | 7          |
| >2048 g – herbivory – terrestrial      | 7          |
| 128-512 g – granivory – scansorial     | 6          |
| 512-2048 g – omnivory – scansorial     | 6          |
| 32-128 g – omnivory – scansorial       | 4          |
| 32-128 g – herbivory – saltatorial     | 4          |
| 128-512 g – carnivory – terrestrial    | 4          |
| 128-512 g – omnivory – gliding         | 4          |
| 128-512 g – omnivory – scansorial      | 3          |
| 512-2048 g – carnivory – semiaquatic   | 3          |
| 512-2048 g – herbivory – terrestrial   | 3          |
| 512-2048 g – omnivory – semiaquatic    | 2          |
| >2048 g – carnivory – terrestrial      | 2          |
| <32 g – omnivory – semiaquatic         | 1          |
| <32 g – granivory – saltatorial        | 1          |
| <32 g – herbivory – semifossorial      | 1          |
| 32-128 g – carnivory – fossorial       | 1          |
| 32-128 g – insectivory – fossorial     | 1          |
| 32-128 g – omnivory – gliding          | 1          |
| 128-512 g – omnivory – terrestrial     | 1          |
| 512-2048 g – insectivory – terrestrial | 1          |
| 512-2048 g – herbivory – semiaquatic   | 1          |
| <b>Total</b>                           | <b>203</b> |

### Vegetation type

| Tropical rainforest                    |           | Tropical seasonal forest               |           | Savanna                                |           |
|----------------------------------------|-----------|----------------------------------------|-----------|----------------------------------------|-----------|
| Ecological parameter value combination | Frequency | Ecological parameter value combination | Frequency | Ecological parameter value combination | Frequency |
| 128-512 g – omnivory – terrestrial     | 17        | 32-128 g – omnivory – terrestrial      | 10        | 32-128 g – omnivory – terrestrial      | 7         |
| 128-512 g – insectivory – terrestrial  | 12        | 128-512 g – omnivory – scansorial      | 6         | 32-128 g – granivory – terrestrial     | 4         |
| 32-128 g – omnivory – scansorial       | 11        | <32 g – insectivory – terrestrial      | 5         | <32 g – granivory – terrestrial        | 3         |
| 128-512 g – omnivory – scansorial      | 10        | 32-128 g – omnivory – scansorial       | 5         | 32-128 g – omnivory – semifossorial    | 3         |

|                                      |   |                                        |   |                                      |           |
|--------------------------------------|---|----------------------------------------|---|--------------------------------------|-----------|
| <32 g – insectivory – terrestrial    | 7 | 128-512 g – omnivory – terrestrial     | 5 | <32 g – carnivory – terrestrial      | 2         |
| 32-128 g – omnivory – terrestrial    | 6 | 128-512 g – frugivory – scansorial     | 4 | <32 g – omnivory – terrestrial       | 2         |
| 128-512 g – omnivory – arboreal      | 6 | 32-128 g – insectivory – terrestrial   | 3 | 32-128 g – insectivory – terrestrial | 2         |
| 32-128 g – insectivory – scansorial  | 5 | 32-128 g – omnivory – semifossorial    | 3 | 32-128 g – herbivory – terrestrial   | 2         |
| 32-128 g – frugivory – terrestrial   | 5 | >2048 g – omnivory – scansorial        | 3 | 512-2048 g – omnivory – terrestrial  | 2         |
| 128-512 g – frugivory – scansorial   | 5 | >2048 g – herbivory – arboreal         | 3 | <32 g – insectivory – terrestrial    | 1         |
| 128-512 g – herbivory – terrestrial  | 5 | <32 g – carnivory – terrestrial        | 2 | <32 g – omnivory – arboreal          | 1         |
| 32-128 g – granivory – arboreal      | 4 | <32 g – insectivory – scansorial       | 2 | 128-512 g – omnivory – terrestrial   | 1         |
| 128-512 g – insectivory – arboreal   | 4 | <32 g – omnivory – arboreal            | 2 | 128-512 g – herbivory – terrestrial  | 1         |
| <32 g – insectivory – scansorial     | 3 | <32 g – omnivory – scansorial          | 2 | >2048 g – insectivory – fossorial    | 1         |
| <32 g – herbivory – arboreal         | 3 | <32 g – omnivory – semifossorial       | 2 | >2048 g – herbivory – saltatorial    | 1         |
| 32-128 g – insectivory – terrestrial | 3 | 32-128 g – omnivory – arboreal         | 2 | <b>Total</b>                         | <b>33</b> |
| 32-128 g – omnivory – arboreal       | 3 | 32-128 g – frugivory – scansorial      | 2 |                                      |           |
| 512-2048 g – omnivory – terrestrial  | 3 | 32-128 g – herbivory – terrestrial     | 2 |                                      |           |
| >2048 g – omnivory – arboreal        | 3 | 128-512 g – insectivory – scansorial   | 2 |                                      |           |
| <32 g – carnivory – terrestrial      | 2 | 128-512 g – herbivory – terrestrial    | 2 |                                      |           |
| <32 g – omnivory – terrestrial       | 2 | 512-2048 g – carnivory – semiaquatic   | 2 |                                      |           |
| 32-128 g – granivory – terrestrial   | 2 | 512-2048 g – insectivory – terrestrial | 2 |                                      |           |
| 32-128 g – frugivory – arboreal      | 2 | 512-2048 g – omnivory – arboreal       | 2 |                                      |           |
| 128-512 g – insectivory – scansorial | 2 | 512-2048 g – omnivory – scansorial     | 2 |                                      |           |
| 128-512 g – granivory – terrestrial  | 2 | >2048 g – frugivory – arboreal         | 2 |                                      |           |
| 128-512 g – frugivory – terrestrial  | 2 | <32 g – insectivory – semifossorial    | 1 |                                      |           |
| 512-2048 g – omnivory – arboreal     | 2 | <32 g – omnivory – terrestrial         | 1 |                                      |           |
| 512-2048 g – omnivory – scansorial   | 2 | <32 g – omnivory – fossorial           | 1 |                                      |           |
| 512-2048 g – granivory – arboreal    | 2 | <32 g – granivory – terrestrial        | 1 |                                      |           |
| 512-2048 g – herbivory – terrestrial | 2 | <32 g – frugivory – arboreal           | 1 |                                      |           |
| >2048 g – omnivory – scansorial      | 2 | <32 g – herbivory – arboreal           | 1 |                                      |           |
| >2048 g – herbivory – arboreal       | 2 | 32-128 g – carnivory – scansorial      | 1 |                                      |           |
| <32 g – omnivory – arboreal          | 1 | 32-128 g – carnivory – terrestrial     | 1 |                                      |           |
| <32 g – frugivory – arboreal         | 1 | 32-128 g – insectivory – arboreal      | 1 |                                      |           |
| <32 g – frugivory – scansorial       | 1 | 32-128 g – insectivory – semifossorial | 1 |                                      |           |
| <32 g – herbivory – terrestrial      | 1 | 32-128 g – omnivory – gliding          | 1 |                                      |           |
| 32-128 g – carnivory – scansorial    | 1 | 32-128 g – granivory – terrestrial     | 1 |                                      |           |
| 32-128 g – carnivory – terrestrial   | 1 | 128-512 g – carnivory – arboreal       | 1 |                                      |           |
| 32-128 g – omnivory – gliding        | 1 | 128-512 g – insectivory – arboreal     | 1 |                                      |           |
| 32-128 g – herbivory – arboreal      | 1 | 128-512 g – omnivory – arboreal        | 1 |                                      |           |
| 512-2048 g – carnivory – arboreal    | 1 | 128-512 g – omnivory – semiaquatic     | 1 |                                      |           |
| 512-2048 g – carnivory – terrestrial | 1 | 128-512 g – frugivory – terrestrial    | 1 |                                      |           |



|                                        |            |                                      |            |
|----------------------------------------|------------|--------------------------------------|------------|
| 512-2048 g – insectivory – terrestrial | 1          | 128-512 g – herbivory – arboreal     | 1          |
| 512-2048 g – insectivory – semiaquatic | 1          | 512-2048 g – carnivory – scansorial  | 1          |
| 512-2048 g – frugivory – arboreal      | 1          | 512-2048 g – omnivory – terrestrial  | 1          |
| 512-2048 g – herbivory – scansorial    | 1          | 512-2048 g – granivory – arboreal    | 1          |
| >2048 g – carnivory – terrestrial      | 1          | 512-2048 g – herbivory – scansorial  | 1          |
| >2048 g – insectivory – scansorial     | 1          | 512-2048 g – herbivory – terrestrial | 1          |
| >2048 g – insectivory – terrestrial    | 1          | >2048 g – carnivory – terrestrial    | 1          |
| >2048 g – omnivory – terrestrial       | 1          | >2048 g – insectivory – scansorial   | 1          |
| >2048 g – frugivory – arboreal         | 1          | >2048 g – insectivory – terrestrial  | 1          |
| >2048 g – frugivory – terrestrial      | 1          | >2048 g – insectivory – fossorial    | 1          |
| <b>Total</b>                           | <b>161</b> | >2048 g – omnivory – arboreal        | 1          |
|                                        |            | >2048 g – frugivory – terrestrial    | 1          |
|                                        |            | >2048 g – herbivory – terrestrial    | 1          |
|                                        |            | >2048 g – herbivory – saltatorial    | 1          |
|                                        |            | <b>Total</b>                         | <b>108</b> |

| <b>Grassland</b>                       |           | <b>Shrubland</b>                       |           | <b>Desert</b>                          |           |
|----------------------------------------|-----------|----------------------------------------|-----------|----------------------------------------|-----------|
| Ecological parameter value combination | Frequency | Ecological parameter value combination | Frequency | Ecological parameter value combination | Frequency |
| <32 g – insectivory – terrestrial      | 12        | 32-128 g – herbivory – terrestrial     | 12        | <32 g – granivory – terrestrial        | 5         |
| 32-128 g – herbivory – terrestrial     | 10        | <32 g – insectivory – terrestrial      | 7         | <32 g – granivory – scansorial         | 2         |
| <32 g – granivory – semifossorial      | 9         | <32 g – omnivory – scansorial          | 4         | <32 g – granivory – fossorial          | 2         |
| <32 g – omnivory – terrestrial         | 8         | <32 g – granivory – scansorial         | 4         | 32-128 g – insectivory – scansorial    | 2         |
| 32-128 g – omnivory – semifossorial    | 6         | <32 g – granivory – terrestrial        | 4         | 32-128 g – insectivory – saltatorial   | 2         |
| 32-128 g – granivory – semifossorial   | 6         | <32 g – granivory – semifossorial      | 4         | 32-128 g – omnivory – scansorial       | 2         |
| 128-512 g – herbivory – terrestrial    | 6         | <32 g – herbivory – terrestrial        | 4         | 32-128 g – omnivory – terrestrial      | 2         |
| <32 g – omnivory – scansorial          | 5         | 32-128 g – omnivory – terrestrial      | 4         | 32-128 g – omnivory – saltatorial      | 2         |
| 32-128 g – insectivory – saltatorial   | 5         | 32-128 g – omnivory – saltatorial      | 4         | 32-128 g – granivory – terrestrial     | 2         |
| 32-128 g – herbivory – saltatorial     | 5         | <32 g – insectivory – arboreal         | 3         | 32-128 g – granivory – semifossorial   | 2         |
| <32 g – carnivory – terrestrial        | 4         | <32 g – omnivory – terrestrial         | 3         | 32-128 g – herbivory – semifossorial   | 2         |
| <32 g – granivory – terrestrial        | 4         | 32-128 g – omnivory – scansorial       | 3         | 32-128 g – herbivory – saltatorial     | 2         |
| 32-128 g – omnivory – terrestrial      | 4         | 32-128 g – granivory – terrestrial     | 3         | <32 g – insectivory – terrestrial      | 1         |
| 32-128 g – herbivory – semifossorial   | 4         | 128-512 g – omnivory – semifossorial   | 3         | <32 g – granivory – semifossorial      | 1         |
| 128-512 g – omnivory – terrestrial     | 4         | <32 g – granivory – fossorial          | 2         | <32 g – herbivory – semifossorial      | 1         |
| <32 g – insectivory – scansorial       | 3         | 32-128 g – insectivory – scansorial    | 2         | 32-128 g – insectivory – terrestrial   | 1         |

|                                        |            |                                        |           |                                      |           |
|----------------------------------------|------------|----------------------------------------|-----------|--------------------------------------|-----------|
| <32 g – herbivory – terrestrial        | 3          | 32-128 g – insectivory – semifossorial | 2         | 32-128 g – granivory – scansorial    | 1         |
| 32-128 g – carnivory – scansorial      | 3          | 128-512 g – herbivory – scansorial     | 2         | 32-128 g – granivory – saltatorial   | 1         |
| 32-128 g – omnivory – scansorial       | 3          | >2048 g – carnivory – terrestrial      | 2         | 128-512 g – omnivory – semifossorial | 1         |
| <32 g – omnivory – semifossorial       | 2          | <32 g – omnivory – semifossorial       | 1         | 128-512 g – herbivory – scansorial   | 1         |
| 32-128 g – insectivory – terrestrial   | 2          | <32 g – omnivory – saltatorial         | 1         | 128-512 g – herbivory – terrestrial  | 1         |
| 32-128 g – insectivory – semifossorial | 2          | 32-128 g – carnivory – terrestrial     | 1         | <b>Total</b>                         | <b>36</b> |
| 32-128 g – granivory – terrestrial     | 2          | 32-128 g – insectivory – terrestrial   | 1         |                                      |           |
| 512-2048 g – omnivory – semiaquatic    | 2          | 32-128 g – granivory – scansorial      | 1         |                                      |           |
| >2048 g – herbivory – terrestrial      | 2          | 32-128 g – granivory – semifossorial   | 1         |                                      |           |
| <32 g – omnivory – saltatorial         | 1          | 32-128 g – herbivory – semifossorial   | 1         |                                      |           |
| <32 g – granivory – saltatorial        | 1          | 128-512 g – carnivory – terrestrial    | 1         |                                      |           |
| 32-128 g – carnivory – fossorial       | 1          | 128-512 g – granivory – scansorial     | 1         |                                      |           |
| 32-128 g – granivory – arboreal        | 1          | 128-512 g – herbivory – terrestrial    | 1         |                                      |           |
| 32-128 g – granivory – scansorial      | 1          | 512-2048 g – carnivory – semiaquatic   | 1         |                                      |           |
| 32-128 g – herbivory – scansorial      | 1          | 512-2048 g – insectivory – terrestrial | 1         |                                      |           |
| 128-512 g – carnivory – terrestrial    | 1          | 512-2048 g – omnivory – scansorial     | 1         |                                      |           |
| 128-512 g – omnivory – gliding         | 1          | 512-2048 g – herbivory – terrestrial   | 1         |                                      |           |
| 128-512 g – omnivory – semifossorial   | 1          | 512-2048 g – herbivory – semiaquatic   | 1         |                                      |           |
| 128-512 g – granivory – scansorial     | 1          | 512-2048 g – herbivory – saltatorial   | 1         |                                      |           |
| 512-2048 g – carnivory – semiaquatic   | 1          | >2048 g – carnivory – scansorial       | 1         |                                      |           |
| 512-2048 g – omnivory – terrestrial    | 1          | >2048 g – herbivory – terrestrial      | 1         |                                      |           |
| 512-2048 g – herbivory – terrestrial   | 1          | <b>Total</b>                           | <b>90</b> |                                      |           |
| <b>Total</b>                           | <b>129</b> |                                        |           |                                      |           |

| <b>Temperate forest</b>                |           | <b>Boreal forest</b>                   |           |
|----------------------------------------|-----------|----------------------------------------|-----------|
| Ecological parameter value combination | Frequency | Ecological parameter value combination | Frequency |
| <32 g – insectivory – terrestrial      | 25        | 32-128 g – herbivory – terrestrial     | 16        |
| <32 g – carnivory – terrestrial        | 21        | <32 g – insectivory – terrestrial      | 9         |
| <32 g – omnivory – scansorial          | 21        | <32 g – omnivory – scansorial          | 6         |
| 32-128 g – herbivory – terrestrial     | 19        | <32 g – omnivory – terrestrial         | 5         |
| <32 g – omnivory – terrestrial         | 14        | <32 g – granivory – semifossorial      | 4         |

|                                        |            |                                      |           |
|----------------------------------------|------------|--------------------------------------|-----------|
| 128-512 g – omnivory – scansorial      | 8          | <32 g – omnivory – saltatorial       | 3         |
| 512-2048 g – omnivory – scansorial     | 6          | 32-128 g – omnivory – scansorial     | 3         |
| 32-128 g – herbivory – semifossorial   | 5          | 32-128 g – herbivory – semifossorial | 3         |
| 512-2048 g – herbivory – terrestrial   | 5          | <32 g – herbivory – terrestrial      | 2         |
| >2048 g – herbivory – terrestrial      | 4          | 128-512 g – omnivory – gliding       | 2         |
| <32 g – omnivory – saltatorial         | 3          | 128-512 g – granivory – scansorial   | 2         |
| 32-128 g – insectivory – fossorial     | 3          | 512-2048 g – omnivory – scansorial   | 2         |
| 32-128 g – omnivory – scansorial       | 3          | >2048 g – herbivory – terrestrial    | 2         |
| 128-512 g – carnivory – terrestrial    | 3          | <32 g – omnivory – semiaquatic       | 1         |
| 128-512 g – granivory – scansorial     | 3          | <32 g – herbivory – semifossorial    | 1         |
| >2048 g – omnivory – scansorial        | 3          | 128-512 g – carnivory – terrestrial  | 1         |
| <32 g – omnivory – semiaquatic         | 2          | 128-512 g – omnivory – scansorial    | 1         |
| <32 g – granivory – scansorial         | 2          | 128-512 g – herbivory – terrestrial  | 1         |
| <32 g – granivory – terrestrial        | 2          | 512-2048 g – carnivory – semiaquatic | 1         |
| 32-128 g – insectivory – semifossorial | 2          | >2048 g – carnivory – terrestrial    | 1         |
| 32-128 g – omnivory – gliding          | 2          | <b>Total</b>                         | <b>66</b> |
| 32-128 g – granivory – scansorial      | 2          |                                      |           |
| 512-2048 g – carnivory – semiaquatic   | 2          |                                      |           |
| >2048 g – carnivory – terrestrial      | 2          |                                      |           |
| <32 g – carnivory – fossorial          | 1          |                                      |           |
| <32 g – insectivory – scansorial       | 1          |                                      |           |
| <32 g – granivory – arboreal           | 1          |                                      |           |
| <32 g – granivory – saltatorial        | 1          |                                      |           |
| <32 g – herbivory – terrestrial        | 1          |                                      |           |
| <32 g – herbivory – semifossorial      | 1          |                                      |           |
| 32-128 g – carnivory – fossorial       | 1          |                                      |           |
| 32-128 g – omnivory – terrestrial      | 1          |                                      |           |
| 128-512 g – omnivory – gliding         | 1          |                                      |           |
| 128-512 g – omnivory – terrestrial     | 1          |                                      |           |
| 128-512 g – herbivory – terrestrial    | 1          |                                      |           |
| 512-2048 g – herbivory – semiaquatic   | 1          |                                      |           |
| >2048 g – omnivory – terrestrial       | 1          |                                      |           |
| <b>Total</b>                           | <b>175</b> |                                      |           |

### Extinct Mammaliaform Communities

| Jiulongshan                            |           | Tiaojishan                             |           | Lujiatun-Jianshangou                      |           |
|----------------------------------------|-----------|----------------------------------------|-----------|-------------------------------------------|-----------|
| Ecological parameter value combination | Frequency | Ecological parameter value combination | Frequency | Ecological parameter value combination    | Frequency |
| <32 g – insectivory – terrestrial      | 1         | <32 g – insectivory – scansorial       | 1         | <32 g – insectivory – arboreal            | 1         |
| <32-128 g – insectivory – gliding      | 1         | <32 g – insectivory – fossorial        | 1         | <32 g – insectivory – scansorial          | 1         |
| 32-128 g – omnivory – arboreal         | 1         | 32-128 g – omnivory – gliding          | 1         | 32-128 g – carnivory – scansorial         | 1         |
| 128-512 g – omnivory – terrestrial     | 1         | 32-128 g – omnivory – arboreal         | 3         | 32-128 g – insectivory – terrestrial      | 2         |
| 512-2048 g – carnivory – semiaquatic   | 1         | 32-128 g – omnivory – scansorial       | 1         | 128-512 g – carnivory – terrestrial       | 1         |
| <b>Total</b>                           | <b>5</b>  | 128-512 g – omnivory – arboreal        | 2         | 128-512 g – insectivory – scansorial      | 1         |
|                                        |           | 128-512 g – herbivory – gliding        | 1         | 512-2048 g – carnivory – terrestrial      | 1         |
|                                        |           | <b>Total</b>                           | <b>10</b> | 512-2048 g – carnivory –<br>semifossorial | 1         |
|                                        |           |                                        |           | 2048 g – carnivory – terrestrial          | 1         |
|                                        |           |                                        |           | <b>Total</b>                              | <b>10</b> |

| Dawangzhangzi                          |           | Messel                                  |           |
|----------------------------------------|-----------|-----------------------------------------|-----------|
| Ecological parameter value combination | Frequency | Ecological parameter value combination  | Frequency |
| <32 g – insectivory – arboreal         | 1         | <32 g – omnivory – arboreal             | 1         |
| <32 g – insectivory – scansorial       | 1         | <32 g – herbivory – arboreal            | 1         |
| <32 g – insectivory – semiaquatic      | 1         | 32-128 g – insectivory – arboreal       | 1         |
| <32 g – insectivory – semifossorial    | 1         | 32-128 g – insectivory – saltatorial    | 1         |
| 32-128 g – insectivory – terrestrial   | 1         | 32-128 g – omnivory – terrestrial       | 1         |
| 32-128 g – omnivory – arboreal         | 1         | 128-512 g – carnivory – terrestrial     | 1         |
| <b>Total</b>                           | <b>6</b>  | 128-512 g – insectivory – semifossorial | 1         |
|                                        |           | 128-512 g – omnivory – arboreal         | 1         |
|                                        |           | 128-512 g – omnivory – fossorial        | 1         |
|                                        |           | 512-2048 g – carnivory – saltatorial    | 1         |
|                                        |           | 512-2048 g – insectivory – fossorial    | 1         |
|                                        |           | 512-2048 g – insectivory – saltatorial  | 2         |
|                                        |           | 512-2048 g – omnivory – arboreal        | 1         |
|                                        |           | 512-2048 g – omnivory – semiaquatic     | 1         |
|                                        |           | 512-2048 g – omnivory – fossorial       | 1         |
|                                        |           | 512-2048 g – herbivory – arboreal       | 1         |
|                                        |           | 512-2048 g – herbivory – terrestrial    | 2         |
|                                        |           | >2048 g – carnivory – arboreal          | 1         |
|                                        |           | >2048 g – omnivory – terrestrial        | 1         |
|                                        |           | <b>Total</b>                            | <b>21</b> |

**Table S14.** Observed and simulated *C*-scores of ecospace occupation of 98 extant, small-bodied mammalian communities arranged by habitat openness, climate type, and vegetation type.

| Environmental category |                          | Observed<br><i>C</i> -score | Lower<br>95% CI | Upper<br>95% CI | Lower-tail P | Upper-tail P | Standardized effect size (SES) |
|------------------------|--------------------------|-----------------------------|-----------------|-----------------|--------------|--------------|--------------------------------|
| Habitat<br>openness    | Open                     | 15.232                      | 14.579          | 14.787          | > 0.999      | < 0.001      | 8.5719                         |
|                        | Closed                   | 11.583                      | 10.237          | 10.668          | > 0.999      | < 0.001      | 9.5293                         |
| Climate<br>type        | Tropical                 | 6.0058                      | 5.5726          | 5.7543          | > 0.999      | < 0.001      | 6.9773                         |
|                        | Arid                     | 7.1302                      | 6.727           | 6.9238          | > 0.999      | < 0.001      | 6.9943                         |
|                        | Temperate                | 3.6165                      | 2.9396          | 3.1344          | > 0.999      | < 0.001      | 12.29                          |
|                        | Cold                     | 12.681                      | 11.089          | 11.76           | > 0.999      | < 0.001      | 6.8895                         |
| Vegetation<br>type     | Tropical rainforest      | 2.457                       | 2.276           | 2.365           | > 0.999      | < 0.001      | 5.9586                         |
|                        | Tropical seasonal forest | 1.2688                      | 1.1896          | 1.2857          | 0.814        | 0.195        | 1.0426                         |
|                        | Savanna                  | 1.4381                      | 1.381           | 1.5714          | 0.419        | 0.681        | -0.40948                       |
|                        | Grassland                | 5.7653                      | 5.3229          | 5.5677          | > 0.999      | < 0.001      | 5.2567                         |
|                        | Shrubland                | 3.3949                      | 3.2162          | 3.3093          | > 0.999      | < 0.001      | 5.2778                         |
|                        | Desert                   | 2.0619                      | 1.9381          | 2.0048          | > 0.999      | < 0.001      | 5.4206                         |
|                        | Temperate forest         | 3.2868                      | 2.4549          | 2.8559          | > 0.999      | < 0.001      | 5.8811                         |
| Boreal forest          | 2.1895                   | 1.8895                      | 2.1474          | 0.996           | 0.004        | 2.9567       |                                |

Confidence intervals are the 95% two-tailed cutoff points for the null distribution generated from 1000 simulations. P-values indicate whether the observed value fall beyond the lower or upper confidence intervals. The standardized effect size (SES) is the number of standard deviations that the observed *C*-score is above or below the mean *C*-score value of the simulated communities. Grey rows indicate statistically significant results ( $P < 0.05$ ).

**Table S15.** Structural matrices, eigenvalues, and proportions of the variance explained by each function of the discriminant function analyses of 98 extant, small-bodied mammalian communities of different environmental classifications.

| Ecological parameter   | Habitat openness | Climate type |        |        | Vegetation type |        |        |
|------------------------|------------------|--------------|--------|--------|-----------------|--------|--------|
|                        | DF1              | DF1          | DF2    | DF3    | DF1             | DF2    | DF3    |
| < 32 g                 | 0.054            | -0.322       | -0.369 | 0.088  | -0.469          | 0.172  | 0.274  |
| 33–128 g               | 0.4              | -0.005       | -0.05  | -0.195 | -0.064          | -0.072 | -0.489 |
| 129–512 g              | -0.424           | 0.274        | 0.404  | 0.165  | 0.506           | 0.041  | 0.15   |
| 513–2048 g             | -0.307           | 0.211        | 0.495  | 0.156  | 0.329           | -0.141 | 0.181  |
| > 2049 g               | -0.298           | 0.101        | 0.122  | 0.002  | 0.207           | -0.148 | 0.262  |
| Carnivory              | -0.447           | 0.155        | -0.271 | 0.512  | -0.012          | -0.023 | 0.574  |
| Insectivory            | -0.218           | 0.158        | -0.134 | 0.103  | 0.217           | 0.179  | 0.122  |
| Omnivory               | -0.392           | 0.53         | -0.018 | 0.255  | 0.255           | -0.378 | 0.298  |
| Granivory              | 0.679            | -0.21        | -0.149 | -0.662 | -0.287          | 0.113  | -0.709 |
| Frugivory              | -0.597           | 0.567        | 0.424  | 0.16   | 0.813           | 0.08   | 0.095  |
| Herbivory              | 0.072            | -0.723       | 0.247  | 0.223  | -0.374          | 0.163  | 0.251  |
| Gliding                | -0.322           | -0.175       | 0.228  | 0.093  | -0.036          | 0.104  | 0.32   |
| Arboreal               | -0.47            | 0.639        | 0.324  | 0.05   | 0.82            | -0.029 | -0.027 |
| Scansorial             | -0.63            | 0.23         | -0.247 | 0.4    | 0.23            | 0.533  | 0.375  |
| Terrestrial            | -0.026           | 0.171        | -0.012 | 0.16   | -0.116          | -0.459 | 0.262  |
| Semiaquatic            | -0.149           | -0.165       | 0.153  | 0.221  | -0.04           | 0.078  | 0.27   |
| Semifossorial          | 0.479            | -0.5         | 0.009  | -0.159 | -0.35           | -0.014 | -0.13  |
| Fossorial              | 0.106            | 0.056        | -0.246 | -0.312 | -0.085          | -0.017 | -0.182 |
| Saltatorial            | 0.426            | -0.359       | 0.01   | -0.464 | -0.263          | 0.138  | -0.399 |
| Eigenvalue             | 9.233            | 9.525        | 7.128  | 4.302  | 7.700           | 4.580  | 2.711  |
| Variance explained (%) | 100              | 56.68        | 31.75  | 11.57  | 56.00           | 19.81  | 11.21  |

**Table S16.** Classification predictions of the discriminant function analysis of habitat openness.

| Assigned Habitat openness | % Correct | Inferred Habitat openness |      |
|---------------------------|-----------|---------------------------|------|
|                           |           | Closed                    | Open |
| Closed                    | 80.00     | 36                        | 9    |
| Open                      | 75.47     | 13                        | 40   |
| Total                     | 77.55     | 49                        | 49   |

**Table S17.** Classification predictions of the discriminant function analysis of climate type.

| Assigned Climate type | % Correct | Inferred Climate type |      |           |      |
|-----------------------|-----------|-----------------------|------|-----------|------|
|                       |           | Tropical              | Arid | Temperate | Cold |
| Tropical              | 83.33     | 20                    | 3    | 1         | 0    |
| Arid                  | 72.00     | 0                     | 18   | 6         | 1    |
| Temperate             | 90.00     | 1                     | 1    | 18        | 0    |
| Cold                  | 93.10     | 0                     | 0    | 2         | 27   |
| Total                 | 84.69     | 21                    | 22   | 27        | 28   |

**Table S18.** Classification predictions of the discriminant function analysis of vegetation type.

| Assigned Vegetation type | % Correct | Inferred Vegetation type |                          |         |           |           |        |                  |               |
|--------------------------|-----------|--------------------------|--------------------------|---------|-----------|-----------|--------|------------------|---------------|
|                          |           | Tropical rain forest     | Tropical seasonal forest | Savanna | Grassland | Shrubland | Desert | Temperate forest | Boreal forest |
| Tropical rain forest     | 75.00     | 9                        | 2                        | 0       | 0         | 1         | 0      | 0                | 0             |
| Tropical seasonal forest | 62.50     | 2                        | 5                        | 0       | 0         | 1         | 0      | 0                | 0             |
| Savanna                  | 100.00    | 0                        | 0                        | 6       | 0         | 0         | 0      | 0                | 0             |
| Grassland                | 55.00     | 0                        | 0                        | 3       | 11        | 2         | 1      | 0                | 3             |
| Shrubland                | 55.56     | 0                        | 0                        | 1       | 3         | 10        | 3      | 0                | 1             |
| Desert                   | 77.78     | 0                        | 0                        | 0       | 0         | 1         | 7      | 1                | 0             |
| Temperate forest         | 87.50     | 0                        | 0                        | 0       | 0         | 0         | 1      | 14               | 1             |
| Boreal forest            | 77.78     | 0                        | 0                        | 0       | 1         | 1         | 0      | 0                | 7             |
| Total                    | 70.41     | 11                       | 7                        | 10      | 15        | 16        | 12     | 15               | 12            |

**Table S19.** Paleoenvironmental inferences of extinct mammaliaform communities using DFA, Whittaker biomes, and auxiliary paleo-proxy data.

| Epoch             | Paleocommunity | Paleoenvironmental inference |              |                          |                                  |                                  |                                  | Auxiliary paleo-proxy data <sup>a</sup>                                                                                                                                                                                               |                                                                                                                                                                                                           |
|-------------------|----------------|------------------------------|--------------|--------------------------|----------------------------------|----------------------------------|----------------------------------|---------------------------------------------------------------------------------------------------------------------------------------------------------------------------------------------------------------------------------------|-----------------------------------------------------------------------------------------------------------------------------------------------------------------------------------------------------------|
|                   |                | DFA inference                |              |                          | Whittaker biome inference        |                                  |                                  | Climate type                                                                                                                                                                                                                          | Vegetation type                                                                                                                                                                                           |
|                   |                | Habitat openness             | Climate type | Vegetation type          | DFI <sub>habitat openness</sub>  | DFI <sub>climate type</sub>      | DFI <sub>vegetation type</sub>   |                                                                                                                                                                                                                                       |                                                                                                                                                                                                           |
| Eocene            | MSL            | Open                         | Tropical     | Tropical rainforest      | Shrubland/woodland               | Tropical seasonal forest/savanna | Tropical seasonal forest/savanna | Humid, subtropical, frost-free climate, with slight seasonality; MAT= 22°C, MAP =2540 mm <sup>113-115</sup>                                                                                                                           | Multistratal canopy forest with lots of lianas; some herbaceous components, perhaps in open swampy settings; possibly drier habitats in distant uplands <sup>110</sup>                                    |
| Early Cretaceous  | DWZZ           | Open                         | Arid         | Tropical seasonal forest | Shrubland/woodland               | Shrubland/woodland               | Shrubland/woodland               | Temperate, semi-humid <sup>117</sup> ; subtropical to warm temperate with seasonal arid, to warm-temperate and humid with seasonal variations <sup>118, 119</sup> ; warm and seasonal, short wet but long arid periods <sup>120</sup> | Cool temperate moist forest consisting of ginkgoes cycads, seed ferns, and conifers <sup>116</sup> ; mainly conifer forest and steppe <sup>117</sup> ; conifer and ginkgophytes dominating <sup>121</sup> |
|                   | LJT-JSG        | Closed                       | Tropical     | Tropical seasonal forest | Temperate seasonal forest        | Tropical seasonal forest/savanna | Tropical seasonal forest/savanna |                                                                                                                                                                                                                                       |                                                                                                                                                                                                           |
| Mid-Late Jurassic | TJS            | Closed                       | Cold         | Tropical rainforest      | Tropical seasonal forest/savanna | Shrubland/woodland               | Shrubland/woodland               | Warm temperate <sup>122, 123</sup> ; warm-temperate and moist conditions <sup>124</sup> ; mountain <sup>125</sup> ; hot, dry climate <sup>126</sup> ; subtropical, humid, seasonal <sup>127</sup>                                     | N/A                                                                                                                                                                                                       |
|                   | JLS            | Closed                       | Cold         | Tropical rainforest      | Temperate seasonal forest        | Shrubland/woodland               | Shrubland/woodland               |                                                                                                                                                                                                                                       |                                                                                                                                                                                                           |

<sup>a</sup>Auxiliary evidence for paleoenvironment based on fossil plants, fossil insects, stable isotopic data and/or sedimentology, see cited references.



**Table S20.** Estimated mean annual temperature (MAT) and mean annual precipitation (MAP) of extinct mammaliaform communities using DF1 scores by three different environmental categories.

| Epoch             | Paleocommunity | Estimated MAT and MAP* |            |              |            |                 |            |
|-------------------|----------------|------------------------|------------|--------------|------------|-----------------|------------|
|                   |                | Habitat openness       |            | Climate type |            | Vegetation type |            |
|                   |                | MAT (°C)               | MAP (mm)   | MAT (°C)     | MAP (mm)   | MAT (°C)        | MAP (mm)   |
| Eocene            | MSL            | 12 ± 1.6               | 811 ± 225  | 22 ± 1.8     | 1786 ± 307 | 19 ± 2.1        | 1790 ± 280 |
| Early Cretaceous  | DWZZ           | 12 ± 1.6               | 836 ± 220  | 19 ± 1.5     | 1539 ± 252 | 18 ± 1.8        | 1548 ± 235 |
|                   | LJT-JSG        | 15 ± 1.9               | 1161 ± 245 | 24 ± 2.1     | 2031 ± 366 | 21 ± 2.5        | 2031 ± 330 |
| Mid-Late Jurassic | TJS            | 20 ± 4.3               | 1853 ± 563 | 14 ± 1.1     | 1048 ± 186 | 14 ± 1.3        | 1064 ± 178 |
|                   | JLS            | 16 ± 2.3               | 1341 ± 310 | 11 ± 1.1     | 756 ± 191  | 12 ± 1.3        | 778 ± 181  |

\* The MAT and MAP is estimated by using the relationships between DF1 scores of DFA and the environmental factors in the correlation analysis in *SI Appendix*, Figs. S13, S14.

## References for SI reference citations

1. Bourlière F (1975) Mammals, small and large: the ecological implications of size. *Small Mammals: Their Productivity and Population Dynamics*, eds Golley FB, Petruszewicz K, Ryszkowski L (Cambridge University Press, Cambridge), pp 1-8.
2. Merritt JF (2010) *The Biology of Small Mammals* (Johns Hopkins University Press, Baltimore).
3. Lillegraven JA, Kielan-Jaworowska Z, Clemens WA (1979) *Mesozoic Mammals: The First Two-thirds of Mammalian History* (University of California Press, Berkeley).
4. Kielan-Jaworowska Z, Cifelli R, Luo Z-X (2004) *Mammals from the Age of Dinosaurs* (Columbia University Press, New York).
5. Peel MC, Finlayson BL, McMahon TA (2007) Updated world map of the Köppen-Geiger climate classification. *Hydrol Earth Syst Sci* 11:1633-1644.
6. Ricklefs RE (2008) *The Economy of Nature* (W. H. Freeman and Company, New York).
7. Kottek M, Grieser J, Beck C, Rudolf B, Rubel F (2006) World Map of the Köppen-Geiger climate classification updated. *Meteorologische Zeitschrift* 15:259-263.
8. Rubel F, Brugger K, Haslinger K, Auer I (2017) The climate of the European Alps: shift of very high resolution Köppen-Geiger climate zones 1800–2100. *Meteorologische Zeitschrift* 26:115-125.
9. Meng J (2014) Mesozoic mammals of China: implications for phylogeny and early evolution of mammals. *Natl Sci Rev* 1:521-542.
10. Zhou Z-H, Barrett PM, Hilton J (2003) An exceptionally preserved Lower Cretaceous ecosystem. *Nature* 421:807-814.
11. Meng J, Hu Y-M, Li C-K, Wang Y-Q (2006) The mammal fauna in the Early Cretaceous Jehol Biota: implications for diversity and biology of Mesozoic mammals. *Geological Journal* 41:439-463.
12. Zhou Z (2014) The Jehol Biota, an Early Cretaceous terrestrial Lagerstätte: new discoveries and implications. *Natl Sci Rev* 1:543-559.
13. Wing SL, Sues H-D, Potts R, DiMichele WA, Behrensmeyer AK (1992) Evolutionary ecology. *Terrestrial Ecosystems through Time: Evolutionary Paleocology of Terrestrial Plants and Animals*, eds Behrensmeyer AK, Damuth JD, DiMichele WA, Potts R, Sues H-D, Wing SL (The University of Chicago Press, Chicago and London), pp 1-13.
14. Pan Y, Sha J, Zhou Z, Fursich FT (2013) The Jehol Biota: Definition and distribution of exceptionally preserved relicts of a continental Early Cretaceous ecosystem. *Cretac Res* 44:30-38.
15. Sullivan C, Wang Y, Hone DWE, Wang Y-Q, Xu X, Zhang F-C (2014) The vertebrates of the Jurassic Daohugou Biota of northeastern China. *J Vertebr Paleontol* 34:243-280.
16. Huang DY (2015) Yanliao biota and Yanshan movement. *Acta Palaeontologica Sinica* 54:501-546.
17. Yabe H, Shikama T (1938) A new Jurassic Mammalia from South Manchuria. *Proceedings of the Imperial Academy* 14:353-357.
18. Zhou M-Z, Cheng Z-W, Wang Y-Q (1991) A mammalian lower jaw from the Jurassic of Lingyuan, Liaoning. *Vertebrata Palasiatica* 29:165-175.
19. Yuan C, Xu L, Zhang X-L, Wu Y-H, Ji Q (2009) A new species of *Gobiconodon* (Mammalia) from Western Liaoning, China and its implication for the dental formula of *Gobiconodon*. *Acta Geologica Sinica* (English Edition) 83:207-211.
20. Eisenberg JF (1981) *The Mammalian Radiations: An Analysis of Trends in Evolution, Adaptation, and Behavior* (The University of Chicago Press, Chicago).
21. Kingdon J (1997) *The Kingdon Field Guide to African Mammals* (Bloomsbury, London).
22. Nowak RM (1999) *Walker's Mammals of the World* (The Johns Hopkins University Press, Baltimore). 6th Ed.
23. Fleming TH (1973) Numbers of mammal species in North and Central American forest communities. *Ecology* 54:555-563.
24. Damuth JD, MacFadden BJ (1990) Introduction: body size and its estimation. *Body Size in Mammalian Paleobiology Estimation and Biological Implications*, eds Damuth JD, MacFadden BJ (Cambridge University Press), pp 1-10.
25. Van Valkenburgh B (1994) Ecomorphological analysis of fossil vertebrates and their paleocommunities. *Ecological Morphology: Integrative Organismal Biology*, eds Wainwright PC and Reilly SM (The University of Chicago Press, Chicago and London), pp 140-166.
26. Evans AR, Wilson GP, Fortelius M, Jernvall J (2007) High-level similarity of dentitions in carnivorans and rodents. *Nature* 445:78-81.
27. Chen M, Wilson GP (2015) A multivariate approach to infer locomotor modes in Mesozoic mammals. *Paleobiology* 41:280-312.
28. Foster JR (2009) Preliminary body mass estimates for mammalian genera of the Morrison Formation (Upper Jurassic, North America). *PaleoBios* 28:114-122.
29. Campione NE, Evans DC (2012) A universal scaling relationship between body mass and proximal limb bone dimensions in quadrupedal terrestrial tetrapods. *BMC Biol* 10:60.

30. Pineda-Munoz S, Alroy J (2015) Dietary characterization of terrestrial mammals. *Proc Biol Sci* 281:20141173.
31. Smits PD, Evans AR (2012) Functional constraints on tooth morphology in carnivorous mammals. *BMC Evol Biol* 12:146.
32. Santana SE, Strait S, Dumont ER (2011) The better to eat you with: functional correlates of tooth structure in bats. *Funct Ecol* 25:839-847.
33. Boyer DM, Evans AR, Jernvall J (2010) Evidence of dietary differentiation among late Paleocene-early Eocene plesiadapids (Mammalia, primates). *Am J Phys Anthropol* 142:194-210.
34. Wilson GP, Evans AR, Corfe IJ, Smits PD, Fortelius M, Jernvall J (2012) Adaptive radiation of multituberculate mammals before the extinction of dinosaurs. *Nature* 483:457-460.
35. Evans AR (2013) Shape descriptors as ecometrics in dental ecology. *Hystrix* 24:133-140.
36. Villéger S, Mason NWH, Mouillot D (2008) New multidimensional functional diversity indices for a multifaceted framework in functional ecology. *Ecology* 89:2290-2301.
37. Schleuter D, Daufresne M, Massol F, Argillier C (2010) A user's guide to functional diversity indices. *Ecol Monogr* 80:469-484.
38. Forchhammer MC, Clutton-Brock TH, Lindström J, Albon SD (2001) Climate and population density induce long-term cohort variation in a northern ungulate. *J Anim Ecol* 70:721-729.
39. Brown JH, Ernest SKM, Parody JM, Haskell JP (2001) Regulation of diversity: maintenance of species richness in changing environments. *Oecologia* 126:321-332.
40. Walther G-R, Post E, Convey P, Menzel A, Parmesan C, Beebee TJC, Fromentin J-M, Hoegh-Guldberg O, Bairlein F (2002) Ecological responses to recent climate change. *Nature* 416:389-395.
41. Anderson MJ, Ellingsen KE, McArdle BH (2006) Multivariate dispersion as a measure of beta diversity. *Ecol Lett* 9:683-693.
42. Anderson MJ (2006) Distance-based tests for homogeneity of multivariate dispersions. *Biometrics* 62:245-253.
43. Oksanen J, Blanchet FG, Friendly M, Kindt R, Legendre P, McGlenn D, Minchin PR, O'Hara RB, Simpson GL, Solymos P, Stevens MHH, Szoecs E, Wagner H (2016) Package "vegan." 1-291.
44. Reed KE (1998) Using large mammal communities to examine ecological and taxonomic structure and predict vegetation in extant and extinct assemblages. *Paleobiology* 24:384-408.
45. Assefa Z, Yirga S, Reed KE (2008) The large-mammal fauna from the Kibish Formation. *J Hum Evol* 55:501-512.
46. Sokal RR, Rohlf FJ (2011) *Biometry* (W H Freeman & Company). 4 Ed.
47. Stone L, Roberts A (1990) The checkerboard score and species distributions. *Oecologia* 85:74-79.
48. Gotelli NJ, Hart EM, Ellison AM (2015) EcoSimR: Null model analysis for ecological data. <https://doi.org/10.5281/zenodo.16522>.
49. Gotelli NJ (2000) Null model analysis of species co-occurrence patterns. *Ecology* 81:2606-2621.
50. Gotelli NJ, McCabe DJ (2002) Species co-occurrence: a meta-analysis of J. M. Diamond's assembly rules model. *Ecology* 83:2091-2096.
51. R Core Team (2017) *R: A Language and Environment for Statistical Computing* (R Foundation for Statistical Computing, Vienna, Austria: URL <https://www.R-project.org/>).
52. Staver AC, Archibald S, Levin SA (2011) The global extent and determinants of savanna and forest as alternative biome states. *Science* 334:230-232.
53. Zheng X-T, Bi S-D, Wang X-L, Meng J (2013) A new arboreal haramiyid shows the diversity of crown mammals in the Jurassic period. *Nature* 500:199-202.
54. Bi S-D, Wang Y-Q, Guan J, Sheng X, Meng J (2014) Three new Jurassic euharamiyidan species reinforce early divergence of mammals. *Nature* 514:579-584.
55. Chu Z-Y, He H-Y, Ramezani J, Bowring SA, Hu D-Y, Zhang L-J, Zheng S-L, Wang X-L, Zhou Z-H, Deng C-L, Guo J-H (2016) High-precision U-Pb geochronology of the Jurassic Yanliao Biota from Jianchang (western Liaoning Province, China): age constraints on the rise of feathered dinosaurs and eutherian mammals. *Geochem Geophys Geosyst* 17:3983-3992.
56. Meng Q-J, Grossnickle DM, Liu D, Zhang Y-G, Neander AI, Ji Q, Luo Z-X (2017) New gliding mammaliaforms from the Jurassic. *Nature* 548:291-296.
57. Yuan C-X, Ji Q, Meng Q-J, Tabrum AR, Luo Z-X (2013) Earliest evolution of multituberculate mammals revealed by a new Jurassic fossil. *Science* 341:779-783.
58. Luo Z-X, Yuan C-X, Meng Q-J, Ji Q (2011) A Jurassic eutherian mammal and divergence of marsupials and placentals. *Nature* 476:442-445.
59. Luo Z-X, Meng Q-J, Grossnickle DM, Liu D, Neander AI, Zhang Y-G, Ji Q (2017) New evidence for mammaliaform ear evolution and feeding adaptation in a Jurassic ecosystem. *Nature* 548:326-329.
60. Liu Y-Q, Kuang H-W, Jiang X-J, Peng N, Xu H, Sun H-Y (2012) Timing of the earliest known feathered dinosaurs and transitional pterosaurs older than the Jehol Biota. *Palaeogeogr Palaeoclimatol Palaeoecol* 323-325:1-12.

61. Han G, Mao F-Y, Bi S-D, Wang Y-Q, Meng J (2017) A Jurassic gliding euharamiyidan mammal with an ear of five auditory bones. *Nature* 551:451-456.
62. Luo Z-X, Meng Q-J, Ji Q, Liu D, Zhang Y-G, Neander AI (2015) Evolutionary development in basal mammaliaforms as revealed by a docodontan. *Science* 347:760-764.
63. Meng Q-J, Ji Q, Zhang Y-G, Liu D, Grossnickle DM, Luo Z-X (2015) An arboreal docodont from the Jurassic and mammaliaform ecological diversification. *Science* 347:764-768.
64. Zhou C-F, Wu S, Martin T, Luo Z-X (2013) A Jurassic mammaliaform and the earliest mammalian evolutionary adaptations. *Nature* 500:163-167.
65. Liu Y-Q, Liu Y-X, Ji S-A, Yang Z-Q (2006) U-Pb zircon age for the Daohugou Biota at Ningcheng of Inner Mongolia and comments on related issues. *Chin Sci Bull* 51:2634-2644.
66. Ji Q, Luo Z-X, Yuan C-X, Tabrum AR (2006) A swimming mammaliaform from the Middle Jurassic and ecomorphological diversification of early mammals. *Science* 311:1123-1127.
67. Meng J, Hu Y-M, Wang Y-Q, Wang X-L, Li C-K (2006) A Mesozoic gliding mammal from northeastern China. *Nature* 444:889-893.
68. Luo Z-X, Ji Q, Yuan C-X (2007) Convergent dental adaptations in pseudo-tribosphenic and tribosphenic mammals. *Nature* 450:93-97.
69. Ji Q, Luo Z-X, Yuan C-X, Wible JR, Zhang J-P, Georgi JA (2002) The earliest known eutherian mammal. *Nature* 416:816-822.
70. Smith PE, Evensen NM, York D, Chang M-M, Jin F, L J-L, Cumbaa S, Russell D (1995) Dates and rates in ancient lakes: 40Ar-39Ar evidence for an Early Cretaceous age for the Jehol Group, Northeast China. *Can J Earth Sci* 32:1426-1431.
71. Swisher III CC, Wang Y-Q, Wang X-L, Xu X, Wang Y (1999) Cretaceous age for the feathered dinosaurs of Liaoning, China. *Nature* 398:58-61.
72. Swisher III CC, Wang X-L, Zhou Z-H, Wang Y-Q, Jin Fan, Zhang J-Y, Xu X, Zhang F-C, Wang Y (2002) Further support for a Cretaceous age for the feathered-dinosaur beds of Liaoning, China: new 40Ar-39Ar dating of the Yixian and Tuchengzi formations. *Chin Sci Bull* 47:135-138.
73. Luo Z-X, Chen P-J, Li G, Chen M (2007) A new eutriconodont mammal and evolutionary development in early mammals. *Nature* 446:288-293.
74. Luo Z-X, Ji Q, Wible JR, Yuan C-X (2003) An Early Cretaceous tribosphenic mammal and metatherian evolution. *Science* 302:1934-1940.
75. Hu Y-M, Wang Y-Q (2002) *Sinobaatar* gen. nov.: first multituberculate from the Jehol Biota of Liaoning, northeast China. *Chin Sci Bull* 47:933-938.
76. Li G, Luo Z-X (2006) A Cretaceous symmetrodont therian with some monotreme-like postcranial features. *Nature* 439:195-200.
77. Hou S-L, Meng J (2014) A new eutriconodont mammal from the early Cretaceous Jehol biota of Liaoning, China. *Chin Sci Bull* 59:546-553.
78. Hu Y-M, Meng J, Li C-K, Wang Y-Q (2009) New basal eutherian mammal from the Early Cretaceous Jehol biota, Liaoning, China. *Proc Biol Sci* 277:229-236.
79. He H-Y, Wang X-L, Zhou Z-H, Jin F, Wang F, Yang L-K, Ding X, Boven A, Zhu R-X (2006) 40Ar/39Ar dating of Lujiatun Bed (Jehol Group) in Liaoning, northeastern China. *Geophys Res Lett* 33:L04303.
80. Li C-K, Wang Y-Q, Hu Y-M, Meng J (2003) A new species of *Gobiconodon* (Triconodonta, Mammalia) and its implication for the age of Jehol biota. *Chin Sci Bull* 48:1129-1134.
81. Gao C-L, Wilson GP, Luo Z-X, Maga AM, Meng Q-J, Wang X-R (2010) A new mammal skull from the Lower Cretaceous of China with implications for the evolution of obtuse-angled molars and “amphilestid” eutriconodonts. *Proc Biol Sci* 277:237-246.
82. Meng J, Hu Y-M, Wang Y-Q, and Li C-K (2005) A new triconodont (Mammalia) from the Early Cretaceous Yixian Formation of Liaoning, China. *Vertebrata Palasiatica* 43:1-10.
83. Hu Y-M, Meng J, Wang Y-Q, Li-K C (2005) Large Mesozoic mammals fed on young dinosaurs. *Nature* 433:149-152.
84. Li J-L, Wang Y, Wang Y-Q, Li C-K (2001) A new family of primitive mammal from the Mesozoic of western Liaoning, China. *Chin Sci Bull* 46:782-786.
85. Ji Q, Luo Z-X, Ji S-A (1999) A Chinese triconodont mammal and mosaic evolution of the mammalian skeleton. *Nature* 398:326-330.
86. Ji Q, Luo Z-X, Zhang X, Yuan C-X, Xu L (2009) Evolutionary development of the middle ear in Mesozoic therian mammals. *Science* 326:278-281.
87. Rougier G, Ji Q, Novacek M (2003) A new symmetrodont mammal with fur impressions from the Mesozoic of China. *Acta Geologica Sinica* 77:7-14.
88. Hu Y-M, Wang Y-Q, Luo Z-X, Li C-K (1997) A new symmetrodont mammal from China and its implications for mammalian evolution. *Nature* 390:137-142.

89. Kurz C (2001) Osteologie einer Beutelratte (Didelphimorphia, Marsupialia, Mammalia) aus dem Mitteleozän der Grube Messel bei Darmstadt. *Kaupia* 11:83-109.
90. Kurz C (2005) Ecomorphology of opossum-like marsupials from the Tertiary of Europe and a comparison with selected taxa. *Kaupia* 14:21-26.
91. Dunne JA, Labandeira CC, Williams RJ (2014) Highly resolved early Eocene food webs show development of modern trophic structure after the end-Cretaceous extinction. *Proc Biol Sci* 281:20133280.
92. von Koenigswald W, Storch G (1992) The marsupials: inconspicuous opossums. *Messel: An Insight into the History of Life and of the Earth*, eds Schaal S, Ziegler W (Clarendon Press, Oxford), pp 155-158.
93. Lenz OK, Wilde V, Mertz DF, Riegel W (2015) New palynology-based astronomical and revised 40Ar/39Ar ages for the Eocene maar lake of Messel (Germany). *Int J Earth Sci* 104:873-889.
94. Rose KD (2009) *The Beginning of the Age of Mammals* (Johns Hopkins University Press). 1st Ed.
95. Rose KD (2012) The importance of Messel for interpreting Eocene Holarctic mammalian faunas. *Paleobiodivers Palaeoenviron* 92:631-647.
96. Morlo M, Habersetzer J (1999) The Hyaenodontidae (Creodonta, Mammalia) from the lower Middle Eocene (MP 11) of Messel (Germany) with special remarks on new x-ray methods. *Courier Forschungsinstitut Senckenberg* 216:31-73.
97. Storch G (2012) Paleobiological implications of the messel mammalian assemblage. *Eocene Biodiversity: Unusual Occurrences and Rarely Sampled Habitats*, eds Gunnell GF (Springer Science+Business Media, New York), pp 215-235.
98. Storch G (1993) Morphologie und Paläobiologie von *Macrocraanium tenerum*, einem Erinaceomorphen aus dem Mittel-Eozän von Messel bei Darmstadt (Mammalia, Lipotyphla). *Senckenbergiana lethaea* 73:61-81.
99. Storch G (1996) Paleobiology of Messel erinaceomorphs. *Palaeovertebrata* 25:215-224.
100. Maier W (1979) *Macrocraanium tupaiodon*, an adapisoricid (?) insectivore from the Eocene of "Grube Messel" (Western Germany). *Palaontol Z* 53:38-62.
101. Preuschoft and Franzen JL (2012) Locomotion and biomechanics in Eocene mammals from Messel. *Paleobiodivers Palaeoenviron* 92:459-476.
102. Frey E, Herkner B, Schrenk F, and Seiffert C (1993) Reconstructing organismic constructions and the problem of *Leptictidium*'s locomotion. *Kaupia* 3:89-95.
103. Christian A (1999) Zur Biomechanik der Fortbewegung von *Leptictidium* (Mammalia, Proteutheria). *Courier Forschungsinstitut Senckenberg* 216:1-18.
104. Ruf I, Volpato V, Rose KD, Billet G, de Muizon C, Lehmann T (2016) Digital reconstruction of the inner ear of *Leptictidium auderiense* (Leptictida, Mammalia) and North American leptictids reveals new insight into leptictidan locomotor agility. *Palaontol Z* 90:153-171.
105. Schaal S, Ziegler W (1992) *Messel: An Insight into the History of Life and of the Earth* (Clarendon Press, Oxford).
106. von Koenigswald W, Storch G, Richter G (1992) Primitive insectivores, extraordinary hedgehogs, and long-fingers. *Messel: An Insight into the History of Life and of the Earth*, eds Schaal S, Ziegler W (Clarendon Press, Oxford), pp 159-177.
107. Franzen JL, Gingerich PD, Habersetzer J, Hurum JH, von Koenigswald W, Smith BH (2009) Complete primate skeleton from the Middle Eocene of Messel in Germany: morphology and paleobiology. *PLoS One* 4(5):e5723.
108. Franzen JL (2000) Der sechste Messel-Primate (Mammalia, Primates, Notharctidae, Cercamoniinae). *Senckenbergiana lethaea* 80:289-303.
109. Storch G, Seiffert C (2007) Extraordinarily preserved specimen of the oldest known glirid from the middle Eocene of Messel (Rodentia). *J Vertebr Paleontol* 27:189-194.
110. Collinson ME, Smith SY, Manchester SR, Wilde V, Howard LE, Robson BE, Ford DSF, Marone F, Fife JL, Stambanoni M (2012) The value of X-ray approaches in the study of the Messel fruit and seed flora. *Paleobiodivers Palaeoenviron* 92:403-416.
111. Whittaker RH, Likens GE (1973) Primary production: the biosphere and man. *Hum Ecol* 1:357-369.
112. Cramer W, Kicklighter DW, Bondeau A, Moore B, III, Churkina G, Nemry B, Ruimy A, Schloss AL, the participants of the Potsdam NPP Model Intercomparison (1999) Comparing global models of terrestrial net primary productivity (NPP): overview and key results. *Glob Chang Biol* 5:1-15.
113. Grein M, Utescher T, Wilde V, Roth-Nebelsick A (2011) Reconstruction of the middle Eocene climate of Messel using palaeobotanical data. *Neues Jahrb Geol Palaontol Abh* 260:305-318.
114. Franzen JL (2012) Taphonomic analysis of the Messel Formation. *Eocene Biodiversity: Unusual Occurrences and Rarely Sampled Habitats*, eds Gunnell GF (Springer Science+Business Media, New York), pp 197-213.
115. Selden P, Nudds JR (2012) *Evolution of Fossil Ecosystems* (Manson Publishing, London).
116. Amiot R, Wang X, Zhou Z-H, Wang X-L, Lécuyer C, Buffetaut E, Fluteau F, Ding Z-L, Kusuhashi N, Mo J-Y, Philippe M, Suteethorn V, Wang Y-Q, Xu X (2015) Environment and ecology of East Asian dinosaurs during the Early Cretaceous inferred from stable oxygen and carbon isotopes in apatite. *J Asian Earth Sci* 98:358-370.

117. Wang C-S, Feng Z-Q, Zhang L-M, Huang Y-J, Gao K, Wang P-J, Zhao B (2013) Cretaceous paleogeography and paleoclimate and the setting of SKI borehole sites in Songliao Basin, northeast China. *Palaeogeogr Palaeoclimatol Palaeoecol* 385:17-30.
118. Yang X-J, Wang Y-D, Zhang W (2013) Occurrences of Early Cretaceous fossil woods in China: implications for paleoclimates. *Palaeogeogr Palaeoclimatol Palaeoecol* 385:213-220.
119. Wu S-Q (1999) A preliminary study of the Jehol flora from western Liaoning. *Palaeoworld* 11:7-37 (in Chinese, with English abstract).
120. Fürsich FT, Sha J-G, Jiang B-Y, Pan Y-H (2007) High resolution palaeoecological and taphonomic analysis of Early Cretaceous lake biota, western Liaoning (NE-China). *Palaeogeogr Palaeoclimatol Palaeoecol* 253:434-457.
121. Li J-G, Batten DJ (2007) Palynological evidence of an Early Cretaceous age for the Yixian Formation at Sihetun, western Liaoning, China. *Cretac Res* 28:333-338.
122. Tan J-J, Ren D (2002) Palaeoecology of insect community from Middle Jurassic Jiulongshan Formation in Ningcheng County, Inner Mongolia, China. *Acta Zootaxonomica Sinica* 27:428-434.
123. Ren D, Shih C-K, Gao T-P, Yao Y-Z, Zhao, Y-Y (2010) *Silent Stories: Insect Fossil Treasures from Dinosaur Era of the Northeastern China* (Science Press, Beijing).
124. Sun C-L, Dilcher D-L, Wang H-S, Sun G, Ge Y-H (2008) A study of Ginkgo leaves from the Middle Jurassic of Inner Mongolia, China. *International Journal of Plant Science* 169:1128-1139.
125. Ren D (2003) *Study on the Jurassic Fossil Raphidioptera and Neuroptera from Northeast China* (PhD dissertation, Beijing Forestry University, Beijing).
126. Zheng S-L (2013) *Yanliao Flora* (Liaoning Publishing Group, Shenyang).
127. Jiang H-E, Ferguson D-K, Li C-S, Cheng Y-M (2008) Fossil coniferous wood from the Middle Jurassic of Liaoning Province, China. *Rev Palaeobot Palynol* 150:37-47.
128. Millien V, Bovy H (2010) When teeth and bones disagree: Body mass estimation of a giant extinct rodent. *J Mamm* 91:11-18.
129. Thewissen JGM, Gingerich PD (1989) Skull and endocranial cast of *Eoryctes melanus*, a new palaeoryctid (Mammalia: Insectivora) from the early Eocene of western North America. *J Vert Paleontol* 9:459-470.
130. Kielan-Jaworowska Z, Lancaster TE (2004) A new reconstruction of multituberculate endocranial casts and encephalization quotient of *Kryptobaatar*. *Acta Palaeontol Pol* 49:177-188.
